# Supplementary material
Source: publisher figshare collection journal article supplement (https://springernature.figshare.com/articles/dataset/_/28050587)
Supplement: Supplementary file 1 [file 1]

## Sheet: Fig5a-1
0.02778	-0.000149	0.06579	25.0466
0.05556	0.000476	0.05794	25.1124
0.08333	-5.4e-05	0.03357	25.1703
0.11111	-0.00101	0.0426	25.2039
0.13889	-0.0004	0.00349	25.2465
0.16667	-0.00015	0.00174	25.25
0.19444	-9e-06	0.000865	25.2517
0.22222	8.1e-05	0.000437	25.2526
0.25	-0.000842	0.06303	25.2531
0.27778	-0.000379	0.06897	25.3161
0.30556	-0.00151	-0.10496	25.385
0.33333	-0.000501	-0.81544	25.2801
0.36111	-0.00298	-1.25471	24.4646
0.38889	-0.00362	-1.26752	23.2099
0.41667	-0.00383	-1.26817	21.9424
0.44444	-0.00274	-1.25685	20.6743
0.47222	-0.00438	-1.26393	19.4174
0.5	-0.00489	-1.26788	18.1535
0.52778	-0.0031	-1.24293	16.8856
0.55556	-0.00306	-1.2856	15.6427
0.58333	-0.00543	-1.32744	14.3571
0.61111	-0.00505	-1.4007	13.0296
0.63889	-0.00528	-1.42756	11.6289
0.66667	-0.00761	-1.48298	10.2014
0.69444	-0.00665	-1.48319	8.71839
0.72222	-0.00748	-1.49778	7.23521
0.75	-0.00605	-1.53985	5.73743
0.77778	-0.00674	-1.55006	4.19759
0.80556	-0.00739	-1.56052	2.64752
0.83333	-0.00915	-1.57933	1.087
0.86111	-0.00826	-1.57156	-0.49233
0.88889	-0.00708	-1.54298	-2.06389
0.91667	-0.00751	-1.51956	-3.60687
0.94444	-0.0054	-1.47951	-5.12643
0.97222	-0.00696	-1.45994	-6.60593
1	-0.00884	-1.4205	-8.06588
1.02778	-0.00448	-1.3462	-9.48638
1.05556	-0.00592	-1.35641	-10.8326
1.08333	-0.00538	-1.32481	-12.189
1.11111	-0.0043	-1.28151	-13.5138
1.13889	-0.00665	-1.26426	-14.7953
1.16667	-0.00619	-1.23378	-16.0596
1.19444	-0.00502	-1.25375	-17.2933
1.22222	-0.00407	-1.19358	-18.5471
1.25	-0.00801	-1.21526	-19.7407
1.27778	-0.00549	-1.11869	-20.9559
1.30556	-0.00348	-1.13809	-22.0746
1.33333	-0.00485	-1.13607	-23.2127
1.36111	-0.00611	-1.11276	-24.3488
1.38889	-0.00274	-1.10437	-25.4615
1.41667	-0.00343	-1.08372	-26.5659
1.44444	-0.00322	-1.06341	-27.6496
1.47222	-0.00346	-0.98939	-28.713
1.5	-0.00386	-0.88117	-29.7024
1.52778	-0.00414	-0.68721	-30.5836
1.55556	-0.00296	-0.59226	-31.2708
1.58333	-0.0021	-0.53007	-31.8631
1.61111	-0.00295	-0.45886	-32.3931
1.63889	-0.00231	-0.3878	-32.852
1.66667	0.00215	-0.31906	-33.2398
1.69444	0.00136	-0.31074	-33.5588
1.72222	0.000146	-0.26835	-33.8696
1.75	-0.00188	-0.25311	-34.1379
1.77778	9.9e-05	-0.24747	-34.391
1.80556	-0.000625	-0.23566	-34.6385
1.83333	0.000175	-0.19674	-34.8742
1.86111	-0.000331	-0.19166	-35.0709
1.88889	-0.00215	-0.19082	-35.2626
1.91667	0.00087	-0.17819	-35.4534
1.94444	0.00115	-0.17307	-35.6316
1.97222	0.00288	-0.14855	-35.8047
2	0.000258	-0.14846	-35.9532
2.02778	0.000294	-0.14842	-36.1017
2.05556	0.00159	-0.14593	-36.2501
2.08333	0.000396	-0.12504	-36.396
2.11111	0.00244	-0.11675	-36.5211
2.13889	0.00181	-0.12069	-36.6378
2.16667	0.000961	-0.09847	-36.7585
2.19444	0.000938	-0.11737	-36.857
2.22222	0.00268	-0.07536	-36.9743
2.25	0.00367	-0.07784	-37.0497
2.27778	0.00141	-0.08967	-37.1275
2.30556	0.000547	-0.09137	-37.2172
2.33333	0.00207	-0.09747	-37.3086
2.36111	0.00109	-0.07667	-37.406
2.38889	0.00206	-0.07727	-37.4827
2.41667	0.000684	-0.06241	-37.56
2.44444	0.000871	-0.05419	-37.6224
2.47222	0.000145	-0.0623	-37.6766
2.5	0.00012	-0.05707	-37.7389
2.52778	-0.000727	-0.0536	-37.7959
2.55556	0.000791	-0.06013	-37.8495
2.58333	0.00291	-0.06012	-37.9097
2.61111	0.00354	-0.03747	-37.9698
2.63889	0.00178	-0.05577	-38.0073
2.66667	0.000406	-0.04716	-38.063
2.69444	-0.000242	-0.01699	-38.1102
2.72222	0.0047	-0.04826	-38.1272
2.75	-0.000505	-0.01293	-38.1754
2.77778	-0.000545	-0.0409	-38.1884
2.80556	0.000676	-0.02727	-38.2293
2.83333	0.00143	-0.04702	-38.2565
2.86111	0.00173	-0.01156	-38.3036
2.88889	0.00216	-0.0353	-38.3151
2.91667	0.000362	-0.02807	-38.3504
2.94444	0.00251	-0.03793	-38.3785
2.97222	0.00172	-0.02195	-38.4164
3	0.00304	-0.03405	-38.4384
3.02778	0.00201	-0.02584	-38.4724
3.05556	0.00184	-0.0084	-38.4983
3.08333	0.0017	-0.03625	-38.5067
3.11111	0.00187	-0.0148	-38.5429
3.13889	-0.000565	-0.00392	-38.5577
3.16667	0.0015	-0.00131	-38.5616
3.19444	0.00147	-0.00305	-38.5629
3.22222	0.00111	-0.03333	-38.566
3.25	0.00351	-0.01088	-38.5993
3.27778	0.00103	-0.01481	-38.6102
3.30556	0.00108	-0.00609	-38.625
3.33333	0.000455	-0.00872	-38.6311
3.36111	0.0013	-0.03232	-38.6398
3.38889	0.00189	-0.01145	-38.6721
3.41667	7.1e-05	-0.00349	-38.6836
3.44444	0.00247	0.00391	-38.6871
3.47222	0.00177	-0.00435	-38.6831
3.5	0.00468	-0.000436	-38.6875
3.52778	0.00096	-0.01151	-38.6879
3.55556	0.00118	-0.00918	-38.6994
3.58333	0.000912	-0.00436	-38.7086
3.61111	0.00229	0.0048	-38.713
3.63889	0.00374	-0.03048	-38.7082
3.66667	0.000171	-0.00741	-38.7387
3.69444	-0.000578	0.00349	-38.7461
3.72222	0.0033	-0.0074	-38.7426
3.75	0.00264	0.08023	-38.75
3.77778	0.00222	0.2932	-38.6698
3.80556	0.00303	0.50474	-38.3766
3.83333	0.00477	0.68195	-37.8718
3.86111	0.0051	0.83815	-37.1899
3.88889	0.00562	0.92115	-36.3517
3.91667	0.00493	1.01372	-35.4306
3.94444	0.00703	1.08325	-34.4169
3.97222	0.00596	1.14273	-33.3336
4	0.00442	1.26863	-32.1909
4.02778	0.00905	1.55213	-30.9222
4.05556	0.00846	1.41401	-29.3701
4.08333	0.00688	1.29392	-27.9561
4.11111	0.00641	1.27704	-26.6622
4.13889	0.00772	1.25687	-25.3852
4.16667	0.00336	1.24381	-24.1283
4.19444	0.00413	1.27645	-22.8845
4.22222	0.00393	1.26205	-21.608
4.25	0.00416	1.26456	-20.346
4.27778	0.00362	1.28777	-19.0814
4.30556	0.00481	1.30786	-17.7936
4.33333	0.00683	1.33834	-16.4858
4.36111	0.00414	1.35466	-15.1474
4.38889	0.00354	1.37104	-13.7928
4.41667	0.00485	1.38352	-12.4217
4.44444	0.00564	1.43298	-11.0382
4.47222	0.00762	1.6269	-9.60526
4.5	0.00494	1.52055	-7.97836
4.52778	0.00701	1.41903	-6.45781
4.55556	0.00565	1.39748	-5.03878
4.58333	0.00688	1.41208	-3.6413
4.61111	0.00346	1.40978	-2.22922
4.63889	0.00768	1.43588	-0.81944
4.66667	0.00382	1.49562	0.61644
4.69444	0.00554	1.47033	2.11206
4.72222	0.00487	1.45248	3.5824
4.75	0.00566	1.48171	5.03487
4.77778	0.00467	1.49344	6.51659
4.80556	0.00326	1.48821	8.01003
4.83333	0.00523	1.51946	9.49823
4.86111	0.00486	1.48667	11.0177
4.88889	0.00742	1.52332	12.5044
4.91667	0.00674	1.4914	14.0277
4.94444	0.00322	1.49205	15.5191
4.97222	0.00268	1.4769	17.0111
5	0.0021	1.44685	18.488
5.02778	0.00338	1.43679	19.9349
5.05556	0.00547	1.47381	21.3717
5.08333	0.0013	1.44289	22.8455
5.11111	0.00227	1.48257	24.2884
5.13889	-0.000498	1.49126	25.7709
5.16667	0.00229	1.51442	27.2622
5.19444	0.00326	1.53275	28.7766
5.22222	0.000889	1.5223	30.3094
5.25	0.00255	1.50057	31.8317
5.27778	0.00273	1.53857	33.3322
5.30556	0.00461	1.5248	34.8708
5.33333	0.00484	1.53811	36.3956
5.36111	0.00448	1.52303	37.9337
5.38889	0.00397	1.55311	39.4567
5.41667	0.00564	1.48817	41.0099
5.44444	0.00513	1.37043	42.498
5.47222	0.00392	1.1209	43.8685
5.5	0.00483	1.00657	44.9894
5.52778	0.00559	0.86502	45.9959
5.55556	0.00481	0.75966	46.861
5.58333	0.00367	0.71503	47.6206
5.61111	0.00369	0.62472	48.3356
5.63889	0.00415	0.58059	48.9604
5.66667	0.00204	0.52895	49.541
5.69444	0.00106	0.53122	50.0699
5.72222	0.00152	0.47278	50.6011
5.75	0.00234	0.41841	51.0739
5.77778	0.00218	0.40341	51.4923
5.80556	0.00116	0.36204	51.8957
5.83333	0.000911	0.35159	52.2578
5.86111	0.000123	0.36682	52.6094
5.88889	-0.00203	0.34009	52.9762
5.91667	0.00139	0.31601	53.3163
5.94444	-0.00052	0.29345	53.6323
5.97222	-0.000523	0.28306	53.9257
6	-0.00366	0.27826	54.2088
6.02778	-0.00251	0.27532	54.487
6.05556	-0.00483	0.24135	54.7624
6.08333	-0.00224	0.23396	55.0037
6.11111	-0.00281	0.22678	55.2377
6.13889	-0.00321	0.20867	55.4644
6.16667	-0.00318	0.21368	55.6731
6.19444	-0.00417	0.19473	55.8868
6.22222	-0.00176	0.19516	56.0815
6.25	-0.00382	0.18646	56.2767
6.27778	-0.0025	0.17701	56.4632
6.30556	-0.00385	0.15909	56.6402
6.33333	-0.00148	0.14988	56.7993
6.36111	-0.00717	0.15715	56.9492
6.38889	-0.00286	0.14854	57.1063
6.41667	-0.00278	0.14202	57.2548
6.44444	-0.006	0.13544	57.3969
6.47222	-0.00175	0.13228	57.5323
6.5	-0.0043	0.11589	57.6646
6.52778	-0.00122	0.11	57.7805
6.55556	-0.00265	0.10282	57.8905
6.58333	-0.00502	0.0956	57.9933
6.61111	-0.00439	0.10459	58.0889
6.63889	-0.00113	0.09775	58.1935
6.66667	-0.00249	0.10027	58.2912
6.69444	-0.00412	0.08204	58.3915
6.72222	-0.00478	0.0855	58.4735
6.75	-0.00233	0.08157	58.559
6.77778	-0.00273	0.06272	58.6406
6.80556	-0.00204	0.07058	58.7033
6.83333	-0.00411	0.05837	58.7739
6.86111	-0.0014	0.05882	58.8323
6.88889	-0.00209	0.07275	58.8911
6.91667	-0.00408	0.06448	58.9638
6.94444	-0.00287	0.0488	59.0283
6.97222	-0.00119	0.05925	59.0771
7	-0.00127	0.05331	59.1364
7.02778	-0.00484	0.05581	59.1897
7.05556	-0.0011	0.04227	59.2455
7.08333	-0.00198	0.04531	59.2878
7.11111	-0.00336	0.04794	59.3331
7.13889	-0.00162	0.05214	59.381
7.16667	-0.00333	0.00783	59.4331
7.19444	-0.00145	0.05635	59.441
7.22222	-0.00223	0.00964	59.4973
7.25	-0.00138	0.04723	59.507
7.27778	-0.000782	0.02398	59.5542
7.30556	-0.00168	0.04116	59.5782
7.33333	0.000213	0.02702	59.6193
7.36111	-0.000131	0.03984	59.6464
7.38889	-0.00115	0.00392	59.6862
7.41667	-0.000613	0.04645	59.6901
7.44444	-0.00274	0.01388	59.7366
7.47222	-0.00275	0.04169	59.7504
7.5	-0.00442	0.02168	59.7921
7.52778	-0.00418	0.02432	59.8138
7.55556	-0.00339	0.0334	59.8381
7.58333	-0.00403	0.00348	59.8715
7.61111	-0.00186	0.000437	59.875
7.63889	-0.00299	0.01741	59.8754
7.66667	-0.00252	0.04204	59.8929
7.69444	-0.000767	0.00261	59.9349
7.72222	-0.00468	0.01419	59.9375
7.75	-0.00144	0.02436	59.9517
7.77778	-0.00288	0.01523	59.9761
7.80556
7.83333
7.86111
7.88889
7.91667
7.94444
7.97222
8
8.02778
8.05556
8.08333
8.11111
8.13889
8.16667
8.19444
8.22222
8.25
8.27778
8.30556
8.33333
8.36111
8.38889
8.41667
8.44444
8.47222
8.5
8.52778
8.55556
8.58333
8.61111
8.63889
8.66667
8.69444
8.72222
8.75
8.77778
8.80556
8.83333
8.86111
8.88889
8.91667
8.94444
8.97222
9
9.02778
9.05556
9.08333
9.11111
9.13889
9.16667
9.19444
9.22222
9.25
9.27778
9.30556
9.33333
9.36111
9.38889
9.41667
9.44444
9.47222
9.5
9.52778
9.55556
9.58333
9.61111
9.63889
9.66667
9.69444
9.72222
9.75
9.77778
9.80556
9.83333
9.86111
9.88889
9.91667
9.94444
9.97222
10
10.0278
10.0556
10.0833
10.1111
10.1389
10.1667
10.1944
10.2222
10.25
10.2778
10.3056
10.3333
10.3611
10.3889
10.4167
10.4444
10.4722
10.5
10.5278
10.5556
10.5833
10.6111
10.6389

## Sheet: Fig5a-2
0.02778	-0.0024	-0.88026	0.02778	-0.0022	-0.34992	0.02778	-0.000149	0.06579	0.02778	-0.00717	-0.76191	0.02778	-0.00659	-0.74084
0.05556	-0.000294	-0.48664	0.05556	-0.00377	-0.38796	0.05556	0.000476	0.05794	0.05556	-0.000633	-0.23054	0.05556	-0.00511	-0.74318
0.08333	-0.00044	-0.28355	0.08333	-0.00313	-0.41859	0.08333	-5.4e-05	0.03357	0.08333	-0.00408	-0.17653	0.08333	-0.00363	-0.60348
0.11111	-0.00116	-0.2685	0.11111	-0.00404	-0.40764	0.11111	-0.00101	0.0426	0.11111	-0.000213	-0.16419	0.11111	-0.000508	-0.47001
0.13889	5.9e-05	-0.1547	0.13889	-0.00224	-0.44174	0.13889	-0.0004	0.00349	0.13889	0.00398	-0.05531	0.13889	-0.00434	-0.32153
0.16667	0.000194	-0.16542	0.16667	-0.00305	-0.45123	0.16667	-0.00015	0.00174	0.16667	0.00439	-0.05168	0.16667	-0.00282	-0.20163
0.19444	-0.00107	-0.22776	0.19444	-0.00312	-0.49304	0.19444	-9e-06	0.000865	0.19444	0.00187	-0.10628	0.19444	-0.00157	-0.13006
0.22222	-0.000879	-0.25331	0.22222	-0.00293	-0.43515	0.22222	8.1e-05	0.000437	0.22222	-0.00089	-0.14071	0.22222	0.00304	-0.04387
0.25	-0.000718	-0.2774	0.25	-0.00203	-0.47907	0.25	-0.000842	0.06303	0.25	0.0018	-0.15772	0.25	0.00266	0.00211
0.27778	-9.9e-05	-0.28011	0.27778	-0.00216	-0.45307	0.27778	-0.000379	0.06897	0.27778	0.00269	-0.1882	0.27778	-0.00399	0.02077
0.30556	0.000633	-0.24326	0.30556	-0.00169	-0.4866	0.30556	-0.00151	-0.10496	0.30556	-0.00162	-0.19436	0.30556	-0.00305	0.03962
0.33333	-0.000418	-0.00536	0.33333	-2.2e-05	-0.12261	0.33333	-0.000501	-0.81544	0.33333	-0.00719	-0.05597	0.33333	-0.00164	-0.09284
0.36111	0.000866	0.17879	0.36111	0.000657	0.03574	0.36111	-0.00298	-1.25471	0.36111	0.000525	0.09431	0.36111	0.00193	-1.14581
0.38889	-0.000922	-0.14922	0.38889	0.000334	-0.27121	0.38889	-0.00362	-1.26752	0.38889	0.000121	-0.10333	0.38889	-0.01369	-2.07869
0.41667	-0.00177	-0.99227	0.41667	-0.00361	-1.14362	0.41667	-0.00383	-1.26817	0.41667	-0.00367	-1.19233	0.41667	-0.01396	-2.46804
0.44444	-0.00118	-0.85168	0.44444	-0.00323	-1.08207	0.44444	-0.00274	-1.25685	0.44444	-0.01177	-2.15183	0.44444	-0.01555	-2.61757
0.47222	-0.000122	-0.64274	0.47222	-0.00519	-0.97239	0.47222	-0.00438	-1.26393	0.47222	-0.01083	-2.48306	0.47222	-0.0158	-2.66759
0.5	-0.000607	-0.49438	0.5	-0.00552	-0.89374	0.5	-0.00489	-1.26788	0.5	-0.0133	-2.58764	0.5	-0.01675	-2.58171
0.52778	-0.000426	-0.4136	0.52778	-0.000913	-0.81641	0.52778	-0.0031	-1.24293	0.52778	-0.01255	-2.60375	0.52778	-0.01412	-2.51989
0.55556	3.8e-05	-0.36465	0.55556	-0.00236	-0.79756	0.55556	-0.00306	-1.2856	0.55556	-0.01147	-2.53811	0.55556	-0.01222	-2.44789
0.58333	-0.000759	-0.31948	0.58333	-0.00197	-0.74106	0.58333	-0.00543	-1.32744	0.58333	-0.01079	-2.46387	0.58333	-0.017	-2.31703
0.61111	1.5e-05	-0.30312	0.61111	-0.00324	-0.71928	0.61111	-0.00505	-1.4007	0.61111	-0.01236	-2.32986	0.61111	-0.02105	-2.14891
0.63889	-0.000128	-0.25919	0.63889	-0.00558	-0.73499	0.63889	-0.00528	-1.42756	0.63889	-0.0138	-2.18083	0.63889	-0.01768	-2.00328
0.66667	-0.000766	-0.28984	0.66667	-0.00297	-0.75578	0.66667	-0.00761	-1.48298	0.66667	-0.01316	-2.01565	0.66667	-0.01709	-1.89825
0.69444	-0.00105	-0.30104	0.69444	-0.00262	-0.76763	0.69444	-0.00665	-1.48319	0.69444	-0.01133	-1.86726	0.69444	-0.0129	-1.79951
0.72222	0.000723	-0.31803	0.72222	-0.00259	-0.78853	0.72222	-0.00748	-1.49778	0.72222	-0.01064	-1.76796	0.72222	-0.00943	-1.74088
0.75	-0.000149	-0.32889	0.75	-0.00492	-0.7672	0.75	-0.00605	-1.53985	0.75	-0.00949	-1.69031	0.75	-0.0148	-1.67379
0.77778	-0.0002	-0.33656	0.77778	-0.00253	-0.78288	0.77778	-0.00674	-1.55006	0.77778	-0.00916	-1.6224	0.77778	-0.00989	-1.61718
0.80556	-0.000679	-0.32979	0.80556	-0.00131	-0.79852	0.80556	-0.00739	-1.56052	0.80556	-0.01348	-1.60678	0.80556	-0.01235	-1.60557
0.83333	-2.4e-05	-0.3335	0.83333	-0.00445	-0.80359	0.83333	-0.00915	-1.57933	0.83333	-0.01261	-1.52929	0.83333	-0.01112	-1.55219
0.86111	-9.3e-05	-0.34152	0.86111	-0.00147	-0.8003	0.86111	-0.00826	-1.57156	0.86111	-0.01404	-1.4803	0.86111	-0.00999	-1.51941
0.88889	-0.000384	-0.33746	0.88889	-0.00327	-0.80858	0.88889	-0.00708	-1.54298	0.88889	-0.01344	-1.44534	0.88889	-0.01124	-1.48251
0.91667	-0.00013	-0.34411	0.91667	-0.00496	-0.77666	0.91667	-0.00751	-1.51956	0.91667	-0.01111	-1.43027	0.91667	-0.01042	-1.48308
0.94444	-0.000424	-0.34185	0.94444	-0.00415	-0.80674	0.94444	-0.0054	-1.47951	0.94444	-0.00897	-1.4148	0.94444	-0.009	-1.48045
0.97222	-0.000265	-0.33363	0.97222	-0.00575	-0.78099	0.97222	-0.00696	-1.45994	0.97222	-0.0072	-1.37972	0.97222	-0.01146	-1.46304
1	0.000256	-0.34284	1	-0.00752	-0.79364	1	-0.00884	-1.4205	1	-0.01067	-1.36857	1	-0.0132	-1.44594
1.02778	9.8e-05	-0.33558	1.02778	-0.00424	-0.82017	1.02778	-0.00448	-1.3462	1.02778	-0.0071	-1.31357	1.02778	-0.00854	-1.41071
1.05556	-0.000551	-0.33684	1.05556	-0.00404	-0.81859	1.05556	-0.00592	-1.35641	1.05556	-0.00885	-1.31992	1.05556	-0.00987	-1.36168
1.08333	1.3e-05	-0.33022	1.08333	-0.00656	-0.80946	1.08333	-0.00538	-1.32481	1.08333	-0.01117	-1.31887	1.08333	-0.00836	-1.2221
1.11111	-0.00142	-0.32757	1.11111	-0.00502	-0.83208	1.11111	-0.0043	-1.28151	1.11111	-0.00731	-1.27633	1.11111	-0.00792	-1.00334
1.13889	-0.000117	-0.32917	1.13889	-0.00537	-0.81598	1.13889	-0.00665	-1.26426	1.13889	-0.00472	-1.2792	1.13889	-0.00709	-0.81295
1.16667	-0.000337	-0.32195	1.16667	-0.00511	-0.82176	1.16667	-0.00619	-1.23378	1.16667	-0.00808	-1.27178	1.16667	-0.00679	-0.68152
1.19444	-0.000521	-0.32542	1.19444	-0.00482	-0.80813	1.19444	-0.00502	-1.25375	1.19444	-0.00456	-1.23016	1.19444	-0.00458	-0.63557
1.22222	-0.000735	-0.32808	1.22222	-0.00488	-0.80902	1.22222	-0.00407	-1.19358	1.22222	-0.00788	-1.1185	1.22222	-0.00412	-0.52207
1.25	-0.00172	-0.34173	1.25	-0.00286	-0.81686	1.25	-0.00801	-1.21526	1.25	-0.00755	-0.98875	1.25	-0.00199	-0.48045
1.27778	-0.00028	-0.34597	1.27778	-0.00544	-0.80858	1.27778	-0.00549	-1.11869	1.27778	-0.00658	-0.83393	1.27778	-0.00554	-0.41313
1.30556	0.000164	-0.34692	1.30556	-0.00392	-0.8051	1.30556	-0.00348	-1.13809	1.30556	-0.00754	-0.63589	1.30556	-0.00205	-0.36465
1.33333	-0.000839	-0.34121	1.33333	-0.00492	-0.80973	1.33333	-0.00485	-1.13607	1.33333	-0.00516	-0.54064	1.33333	-0.00117	-0.34252
1.36111	-0.000833	-0.33209	1.36111	-0.00604	-0.78673	1.36111	-0.00611	-1.11276	1.36111	-0.00192	-0.49143	1.36111	0.00138	-0.30235
1.38889	-0.000244	-0.33196	1.38889	-0.00698	-0.79857	1.38889	-0.00274	-1.10437	1.38889	0.000751	-0.44689	1.38889	-0.00346	-0.28841
1.41667	-0.00112	-0.32461	1.41667	-0.00519	-0.81555	1.41667	-0.00343	-1.08372	1.41667	0.000641	-0.34723	1.41667	-0.00324	-0.2741
1.44444	-0.000752	-0.3256	1.44444	-0.00522	-0.83057	1.44444	-0.00322	-1.06341	1.44444	-1.4e-05	-0.34018	1.44444	-0.000636	-0.24393
1.47222	0.000862	-0.32983	1.47222	-0.00662	-0.82165	1.47222	-0.00346	-0.98939	1.47222	0.00134	-0.32325	1.47222	-0.000709	-0.25617
1.5	-0.000911	-0.33501	1.5	-0.00282	-0.80092	1.5	-0.00386	-0.88117	1.5	0.00293	-0.29091	1.5	0.000593	-0.22829
1.52778	-0.000567	-0.32499	1.52778	-0.00515	-0.8091	1.52778	-0.00414	-0.68721	1.52778	0.000165	-0.26697	1.52778	-0.0031	-0.21672
1.55556	-0.000862	-0.32238	1.55556	-0.00364	-0.80788	1.55556	-0.00296	-0.59226	1.55556	-0.00224	-0.25152	1.55556	0.00119	-0.21395
1.58333	-0.0012	-0.32979	1.58333	-0.00225	-0.80501	1.58333	-0.0021	-0.53007	1.58333	-0.000222	-0.22474	1.58333	-0.01217	-0.18678
1.61111	-0.000583	-0.32397	1.61111	-0.00437	-0.81834	1.61111	-0.00295	-0.45886	1.61111	0.00134	-0.23918	1.61111	0.00238	-0.17389
1.63889	-0.000328	-0.35986	1.63889	-0.00348	-0.82503	1.63889	-0.00231	-0.3878	1.63889	0.000804	-0.22526	1.63889	0.00251	-0.17601
1.66667	-0.000756	-0.33428	1.66667	-0.00468	-0.82513	1.66667	0.00215	-0.31906	1.66667	0.00222	-0.18298	1.66667	-0.000428	-0.15947
1.69444	-6.3e-05	-0.32979	1.69444	-0.00417	-0.82208	1.69444	0.00136	-0.31074	1.69444	0.00309	-0.18429	1.69444	0.00145	-0.15998
1.72222	-0.000511	-0.33274	1.72222	-0.00262	-0.81512	1.72222	0.000146	-0.26835	1.72222	0.00376	-0.17905	1.72222	0.00151	-0.15072
1.75	-0.000811	-0.35187	1.75	-0.00465	-0.83576	1.75	-0.00188	-0.25311	1.75	0.00382	-0.17073	1.75	0.00221	-0.13631
1.77778	-0.00192	-0.32102	1.77778	-0.00148	-0.82648	1.77778	9.9e-05	-0.24747	1.77778	0.00645	-0.14666	1.77778	0.00163	-0.13141
1.80556	-0.000812	-0.32702	1.80556	-0.00383	-0.83166	1.80556	-0.000625	-0.23566	1.80556	0.00409	-0.16025	1.80556	-0.00258	-0.12156
1.83333	-0.000681	-0.33588	1.83333	-0.00403	-0.84516	1.83333	0.000175	-0.19674	1.83333	0.00605	-0.14768	1.83333	-0.000259	-0.12175
1.86111	-0.000293	-0.33761	1.86111	-0.00582	-0.82251	1.86111	-0.000331	-0.19166	1.86111	0.000395	-0.13418	1.86111	0.00205	-0.09629
1.88889	-0.000879	-0.32674	1.88889	-0.00443	-0.84043	1.88889	-0.00215	-0.19082	1.88889	0.000732	-0.12808	1.88889	0.000375	-0.0969
1.91667	-0.000496	-0.33133	1.91667	-0.00122	-0.8195	1.91667	0.00087	-0.17819	1.91667	0.00688	-0.13985	1.91667	0.00423	-0.09936
1.94444	-0.000318	-0.31323	1.94444	-0.00234	-0.84335	1.94444	0.00115	-0.17307	1.94444	0.00239	-0.11197	1.94444	0.00209	-0.11284
1.97222	-0.000599	-0.32456	1.97222	-0.00309	-0.82383	1.97222	0.00288	-0.14855	1.97222	0.00379	-0.0941	1.97222	0.000806	-0.10056
2	-0.00115	-0.3255	2	-0.0022	-0.82382	2	0.000258	-0.14846	2	0.00229	-0.11068	2	-0.00279	-0.08614
2.02778	-0.00129	-0.35955	2.02778	-0.00415	-0.82383	2.02778	0.000294	-0.14842	2.02778	0.00162	-0.08429	2.02778	0.00206	-0.0879
2.05556	-0.000302	-0.34513	2.05556	-0.00147	-0.81425	2.05556	0.00159	-0.14593	2.05556	0.00501	-0.08582	2.05556	-0.00183	-0.06578
2.08333	-0.001	-0.33774	2.08333	-0.00287	-0.83945	2.08333	0.000396	-0.12504	2.08333	0.000852	-0.08624	2.08333	0.000811	-0.06492
2.11111	-0.00182	-0.34154	2.11111	-0.00477	-0.83978	2.11111	0.00244	-0.11675	2.11111	0.00527	-0.07058	2.11111	-0.00123	-0.07057
2.13889	-0.000592	-0.32666	2.13889	-0.00259	-0.83948	2.13889	0.00181	-0.12069	2.13889	0.00369	-0.08697	2.13889	0.000737	-0.06752
2.16667	-0.00146	-0.33226	2.16667	0.000229	-0.87481	2.16667	0.000961	-0.09847	2.16667	0.00508	-0.07312	2.16667	0.00166	-0.07668
2.19444	-0.000873	-0.32107	2.19444	-0.00381	-0.86043	2.19444	0.000938	-0.11737	2.19444	0.00578	-0.07188	2.19444	0.00327	-0.06186
2.22222	-0.000726	-0.32504	2.22222	-0.00134	-0.87523	2.22222	0.00268	-0.07536	2.22222	0.00232	-0.0697	2.22222	0.00296	-0.05708
2.25	-0.000974	-0.3167	2.25	-0.00147	-0.86523	2.25	0.00367	-0.07784	2.25	0.00442	-0.07702	2.25	0.00464	-0.03225
2.27778	-0.000808	-0.33001	2.27778	-0.00312	-0.88002	2.27778	0.00141	-0.08967	2.27778	0.00731	-0.07074	2.27778	0.00171	-0.06182
2.30556	-0.000646	-0.32716	2.30556	-0.00594	-0.83683	2.30556	0.000547	-0.09137	2.30556	0.00348	-0.05829	2.30556	0.0033	-0.05514
2.33333	-0.000223	-0.32455	2.33333	-0.00265	-0.80827	2.33333	0.00207	-0.09747	2.33333	0.00868	-0.06056	2.33333	0.0044	-0.03443
2.36111	-0.00101	-0.33596	2.36111	-1.5e-05	-0.62747	2.36111	0.00109	-0.07667	2.36111	0.00099	-0.03487	2.36111	-2.4e-05	-0.03064
2.38889	-0.00152	-0.31862	2.38889	-0.00203	-0.5112	2.38889	0.00206	-0.07727	2.38889	0.00358	-0.05272	2.38889	0.00492	-0.04887
2.41667	-0.000774	-0.31847	2.41667	-0.00128	-0.40937	2.41667	0.000684	-0.06241	2.41667	0.00493	-0.04225	2.41667	0.00274	-0.01319
2.44444	-0.00087	-0.32412	2.44444	-0.00272	-0.35642	2.44444	0.000871	-0.05419	2.44444	0.00862	-0.04031	2.44444	0.000776	-0.04935
2.47222	-0.00111	-0.32674	2.47222	-0.00266	-0.30346	2.47222	0.000145	-0.0623	2.47222	0.00362	-0.02616	2.47222	0.0004	-0.03139
2.5	-0.000492	-0.32804	2.5	-0.000715	-0.2553	2.5	0.00012	-0.05707	2.5	0.00548	-0.05287	2.5	0.0034	-0.04339
2.52778	-0.000536	-0.32168	2.52778	-0.00255	-0.23177	2.52778	-0.000727	-0.0536	2.52778	0.0081	-0.05409	2.52778	0.000709	0.09606
2.55556	-0.000896	-0.31551	2.55556	-0.00273	-0.1991	2.55556	0.000791	-0.06013	2.55556	0.00433	-0.03094	2.55556	0.00664	1.49829
2.58333	0.000488	-0.31013	2.58333	-0.00144	-0.17601	2.58333	0.00291	-0.06012	2.58333	0.00163	-0.04477	2.58333	0.0186	2.83129
2.61111	-0.00128	-0.32283	2.61111	0.00132	-0.17639	2.61111	0.00354	-0.03747	2.61111	0.0045	-0.02299	2.61111	0.02795	3.72825
2.63889	-0.000686	-0.33241	2.63889	-0.000162	-0.16625	2.63889	0.00178	-0.05577	2.63889	0.0043	-0.04081	2.63889	0.03367	4.30447
2.66667	-0.000401	-0.31889	2.66667	0.00106	-0.17296	2.66667	0.000406	-0.04716	2.66667	0.00674	-0.03434	2.66667	0.03436	4.72261
2.69444	0.000604	-0.32107	2.69444	-0.00246	-0.14477	2.69444	-0.000242	-0.01699	2.69444	0.00775	-0.02642	2.69444	0.03624	5.07
2.72222	-0.000759	-0.32725	2.72222	0.00216	-0.12939	2.72222	0.0047	-0.04826	2.72222	0.000304	-0.0322	2.72222	0.03389	5.13546
2.75	-5.4e-05	-0.31513	2.75	-0.000195	-0.12373	2.75	-0.000505	-0.01293	2.75	0.00777	-0.01637	2.75	0.04319	5.11976
2.77778	0.00051	-0.31977	2.77778	0.000237	-0.12808	2.77778	-0.000545	-0.0409	2.77778	0.00724	-0.01393	2.77778	0.04023	5.09894
2.80556	-0.000575	-0.31846	2.80556	-0.00158	-0.1307	2.80556	0.000676	-0.02727	2.80556	0.0046	-0.00218	2.80556	0.03529	5.14344
2.83333	-0.000419	-0.32673	2.83333	-2.5e-05	-0.11022	2.83333	0.00143	-0.04702	2.83333	0.00504	0.04548	2.83333	0.03855	5.11483
2.86111	-0.00112	-0.33981	2.86111	-0.000432	-0.10806	2.86111	0.00173	-0.01156	2.86111	0.00671	0.71181	2.86111	0.03949	5.04654
2.88889	-0.000762	-0.32734	2.88889	0.000814	-0.08779	2.88889	0.00216	-0.0353	2.88889	0.01341	1.20623	2.88889	0.03869	4.45861
2.91667	-0.000291	-0.3242	2.91667	-1.6e-05	-0.09975	2.91667	0.000362	-0.02807	2.91667	0.01783	1.52162	2.91667	0.03862	3.77361
2.94444	0.000456	-0.32062	2.94444	0.000352	-0.08258	2.94444	0.00251	-0.03793	2.94444	0.01575	1.79147	2.94444	0.02696	3.21297
2.97222	-0.00116	-0.30279	2.97222	0.00153	-0.08275	2.97222	0.00172	-0.02195	2.97222	0.02225	1.95165	2.97222	0.0175	2.67811
3	-0.00194	-0.31803	3	0.00141	-0.08102	3	0.00304	-0.03405	3	0.01619	2.1027	3	0.01263	2.2766
3.02778	-0.00144	-0.32543	3.02778	-0.00246	-0.071	3.02778	0.00201	-0.02584	3.02778	0.02104	2.19034	3.02778	0.01158	1.88483
3.05556	-0.00118	-0.32108	3.05556	0.000241	-0.07841	3.05556	0.00184	-0.0084	3.05556	0.01672	2.29713	3.05556	0.00845	1.69152
3.08333	0.00038	-0.32413	3.08333	-0.000257	-0.07331	3.08333	0.0017	-0.03625	3.08333	0.01601	2.33253	3.08333	0.00543	1.59302
3.11111	-0.000857	-0.3305	3.11111	-0.00108	-0.06938	3.11111	0.00187	-0.0148	3.11111	0.01798	2.39476	3.11111	0.00822	1.42092
3.13889	-0.000417	-0.33495	3.13889	0.000495	-0.06752	3.13889	-0.000565	-0.00392	3.13889	0.01712	2.38262	3.13889	0.00643	1.29663
3.16667	-0.00109	-0.32673	3.16667	0.000742	-0.05015	3.16667	0.0015	-0.00131	3.16667	0.01767	2.42855	3.16667	0.01336	1.22424
3.19444	-0.000502	-0.32643	3.19444	0.00219	-0.06159	3.19444	0.00147	-0.00305	3.19444	0.0218	2.46673	3.19444	0.00985	1.05885
3.22222	-0.000879	-0.32117	3.22222	-0.000194	-0.05881	3.22222	0.00111	-0.03333	3.22222	0.02199	2.5088	3.22222	0.0071	0.92185
3.25	-0.000475	-0.32543	3.25	0.00111	-0.03007	3.25	0.00351	-0.01088	3.25	0.02808	2.47615	3.25	0.00297	0.9149
3.27778	4.4e-05	-0.33065	3.27778	-3.2e-05	-0.04618	3.27778	0.00103	-0.01481	3.27778	0.0215	2.48801	3.27778	0.00267	0.84411
3.30556	-0.000298	-0.32064	3.30556	0.00069	-0.0525	3.30556	0.00108	-0.00609	3.30556	0.02084	2.54104	3.30556	0.00365	0.76284
3.33333	0.000112	-0.32542	3.33333	-0.000474	-0.04358	3.33333	0.000455	-0.00872	3.33333	0.02218	2.62822	3.33333	0.000658	0.69486
3.36111	-0.00125	-0.32262	3.36111	-0.00172	-0.03965	3.36111	0.0013	-0.03232	3.36111	0.01798	2.66579	3.36111	0.00291	0.68398
3.38889	-0.00014	-0.33108	3.38889	0.00132	-0.04305	3.38889	0.00189	-0.01145	3.38889	0.02291	2.61019	3.38889	0.00812	0.65366
3.41667	-0.000685	-0.32283	3.41667	0.000657	-0.0417	3.41667	7.1e-05	-0.00349	3.41667	0.01581	2.64718	3.41667	0.00541	0.60941
3.44444	-0.000468	-0.33769	3.44444	0.00133	-0.03138	3.44444	0.00247	0.00391	3.44444	0.0202	2.64919	3.44444	0.00507	0.6179
3.47222	-0.00109	-0.33821	3.47222	-6.8e-05	-0.04452	3.47222	0.00177	-0.00435	3.47222	0.02134	2.73177	3.47222	0.00514	0.58101
3.5	-0.000583	-0.33067	3.5	-0.000751	-0.01089	3.5	0.00468	-0.000436	3.5	0.02056	2.70457	3.5	0.00505	0.5499
3.52778	-0.000499	-0.32402	3.52778	0.0019	-0.03871	3.52778	0.00096	-0.01151	3.52778	0.02012	2.74526	3.52778	0.00347	0.51885
3.55556	0.000207	-0.33099	3.55556	-0.000786	-0.01943	3.55556	0.00118	-0.00918	3.55556	0.01911	2.74508	3.55556	0.00286	0.47748
3.58333	-0.000365	-0.32934	3.58333	-0.000928	-0.01175	3.58333	0.000912	-0.00436	3.58333	0.01794	2.68729	3.58333	0.00252	0.48994
3.61111	-0.000268	-0.31803	3.61111	-0.00173	-0.04988	3.61111	0.00229	0.0048	3.61111	0.01508	2.69018	3.61111	-0.00124	0.43174
3.63889	-0.00022	-0.32757	3.63889	0.000331	-0.00525	3.63889	0.00374	-0.03048	3.63889	0.01074	2.67868	3.63889	-0.00234	0.4191
3.66667	-0.000645	-0.34398	3.66667	-0.000162	-0.04724	3.66667	0.000171	-0.00741	3.66667	0.00785	2.42915	3.66667	-0.00121	0.41825
3.69444	-0.00155	-0.33152	3.69444	-0.00119	-0.01355	3.69444	-0.000578	0.00349	3.69444	0.01047	1.97166	3.69444	0.00304	0.39686
3.72222	-0.000242	-0.33066	3.72222	0.00164	-0.02194	3.72222	0.0033	-0.0074	3.72222	0.00641	1.69752	3.72222	-0.00111	0.3995
3.75	0.000213	-0.32677	3.75	0.00192	-0.03571	3.75	0.00264	0.08023	3.75	0.01227	1.73127	3.75	-0.00367	0.36504
3.77778	0.000788	-0.3223	3.77778	0.00228	-0.00261	3.77778	0.00222	0.2932	3.77778	0.01266	1.58424	3.77778	-0.00384	0.33114
3.80556	1.2e-05	-0.32336	3.80556	0.00143	-0.01045	3.80556	0.00303	0.50474	3.80556	0.0109	1.36848	3.80556	-0.00337	0.33083
3.83333	0.00142	-0.31864	3.83333	0.00228	-0.0296	3.83333	0.00477	0.68195	3.83333	0.01207	1.22032	3.83333	-0.00292	0.28919
3.86111	0.000839	-0.32194	3.86111	0.000917	-0.00495	3.86111	0.0051	0.83815	3.86111	0.00737	1.10353	3.86111	-0.00369	0.29436
3.88889	0.000585	-0.31585	3.88889	0.000697	-0.00966	3.88889	0.00562	0.92115	3.88889	0.0047	0.95536	3.88889	-0.00085	0.28656
3.91667	0.00115	-0.33732	3.91667	0.00151	-0.00262	3.91667	0.00493	1.01372	3.91667	0.00633	0.81069	3.91667	-0.00628	0.26783
3.94444	0.00106	-0.33337	3.94444	0.000559	-0.00609	3.94444	0.00703	1.08325	3.94444	0.00433	0.77442	3.94444	-0.00134	0.263
3.97222	-0.000439	-0.3311	3.97222	0.00178	-0.00153	3.97222	0.00596	1.14273	3.97222	0.00575	0.70342	3.97222	-0.00169	0.23879
4	0.000606	-0.32411	4	0.00264	-0.00392	4	0.00442	1.26863	4	0.0076	0.6394	4	-0.00269	0.22539
4.02778	0.000472	-0.31455	4.02778	0.00112	-0.0144	4.02778	0.00905	1.55213	4.02778	0.00495	0.62629	4.02778	0.000143	0.22614
4.05556	0.000944	-0.33195	4.05556	0.000582	-0.01562	4.05556	0.00846	1.41401	4.05556	0.00636	0.60544	4.05556	-0.00396	0.22803
4.08333	7.2e-05	-0.32304	4.08333	0.00089	-0.01142	4.08333	0.00688	1.29392	4.08333	0.00476	0.57712	4.08333	-0.0032	0.2174
4.11111	0.00065	-0.3237	4.11111	0.000518	-0.00908	4.11111	0.00641	1.27704	4.11111	0.0052	0.54117	4.11111	-0.000193	0.19646
4.13889	0.000207	-0.32108	4.13889	0.000534	-0.00348	4.13889	0.00772	1.25687	4.13889	0.00643	0.52277	4.13889	-0.00424	0.17863
4.16667	0.000114	-0.34639	4.16667	-0.00105	-0.00174	4.16667	0.00336	1.24381	4.16667	0.004	0.49316	4.16667	-0.00237	0.1686
4.19444	0.000509	-0.33549	4.19444	1.4e-05	0	4.19444	0.00413	1.27645	4.19444	0.00459	0.48662	4.19444	-0.00571	0.14815
4.22222	-0.000494	-0.35017	4.22222	0.00243	-0.000868	4.22222	0.00393	1.26205	4.22222	0.00256	0.43917	4.22222	-0.00509	0.17875
4.25	-0.000269	-0.32064	4.25	-0.000601	-0.01215	4.25	0.00416	1.26456	4.25	0.00266	0.45262	4.25	-0.00278	0.14821
4.27778	-4.4e-05	-0.33209	4.27778	0.000849	-0.03816	4.27778	0.00362	1.28777	4.27778	0.00288	0.4156	4.27778	8.6e-05	0.15913
4.30556	0.00116	-0.34861	4.30556	-0.00108	-0.00393	4.30556	0.00481	1.30786	4.30556	0.00161	0.38772	4.30556	-0.00433	0.13636
4.33333	0.000344	-0.33848	4.33333	0.000225	0.11738	4.33333	0.00683	1.33834	4.33333	0.00182	0.39301	4.33333	-0.00698	0.13025
4.36111	0.000866	-0.33891	4.36111	0.00321	0.17515	4.36111	0.00414	1.35466	4.36111	-0.00236	0.37933	4.36111	-0.00396	0.13331
4.38889	0.000667	-0.33615	4.38889	0.000613	0.23874	4.38889	0.00354	1.37104	4.38889	-0.00241	0.33597	4.38889	-0.00503	0.12285
4.41667	-0.000173	-0.33458	4.41667	0.000895	0.288	4.41667	0.00485	1.38352	4.41667	0.000196	0.32045	4.41667	-0.0018	0.10892
4.44444	-0.000364	-0.35265	4.44444	0.000645	0.35271	4.44444	0.00564	1.43298	4.44444	-0.000956	0.27849	4.44444	-0.00173	0.10935
4.47222	0.00101	-0.35159	4.47222	0.00179	0.38468	4.47222	0.00762	1.6269	4.47222	0.00209	0.26716	4.47222	-0.00148	0.11522
4.5	0.00112	-0.34479	4.5	0.00202	0.43496	4.5	0.00494	1.52055	4.5	0.00161	0.26574	4.5	-2.6e-05	0.10325
4.52778	0.000538	-0.34291	4.52778	0.00355	0.4495	4.52778	0.00701	1.41903	4.52778	-0.00161	0.27315	4.52778	-0.000199	0.09604
4.55556	0.000359	-0.34039	4.55556	0.00198	0.47127	4.55556	0.00565	1.39748	4.55556	-0.00355	0.25441	4.55556	1.4e-05	0.09762
4.58333	-0.000217	-0.33991	4.58333	0.00384	0.48707	4.58333	0.00688	1.41208	4.58333	-0.00309	0.2579	4.58333	0.000442	0.08556
4.61111	0.000324	-0.34079	4.61111	0.00375	0.49365	4.61111	0.00346	1.40978	4.61111	0.00374	0.22698	4.61111	-0.00643	0.08407
4.63889	0.00044	-0.34777	4.63889	0.00315	0.50091	4.63889	0.00768	1.43588	4.63889	0.00178	0.21609	4.63889	0.000876	0.0735
4.66667	0.000338	-0.3399	4.66667	0.00162	0.49671	4.66667	0.00382	1.49562	4.66667	-0.00505	0.2213	4.66667	-0.00595	0.07876
4.69444	0.000454	-0.33344	4.69444	0.00329	0.52492	4.69444	0.00554	1.47033	4.69444	0.000312	0.19647	4.69444	-0.00321	0.07144
4.72222	-8.7e-05	-0.34246	4.72222	0.0032	0.53936	4.72222	0.00487	1.45248	4.72222	-0.00429	0.19631	4.72222	-0.00212	0.06753
4.75	3.5e-05	-0.3522	4.75	0.00146	0.57157	4.75	0.00566	1.48171	4.75	-0.00443	0.18815	4.75	0.000786	0.05751
4.77778	-0.000536	-0.35073	4.77778	0.00303	0.59297	4.77778	0.00467	1.49344	4.77778	-0.00313	0.17961	4.77778	-0.000249	0.03922
4.80556	1.5e-05	-0.33891	4.80556	0.00264	0.58699	4.80556	0.00326	1.48821	4.80556	-0.00116	0.17086	4.80556	-0.00201	0.03404
4.83333	0.000416	-0.33375	4.83333	0.00291	0.59126	4.83333	0.00523	1.51946	4.83333	-0.00455	0.17252	4.83333	-0.00301	0.02716
4.86111	8.2e-05	-0.34288	4.86111	0.00456	0.60742	4.86111	0.00486	1.48667	4.86111	-0.000669	0.16991	4.86111	-0.000295	0.05663
4.88889	0.000227	-0.33888	4.88889	0.00389	0.59957	4.88889	0.00742	1.52332	4.88889	-0.000643	0.15996	4.88889	0.00297	-0.68702
4.91667	0.000164	-0.33675	4.91667	0.00784	0.64539	4.91667	0.00674	1.4914	4.91667	-0.00319	0.1455	4.91667	-0.01299	-2.09587
4.94444	-0.000906	-0.32989	4.94444	0.00355	0.93689	4.94444	0.00322	1.49205	4.94444	-0.00405	0.12286	4.94444	-0.02115	-2.83421
4.97222	-0.000784	-0.33992	4.97222	0.00473	0.83106	4.97222	0.00268	1.4769	4.97222	-0.000373	0.10369	4.97222	-0.03136	-3.18255
5	0.00119	-0.33153	5	0.00248	0.60567	5	0.0021	1.44685	5	-0.00368	0.10457	5	-0.02454	-3.28899
5.02778	-0.00089	-0.33413	5.02778	0.005	0.55939	5.02778	0.00338	1.43679	5.02778	-0.000387	0.11348	5.02778	-0.02334	-3.29125
5.05556	-0.000118	-0.32473	5.05556	0.00246	0.55852	5.05556	0.00547	1.47381	5.05556	-0.00309	0.12155	5.05556	-0.02176	-3.078
5.08333	0.000234	-0.31853	5.08333	0.00197	0.55024	5.08333	0.0013	1.44289	5.08333	-0.000706	0.10761	5.08333	-0.01874	-2.91828
5.11111	-0.000146	-0.33065	5.11111	0.00252	0.5681	5.11111	0.00227	1.48257	5.11111	-0.00034	0.10015	5.11111	-0.01221	-2.70059
5.13889	-0.000272	-0.31977	5.13889	0.00203	0.57332	5.13889	-0.000498	1.49126	5.13889	6e-06	0.09046	5.13889	-0.02152	-2.55971
5.16667	-0.000793	-0.30627	5.16667	0.0046	0.57593	5.16667	0.00229	1.51442	5.16667	-0.00189	0.08183	5.16667	-0.0075	-2.45537
5.19444	0.000744	-0.32848	5.19444	0.00328	0.58167	5.19444	0.00326	1.53275	5.19444	-0.00573	0.07797	5.19444	-0.01564	-2.36372
5.22222	-0.000814	-0.32499	5.22222	0.005	0.59132	5.22222	0.000889	1.5223	5.22222	0.00312	0.09072	5.22222	-0.01145	-2.24014
5.25	0.00045	-0.31244	5.25	0.00324	0.59783	5.25	0.00255	1.50057	5.25	0.00262	0.08114	5.25	-0.00997	-2.1689
5.27778	-0.000239	-0.32515	5.27778	0.00173	0.60688	5.27778	0.00273	1.53857	5.27778	0.00165	0.07449	5.27778	-0.01323	-2.12158
5.30556	9e-05	-0.31151	5.30556	0.004	0.6317	5.30556	0.00461	1.5248	5.30556	-0.00136	0.07406	5.30556	-0.01696	-2.03574
5.33333	0.000106	-0.30888	5.33333	0.00281	0.66997	5.33333	0.00484	1.53811	5.33333	-0.00338	0.06554	5.33333	-0.01551	-1.97616
5.36111	-0.000524	-0.2716	5.36111	0.00429	0.64809	5.36111	0.00448	1.52303	5.36111	0.00108	0.07499	5.36111	-0.01373	-1.97321
5.38889	0.000717	-0.20736	5.38889	0.00267	0.60905	5.38889	0.00397	1.55311	5.38889	-4e-05	0.06139	5.38889	-0.01198	-1.89371
5.41667	0.000423	-0.17122	5.41667	0.00314	0.62473	5.41667	0.00564	1.48817	5.41667	0.000416	0.07625	5.41667	-0.01065	-1.88943
5.44444	0.000585	-0.1325	5.44444	0.00159	0.61822	5.44444	0.00513	1.37043	5.44444	0.000556	0.07187	5.44444	-0.01057	-1.87864
5.47222	0.000322	-0.12547	5.47222	0.00466	0.61315	5.47222	0.00392	1.1209	5.47222	-0.00333	0.05882	5.47222	-0.00794	-1.83395
5.5	0.000636	-0.09803	5.5	0.00312	0.63133	5.5	0.00483	1.00657	5.5	-0.00105	0.05663	5.5	-0.00851	-1.80705
5.52778	0.0015	-0.08538	5.52778	0.00426	0.60634	5.52778	0.00559	0.86502	5.52778	-0.00243	0.05003	5.52778	-0.01673	-1.76614
5.55556	0.000217	-0.08449	5.55556	0.00342	0.62696	5.55556	0.00481	0.75966	5.55556	-0.00377	0.04081	5.55556	-0.01475	-1.75045
5.58333	0.000827	-0.06665	5.58333	0.00237	0.61907	5.58333	0.00367	0.71503	5.58333	0.000548	0.02256	5.58333	-0.01837	-1.68427
5.61111	0.000648	-0.06928	5.61111	-0.00125	0.5985	5.61111	0.00369	0.62472	5.61111	-0.00258	-0.01428	5.61111	-0.01709	-1.66686
5.63889	0.00106	-0.06913	5.63889	0.00288	0.6254	5.63889	0.00415	0.58059	5.63889	-0.00257	0.02653	5.63889	-0.01579	-1.68552
5.66667	0.000237	-0.06788	5.66667	0.00346	0.63507	5.66667	0.00204	0.52895	5.66667	0.00571	0.07556	5.66667	-0.0132	-1.64352
5.69444	0.00035	-0.07233	5.69444	0.00255	0.64694	5.69444	0.00106	0.53122	5.69444	0.00246	-0.53433	5.69444	-0.01324	-1.62101
5.72222	0.000107	-0.05576	5.72222	0.00114	0.633	5.72222	0.00152	0.47278	5.72222	-0.00442	-1.23958	5.72222	-0.00763	-1.58143
5.75	-0.00114	-0.04707	5.75	0.00348	0.66303	5.75	0.00234	0.41841	5.75	-0.01151	-1.45174	5.75	-0.01543	-1.57278
5.77778	-2.9e-05	-0.05168	5.77778	0.000699	0.65307	5.77778	0.00218	0.40341	5.77778	-0.0141	-1.62233	5.77778	-0.00882	-1.56721
5.80556	0.000648	-0.05004	5.80556	0.00403	0.63912	5.80556	0.00116	0.36204	5.80556	-0.01523	-1.74698	5.80556	-0.01207	-1.53634
5.83333	0.000699	-0.01943	5.83333	0.00238	0.6587	5.83333	0.000911	0.35159	5.83333	-0.01423	-1.87243	5.83333	-0.01296	-1.49724
5.86111	0.000899	-0.05661	5.86111	0.00116	0.66048	5.86111	0.000123	0.36682	5.86111	-0.01253	-1.9773	5.86111	-0.0076	-1.50707
5.88889	0.000977	-0.03094	5.88889	0.0038	0.65627	5.88889	-0.00203	0.34009	5.88889	-0.01314	-2.08558	5.88889	-0.01334	-1.51402
5.91667	0.000996	-0.03266	5.91667	0.00386	0.66402	5.91667	0.00139	0.31601	5.91667	-0.01337	-2.19944	5.91667	-0.01065	-1.46113
5.94444	0.000692	-0.02117	5.94444	0.00354	0.66699	5.94444	-0.00052	0.29345	5.94444	-0.01465	-2.36104	5.94444	-0.00991	-1.47916
5.97222	0.000566	-0.04576	5.97222	0.00422	0.68399	5.97222	-0.000523	0.28306	5.97222	-0.00776	-2.43583	5.97222	-0.0096	-1.40911
6	0.000392	-0.05024	6	0.00234	0.69574	6	-0.00366	0.27826	6	-0.01081	-2.43842	6	-0.00975	-1.48382
6.02778	0.000869	-0.03058	6.02778	0.00414	0.75847	6.02778	-0.00251	0.27532	6.02778	-0.01424	-2.39872	6.02778	-0.012	-1.40194
6.05556	0.000158	-0.03932	6.05556	0.00284	0.767	6.05556	-0.00483	0.24135	6.05556	-0.00999	-2.39533	6.05556	-0.01094	-1.36792
6.08333	0.000364	-0.01146	6.08333	0.00071	0.67979	6.08333	-0.00224	0.23396	6.08333	-0.01485	-2.30289	6.08333	-0.00783	-1.33135
6.11111	0.000669	-0.03971	6.11111	-4.5e-05	0.63087	6.11111	-0.00281	0.22678	6.11111	-0.01227	-2.19837	6.11111	-0.00994	-1.1634
6.13889	0.00182	-0.01221	6.13889	0.000802	0.62081	6.13889	-0.00321	0.20867	6.13889	-0.01365	-2.09767	6.13889	-0.00406	-0.94983
6.16667	0.00113	-0.02042	6.16667	0.000765	0.63344	6.16667	-0.00318	0.21368	6.16667	-0.0125	-2.04018	6.16667	-0.00564	-0.7793
6.19444	-0.000431	-0.03946	6.19444	0.001	0.62778	6.19444	-0.00417	0.19473	6.19444	-0.01124	-1.98916	6.19444	-0.00648	-0.67722
6.22222	0.00103	-0.00392	6.22222	0.00147	0.62952	6.22222	-0.00176	0.19516	6.22222	-0.01206	-1.93908	6.22222	-0.00791	-0.60282
6.25	-7.1e-05	-0.0342	6.25	0.00301	0.6664	6.25	-0.00382	0.18646	6.25	-0.00897	-1.9003	6.25	-0.000626	-0.52547
6.27778	3.8e-05	-0.02482	6.27778	0.00143	0.66568	6.27778	-0.0025	0.17701	6.27778	-0.00735	-1.89027	6.27778	-0.00506	-0.47618
6.30556	-2.4e-05	-0.00261	6.30556	0.0022	0.69531	6.30556	-0.00385	0.15909	6.30556	-0.00937	-1.79649	6.30556	-0.00606	-0.43268
6.33333	0.000958	-0.0074	6.33333	0.00177	0.69443	6.33333	-0.00148	0.14988	6.33333	-0.01044	-1.77735	6.33333	-0.00233	-0.3762
6.36111	0.000528	-0.01644	6.36111	0.00086	0.66395	6.36111	-0.00717	0.15715	6.36111	-0.01115	-1.75982	6.36111	-0.00604	-0.33633
6.38889	7.8e-05	-0.03735	6.38889	0.00403	0.67033	6.38889	-0.00286	0.14854	6.38889	-0.00555	-1.72769	6.38889	-0.00392	-0.30797
6.41667	0.000499	-0.000872	6.41667	0.00145	0.66387	6.41667	-0.00278	0.14202	6.41667	-0.01078	-1.69327	6.41667	-0.00109	-0.29148
6.44444	0.00071	-0.00174	6.44444	2.8e-05	0.65463	6.44444	-0.006	0.13544	6.44444	-0.01005	-1.67595	6.44444	-0.00147	-0.28901
6.47222	0.00108	-0.00994	6.47222	0.00117	0.64867	6.47222	-0.00175	0.13228	6.47222	-0.0116	-1.66647	6.47222	-0.00334	-0.25965
6.5	0.00122	-0.04604	6.5	0.00328	0.66743	6.5	-0.0043	0.11589	6.5	-0.0078	-1.61404	6.5	-0.000154	-0.25442
6.52778	0.00114	-0.00348	6.52778	0.00192	0.66612	6.52778	-0.00122	0.11	6.52778	-0.01078	-1.59845	6.52778	9e-05	-0.2357
6.55556	0.00108	-0.00174	6.55556	0.00552	0.67244	6.55556	-0.00265	0.10282	6.55556	-0.01257	-1.56226	6.55556	-0.00529	-0.23265
6.58333	0.000447	3e-06	6.58333	0.00344	0.6718	6.58333	-0.00502	0.0956	6.58333	-0.01131	-1.55459	6.58333	-0.000627	-0.19766
6.61111	0.000817	-3e-06	6.61111	0.00479	0.66395	6.61111	-0.00439	0.10459	6.61111	-0.00959	-1.52048	6.61111	-0.00639	-0.19735
6.63889	0.000336	-0.02134	6.63889	0.0037	0.65158	6.63889	-0.00113	0.09775	6.63889	-0.01185	-1.53658	6.63889	-0.00213	-0.20693
6.66667	0.00122	-0.00695	6.66667	0.00708	0.67878	6.66667	-0.00249	0.10027	6.66667	-0.00823	-1.46846	6.66667	-0.00206	-0.17819
6.69444	0.000608	-0.0323	6.69444	0.00229	0.65939	6.69444	-0.00412	0.08204	6.69444	-0.00947	-1.50156	6.69444	-0.00195	-0.16535
6.72222	0.000413	0.00114	6.72222	0.00467	0.66297	6.72222	-0.00478	0.0855	6.72222	-0.00739	-1.39643	6.72222	0.00117	-0.17076
6.75	0.00111	0.000436	6.75	0.00246	0.6638	6.75	-0.00233	0.08157	6.75	-0.01089	-1.4234	6.75	-0.00109	-0.14834
6.77778	0.000443	-0.00349	6.77778	0.00256	0.64688	6.77778	-0.00273	0.06272	6.77778	-0.01288	-1.44742	6.77778	0.00151	-0.1525
6.80556	0.000184	-0.00131	6.80556	-0.000161	0.68224	6.80556	-0.00204	0.07058	6.80556	-0.0087	-1.38276	6.80556	0.00277	-0.1348
6.83333	0.00121	-0.02091	6.83333	0.00273	0.6744	6.83333	-0.00411	0.05837	6.83333	-0.00773	-1.36448	6.83333	0.00265	-0.12374
6.86111	0.000302	0.00567	6.86111	0.00355	0.6855	6.86111	-0.0014	0.05882	6.86111	-0.00567	-1.35405	6.86111	0.000683	-0.11807
6.88889	0.00141	-0.00168	6.88889	0.00288	0.67527	6.88889	-0.00209	0.07275	6.88889	-0.00905	-1.32592	6.88889	0.000666	-0.11414
6.91667	0.00119	-0.03077	6.91667	0.00307	0.67218	6.91667	-0.00408	0.06448	6.91667	-0.00522	-1.34445	6.91667	-0.000174	-0.11642
6.94444	0.00138	-0.00522	6.94444	0.00212	0.66523	6.94444	-0.00287	0.0488	6.94444	-0.00332	-1.30653	6.94444	-0.00157	-0.09074
6.97222	0.00104	-0.00523	6.97222	0.00239	0.64897	6.97222	-0.00119	0.05925	6.97222	-0.00513	-1.2734	6.97222	0.00597	-0.10245
7	9.4e-05	-0.000434	7	0.00201	0.65428	7	-0.00127	0.05331	7	-0.00639	-1.29591	7	-0.0019	-0.10601
7.02778	0.000631	-6e-06	7.02778	0.000271	0.64899	7.02778	-0.00484	0.05581	7.02778	-0.00918	-1.30428	7.02778	-0.00137	-0.0911
7.05556	3.1e-05	-0.00348	7.05556	0.00136	0.66744	7.05556	-0.0011	0.04227	7.05556	-0.00614	-1.24468	7.05556	0.00297	-0.09124
7.08333	0.0012	0.00131	7.08333	-0.00147	0.6562	7.08333	-0.00198	0.04531	7.08333	-0.0076	-1.26079	7.08333	-0.00117	-0.08541
7.11111	0.00118	1e-06	7.11111	-0.000572	0.64127	7.11111	-0.00336	0.04794	7.11111	-0.00423	-1.17569	7.11111	0.00487	-0.06578
7.13889	0.000584	0.000435	7.13889	-0.00144	0.62779	7.13889	-0.00162	0.05214	7.13889	-0.00566	-1.01279	7.13889	0.00478	-0.06143
7.16667	0.00129	-0.00218	7.16667	4.2e-05	0.65582	7.16667	-0.00333	0.00783	7.16667	-0.00358	-0.84981	7.16667	0.00028	-0.06796
7.19444	0.000241	0.000437	7.19444	0.000925	0.66571	7.19444	-0.00145	0.05635	7.19444	-0.00306	-0.715	7.19444	0.00284	0.07126
7.22222	0.000756	-0.000439	7.22222	-0.00142	0.65717	7.22222	-0.00223	0.00964	7.22222	-0.00268	-0.6069	7.22222	0.00682	1.49303
7.25	0.00106	-0.02174	7.25	0.0027	0.67788	7.25	-0.00138	0.04723	7.25	-0.000246	-0.52608	7.25	0.01994	2.79715
7.27778	0.00151	-0.000526	7.27778	-0.000432	0.66351	7.27778	-0.000782	0.02398	7.27778	-0.0022	-0.4631	7.27778	0.02593	3.64958
7.30556	0.00139	0.00789	7.30556	-0.00187	0.67048	7.30556	-0.00168	0.04116	7.30556	0.00183	-0.39927	7.30556	0.02749	4.26274
7.33333	-3.2e-05	0.07622	7.33333	0.00394	0.69066	7.33333	0.000213	0.02702	7.33333	0.00334	-0.34811	7.33333	0.03333	4.63222
7.36111	0.000894	0.09017	7.36111	0.00266	0.66915	7.36111	-0.000131	0.03984	7.36111	-0.0021	-0.34696	7.36111	0.0315	4.93956
7.38889	0.000685	0.10479	7.38889	-0.00133	0.62895	7.38889	-0.00115	0.00392	7.38889	-0.000136	-0.31802	7.38889	0.03253	5.16648
7.41667	0.00092	0.12765	7.41667	0.00137	0.67093	7.41667	-0.000613	0.04645	7.41667	0.00121	-0.28929	7.41667	0.03464	5.15732
7.44444	0.00195	0.1571	7.44444	0.00309	0.68223	7.44444	-0.00274	0.01388	7.44444	0.00411	-0.25901	7.44444	0.03841	5.30927
7.47222	0.000666	0.1808	7.47222	0.00139	0.69574	7.47222	-0.00275	0.04169	7.47222	0.00379	-0.24474	7.47222	0.03626	5.17247
7.5	0.0012	0.19375	7.5	0.00332	0.7027	7.5	-0.00442	0.02168	7.5	-0.000732	-0.23438	7.5	0.03289	5.00929
7.52778	6.3e-05	0.21032	7.52778	0.000681	0.69617	7.52778	-0.00418	0.02432	7.52778	0.00126	-0.22661	7.52778	0.03203	4.96161
7.55556	0.0015	0.22688	7.55556	0.000677	0.70791	7.55556	-0.00339	0.0334	7.55556	0.000563	-0.19952	7.55556	0.03608	4.36556
7.58333	0.000484	0.23337	7.58333	0.00253	0.71775	7.58333	-0.00403	0.00348	7.58333	-0.00045	-0.19168	7.58333	0.02984	3.76362
7.61111	0.000928	0.23388	7.61111	0.00291	0.68049	7.61111	-0.00186	0.000437	7.61111	0.0035	-0.20478	7.61111	0.01822	3.18038
7.63889	0.000729	0.23787	7.63889	0.00194	0.68746	7.63889	-0.00299	0.01741	7.63889	0.00281	-0.17382	7.63889	0.01792	2.69907
7.66667	0.00143	0.25313	7.66667	-0.000369	0.69094	7.66667	-0.00252	0.04204	7.66667	0.00435	-0.16947	7.66667	0.01332	2.2023
7.69444	0.000371	0.25353	7.69444	0.000496	0.67962	7.69444	-0.000767	0.00261	7.69444	0.00405	-0.14723	7.69444	0.00746	1.98909
7.72222	0.00149	0.25836	7.72222	-0.0013	0.69051	7.72222	-0.00468	0.01419	7.72222	0.00312	-0.15276	7.72222	0.00596	1.77613
7.75	0.00108	0.26813	7.75	0.00304	0.69747	7.75	-0.00144	0.02436	7.75	-0.00135	-0.14979	7.75	0.00544	1.54499
7.77778	0.00205	0.26313	7.77778	-0.000374	0.69312	7.77778	-0.00288	0.01523	7.77778	0.00383	-0.14027	7.77778	0.00624	1.39463
7.80556	--	--	7.80556			7.80556			7.80556			7.80556
7.83333	--	--	7.83333			7.83333			7.83333			7.83333
7.86111	--	--	7.86111			7.86111			7.86111			7.86111
7.88889	--	--	7.88889			7.88889			7.88889			7.88889
7.91667	--	--	7.91667			7.91667			7.91667			7.91667
7.94444	--	--	7.94444			7.94444			7.94444			7.94444
7.97222	--	--	7.97222			7.97222			7.97222			7.97222
8	--	--	8			8			8			8
8.02778	--	--	8.02778			8.02778			8.02778			8.02778
8.05556	--	--	8.05556			8.05556			8.05556			8.05556
8.08333	--	--	8.08333			8.08333			8.08333			8.08333
8.11111	--	--	8.11111			8.11111			8.11111			8.11111
8.13889	--	--	8.13889			8.13889			8.13889			8.13889
8.16667	--	--	8.16667			8.16667			8.16667			8.16667
8.19444	--	--	8.19444			8.19444			8.19444			8.19444
8.22222	--	--	8.22222			8.22222			8.22222			8.22222
8.25	--	--	8.25			8.25			8.25			8.25
8.27778	--	--	8.27778			8.27778			8.27778			8.27778
8.30556	--	--	8.30556			8.30556			8.30556			8.30556
8.33333	--	--	8.33333			8.33333			8.33333			8.33333
8.36111	--	--	8.36111			8.36111			8.36111			8.36111
8.38889	--	--	8.38889			8.38889			8.38889			8.38889
8.41667	--	--	8.41667			8.41667			8.41667			8.41667
8.44444	--	--	8.44444			8.44444			8.44444			8.44444
8.47222	--	--	8.47222			8.47222			8.47222			8.47222
8.5	--	--	8.5			8.5			8.5			8.5
8.52778	--	--	8.52778			8.52778			8.52778			8.52778
8.55556	--	--	8.55556			8.55556			8.55556			8.55556
8.58333	--	--	8.58333			8.58333			8.58333			8.58333
8.61111	--	--	8.61111			8.61111			8.61111			8.61111
8.63889	--	--	8.63889			8.63889			8.63889			8.63889
8.66667	--	--	8.66667			8.66667			8.66667			8.66667
8.69444	--	--	8.69444			8.69444			8.69444			8.69444
8.72222	--	--	8.72222			8.72222			8.72222			8.72222
8.75	--	--	8.75			8.75			8.75			8.75
8.77778	--	--	8.77778			8.77778			8.77778			8.77778
8.80556	--	--	8.80556			8.80556			8.80556			8.80556
8.83333	--	--	8.83333			8.83333			8.83333			8.83333
8.86111	--	--	8.86111			8.86111			8.86111			8.86111
8.88889	--	--	8.88889			8.88889			8.88889			8.88889
8.91667	--	--	8.91667			8.91667			8.91667			8.91667
8.94444	--	--	8.94444			8.94444			8.94444			8.94444
8.97222	--	--	8.97222			8.97222			8.97222			8.97222
9	--	--	9			9			9			9
9.02778	--	--	9.02778			9.02778			9.02778			9.02778
9.05556	--	--	9.05556			9.05556			9.05556			9.05556
9.08333	--	--	9.08333			9.08333			9.08333			9.08333
9.11111	--	--	9.11111			9.11111			9.11111			9.11111
9.13889	--	--	9.13889			9.13889			9.13889			9.13889
9.16667	--	--	9.16667			9.16667			9.16667			9.16667
9.19444	--	--	9.19444			9.19444			9.19444			9.19444
9.22222	--	--	9.22222			9.22222			9.22222			9.22222
9.25	--	--	9.25			9.25			9.25			9.25
9.27778	--	--	9.27778			9.27778			9.27778			9.27778
9.30556	--	--	9.30556			9.30556			9.30556			9.30556
9.33333	--	--	9.33333			9.33333			9.33333			9.33333
9.36111	--	--	9.36111			9.36111			9.36111			9.36111
9.38889	--	--	9.38889			9.38889			9.38889			9.38889
9.41667	--	--	9.41667			9.41667			9.41667			9.41667
9.44444	--	--	9.44444			9.44444			9.44444			9.44444
9.47222	--	--	9.47222			9.47222			9.47222			9.47222
9.5	--	--	9.5			9.5			9.5			9.5
9.52778	--	--	9.52778			9.52778			9.52778			9.52778
9.55556	--	--	9.55556			9.55556			9.55556			9.55556
9.58333	--	--	9.58333			9.58333			9.58333			9.58333
9.61111	--	--	9.61111			9.61111			9.61111			9.61111
9.63889	--	--	9.63889			9.63889			9.63889			9.63889
9.66667	--	--	9.66667			9.66667			9.66667			9.66667
9.69444	--	--	9.69444			9.69444			9.69444			9.69444
9.72222	--	--	9.72222			9.72222			9.72222			9.72222
9.75	--	--	9.75			9.75			9.75			9.75
9.77778	--	--	9.77778			9.77778			9.77778			9.77778
9.80556	--	--	9.80556			9.80556			9.80556			9.80556
9.83333	--	--	9.83333			9.83333			9.83333			9.83333
9.86111	--	--	9.86111			9.86111			9.86111			9.86111
9.88889	--	--	9.88889			9.88889			9.88889			9.88889
9.91667	--	--	9.91667			9.91667			9.91667			9.91667
9.94444	--	--	9.94444			9.94444			9.94444			9.94444
9.97222	--	--	9.97222			9.97222			9.97222			9.97222
10	--	--	10			10			10			10
10.0278	--	--	10.0278			10.0278			10.0278			10.0278
10.0556	--	--	10.0556			10.0556			10.0556			10.0556
10.0833	--	--	10.0833			10.0833			10.0833			10.0833
10.1111	--	--	10.1111			10.1111			10.1111			10.1111
10.1389	--	--	10.1389			10.1389			10.1389			10.1389
10.1667	--	--	10.1667			10.1667			10.1667			10.1667
10.1944	--	--	10.1944			10.1944			10.1944			10.1944
10.2222	--	--	10.2222			10.2222			10.2222			10.2222
10.25	--	--	10.25			10.25			10.25			10.25
10.2778	--	--	10.2778			10.2778			10.2778			10.2778
10.3056	--	--	10.3056			10.3056			10.3056			10.3056
10.3333	--	--	10.3333			10.3333			10.3333			10.3333
10.3611	--	--	10.3611			10.3611			10.3611			10.3611
10.3889	--	--	10.3889			10.3889			10.3889			10.3889
10.4167	--	--	10.4167			10.4167			10.4167			10.4167
10.4444	--	--	10.4444			10.4444			10.4444			10.4444
10.4722	--	--	10.4722			10.4722			10.4722			10.4722
10.5	--	--	10.5			10.5			10.5			10.5
10.5278	--	--	10.5278			10.5278			10.5278			10.5278
10.5556	--	--	10.5556			10.5556			10.5556			10.5556
10.5833	--	--	10.5833			10.5833			10.5833			10.5833
10.6111	--	--	10.6111			10.6111			10.6111			10.6111
10.6389	--	--	10.6389			10.6389			10.6389			10.6389

## Sheet: Fig5b-1
0.02778	-0.00103	-0.000125	20.1263
0.05556	-0.0012	0.05925	20.1262
0.08333	0.000344	0.1237	20.1854
0.11111	-0.00141	0.13732	20.3091
0.13889	8.9e-05	0.46969	20.4464
0.16667	0.00221	0.74108	20.9161
0.19444	0.00111	0.79507	21.6572
0.22222	0.00354	0.83578	22.4523
0.25	0.00203	0.85999	23.2881
0.27778	0.00158	0.92513	24.1481
0.30556	0.00303	0.95144	25.0732
0.33333	0.00176	0.99077	26.0246
0.36111	0.00252	1.04165	27.0154
0.38889	0.000535	1.07693	28.0571
0.41667	0.00315	1.10229	29.134
0.44444	0.00348	1.11614	30.2363
0.47222	0.00128	1.13109	31.3524
0.5	0.00256	1.21415	32.4835
0.52778	0.00144	1.24567	33.6977
0.55556	0.00226	1.23551	34.9433
0.58333	0.00419	1.25381	36.1788
0.61111	0.00303	1.26818	37.4327
0.63889	0.000815	1.24161	38.7008
0.66667	0.0037	1.27995	39.9424
0.69444	0.00344	1.26011	41.2224
0.72222	0.00385	1.31041	42.4825
0.75	0.00378	1.14885	43.7929
0.77778	0.00679	1.05288	44.9417
0.80556	0.00603	0.90294	45.9946
0.83333	0.00556	0.81661	46.8976
0.86111	0.00675	0.72588	47.7142
0.88889	0.00567	0.64463	48.4401
0.91667	0.00321	0.53119	49.0847
0.94444	0.00167	0.54255	49.6159
0.97222	0.000167	0.48363	50.1584
1	0.00171	0.46221	50.6421
1.02778	0.000688	0.44132	51.1043
1.05556	-0.000424	0.39316	51.5456
1.08333	-0.00066	0.36421	51.9388
1.11111	-0.00292	0.34912	52.303
1.13889	-0.0033	0.31846	52.6521
1.16667	-0.000331	0.32194	52.9705
1.19444	-3.8e-05	0.31193	53.2925
1.22222	-0.00264	0.28153	53.6044
1.25	-0.00103	0.25848	53.886
1.27778	0.000149	0.26104	54.1444
1.30556	-0.003	0.27227	54.4055
1.33333	-0.00424	0.23834	54.6777
1.36111	0.000911	0.23238	54.9161
1.38889	-0.000844	0.22742	55.1484
1.41667	-0.00242	0.21194	55.3759
1.44444	-0.000114	0.19516	55.5878
1.47222	-0.00466	0.19212	55.783
1.5	-0.00288	0.18995	55.9751
1.52778	-0.00128	0.18428	56.1651
1.55556	-0.00048	0.16066	56.3493
1.58333	-0.00219	0.16499	56.51
1.61111	-0.000605	0.13669	56.675
1.63889	-0.00132	0.13113	56.8117
1.66667	-0.00304	0.1381	56.9428
1.69444	-0.00205	0.13461	57.0809
1.72222	-0.00234	0.13351	57.2155
1.75	0.000978	0.11114	57.349
1.77778	0.000239	0.11434	57.4601
1.80556	-0.0017	0.11502	57.5745
1.83333	0.000577	0.11197	57.6895
1.86111	-0.00144	0.10849	57.8015
1.88889	0.00095	0.10818	57.91
1.91667	-0.00114	0.09462	58.0181
1.94444	0.00209	0.08247	58.1128
1.97222	-0.00303	0.08668	58.1952
2	-0.000694	0.0623	58.2819
2.02778	0.00137	0.07536	58.3442
2.05556	-0.000442	0.06839	58.4196
2.08333	-0.00257	0.07773	58.488
2.11111	-0.000652	0.06843	58.5657
2.13889	-0.000531	0.06971	58.6341
2.16667	0.00118	0.06664	58.7038
2.19444	0.000883	0.05054	58.7705
2.22222	-0.000155	0.06362	58.821
2.25	-0.0014	0.06143	58.8847
2.27778	-0.000997	0.05393	58.9461
2.30556	0.00106	0.05823	59
2.33333	0.000141	0.03269	59.0582
2.36111	-0.00218	0.04837	59.0909
2.38889	-0.00103	0.04821	59.1393
2.41667	0.000947	0.04524	59.1875
2.44444	-0.00176	0.02248	59.2327
2.47222	0.000616	0.04527	59.2552
2.5	-0.000134	0.01745	59.3005
2.52778	-0.000934	0.04922	59.318
2.55556	-0.00229	0.00827	59.3672
2.58333	-0.0016	0.02052	59.3754
2.61111	0.00313	0.04198	59.3959
2.63889	0.000174	0.04318	59.4379
2.66667	-0.000569	0.02276	59.4811
2.69444	0.000281	0.05283	59.5039
2.72222	-0.00242	-0.1996	59.5567
2.75	-0.00404	-0.4837	59.3571
2.77778	0.00049	-0.27937	58.8734
2.80556	-0.000118	-0.41142	58.594
2.83333	-0.00402	-0.5192	58.1826
2.86111	-0.00407	-0.60638	57.6634
2.88889	-0.00364	-0.7014	57.057
2.91667	-0.00436	-0.78831	56.3556
2.94444	-0.00317	-0.88136	55.5673
2.97222	-0.00444	-0.9735	54.686
3	-0.00369	-1.02245	53.7125
3.02778	-0.00415	-1.06225	52.69
3.05556	-0.00445	-1.14227	51.6278
3.08333	-0.00615	-1.1696	50.4855
3.11111	-0.00661	-1.1746	49.3159
3.13889	-0.00481	-1.21679	48.1413
3.16667	-0.00411	-1.18702	46.9245
3.19444	-0.00296	-1.24982	45.7375
3.22222	-0.00489	-1.26055	44.4877
3.25	-0.00353	-1.26689	43.2271
3.27778	-0.00668	-1.33177	41.9602
3.30556	-0.00494	-1.34311	40.6285
3.33333	-0.00484	-1.36645	39.2854
3.36111	-0.00407	-1.36358	37.9189
3.38889	-0.00605	-1.32889	36.5553
3.41667	-0.00401	-1.29926	35.2264
3.44444	-0.00368	-0.94925	33.9272
3.47222	-0.00442	-0.95263	32.9779
3.5	-0.00499	-0.81608	32.0253
3.52778	-0.00276	-0.72274	31.2092
3.55556	-0.00477	-0.62085	30.4865
3.58333	-0.00513	-0.51792	29.8656
3.61111	-0.00113	-0.44043	29.3477
3.63889	-0.00149	-0.36923	28.9073
3.66667	-0.00531	-0.3768	28.538
3.69444	-0.00442	-0.40348	28.1612
3.72222	-0.00205	-0.41475	27.7578
3.75	-0.00255	-0.38659	27.343
3.77778	-0.00383	-0.37064	26.9564
3.80556	-0.000996	-0.32368	26.5858
3.83333	-0.00295	-0.22545	26.2621
3.86111	-0.00258	-0.19691	26.0367
3.88889	-0.000761	-0.20822	25.8397
3.91667	-0.00458	-0.2343	25.6315
3.94444	-0.00245	-0.25467	25.3972
3.97222	-0.0034	-0.25138	25.1425
4	0.000239	-0.2359	24.8912
4.02778	-0.00315	-0.25136	24.6553
4.05556	-0.000372	-0.21263	24.4039
4.08333	-0.00147	-0.21473	24.1913
4.11111	0.0012	-0.18515	23.9765
4.13889	-0.00277	-0.16373	23.7914
4.16667	-0.00224	-0.14497	23.6277
4.19444	-0.00067	-0.1515	23.4827
4.22222	-0.00191	-0.13723	23.3312
4.25	-0.00217	-0.15174	23.194
4.27778	-0.00147	-0.14819	23.0422
4.30556	-0.00126	-0.12634	22.894
4.33333	-0.00202	-0.12242	22.7677
4.36111	-0.00203	-0.1198	22.6453
4.38889	-0.00239	-0.11195	22.5255
4.41667	-0.00225	-0.10044	22.4135
4.44444	0.000462	-0.09885	22.3131
4.47222	0.000379	-0.09177	22.2142
4.5	-0.000866	-0.09707	22.1225
4.52778	-0.00192	-0.10356	22.0254
4.55556	-0.00165	-0.08224	21.9218
4.58333	0.000607	-0.07187	21.8396
4.61111	-0.00211	-0.02514	21.7677
4.63889	0.000738	-0.05263	21.7426
4.66667	0.000206	-0.06056	21.69
4.69444	-0.00094	-0.08188	21.6294
4.72222	-0.00175	-0.09738	21.5475
4.75	-0.000916	-0.08496	21.4501
4.77778	-0.000778	-0.05137	21.3652
4.80556	0.00102	-0.0092	21.3138
4.83333	0.00454	-0.05155	21.3046
4.86111	0.000606	-0.03275	21.2531
4.88889	-0.00171	-0.05316	21.2203
4.91667	-0.00201	-0.04345	21.1671
4.94444	-8.4e-05	-0.04816	21.1237
4.97222	0.000761	-0.06392	21.0755
5	-0.00129	-0.06105	21.0116
5.02778	-0.00162	-0.02979	20.9506
5.05556	0.000268	-0.04577	20.9208
5.08333	0.00104	-0.04506	20.875
5.11111	0.00059	-0.01787	20.8299
5.13889	0.000435	-0.05164	20.8121
5.16667	0.00091	-0.01086	20.7604
5.19444	0.000116	-0.0209	20.7496
5.22222	-0.00189	-0.03622	20.7287
5.25	5.2e-05	-0.02746	20.6924
5.27778	-0.00231	-0.03954	20.665
5.30556	2.9e-05	-0.000434	20.6254
5.33333	--	--	--
5.36111	--	--	--
5.38889	--	--	--
5.41667	--	--	--
5.44444	--	--	--
5.47222	--	--	--
5.5	--	--	--
5.52778	--	--	--
5.55556	--	--	--
5.58333	--	--	--
5.61111	--	--	--
5.63889	--	--	--
5.66667	--	--	--
5.69444	--	--	--
5.72222	--	--	--
5.75	--	--	--
5.77778	--	--	--
5.80556	--	--	--
5.83333	--	--	--
5.86111	--	--	--
5.88889	--	--	--
5.91667	--	--	--
5.94444	--	--	--
5.97222	--	--	--
6	--	--	--
6.02778	--	--	--
6.05556	--	--	--
6.08333	--	--	--
6.11111	--	--	--
6.13889	--	--	--
6.16667	--	--	--
6.19444	--	--	--
6.22222	--	--	--
6.25	--	--	--
6.27778	--	--	--
6.30556	--	--	--
6.33333	--	--	--
6.36111	--	--	--
6.38889	--	--	--
6.41667	--	--	--
6.44444	--	--	--
6.47222	--	--	--
6.5	--	--	--
6.52778	--	--	--
6.55556	--	--	--
6.58333	--	--	--
6.61111	--	--	--
6.63889	--	--	--
6.66667	--	--	--
6.69444	--	--	--
6.72222	--	--	--
6.75	--	--	--
6.77778	--	--	--
6.80556	--	--	--
6.83333	--	--	--
6.86111	--	--	--
6.88889	--	--	--
6.91667	--	--	--
6.94444	--	--	--
6.97222	--	--	--
7	--	--	--
7.02778	--	--	--
7.05556	--	--	--
7.08333	--	--	--
7.11111	--	--	--
7.13889	--	--	--
7.16667	--	--	--
7.19444	--	--	--
7.22222	--	--	--
7.25	--	--	--
7.27778	--	--	--
7.30556	--	--	--
7.33333	--	--	--
7.36111	--	--	--
7.38889	--	--	--
7.41667	--	--	--
7.44444	--	--	--
7.47222	--	--	--
7.5	--	--	--
7.52778	--	--	--
7.55556	--	--	--
7.58333	--	--	--
7.61111	--	--	--
7.63889	--	--	--
7.66667	--	--	--
7.69444	--	--	--
7.72222	--	--	--
7.75	--	--	--
7.77778	--	--	--
7.80556	--	--	--
7.83333	--	--	--
7.86111	--	--	--
7.88889	--	--	--
7.91667	--	--	--
7.94444	--	--	--
7.97222	--	--	--
8	--	--	--
8.02778	--	--	--
8.05556	--	--	--
8.08333	--	--	--
8.11111	--	--	--
8.13889	--	--	--
8.16667	--	--	--
8.19444	--	--	--
8.22222	--	--	--
8.25	--	--	--
8.27778	--	--	--
8.30556	--	--	--
8.33333	--	--	--
8.36111	--	--	--
8.38889	--	--	--
8.41667	--	--	--
8.44444	--	--	--
8.47222	--	--	--
8.5	--	--	--
8.52778	--	--	--
8.55556	--	--	--
8.58333	--	--	--
8.61111	--	--	--
8.63889	--	--	--
8.66667	--	--	--
8.69444	--	--	--
8.72222	--	--	--
8.75	--	--	--
8.77778	--	--	--
8.80556	--	--	--
8.83333	--	--	--
8.86111	--	--	--
8.88889	--	--	--
8.91667	--	--	--
8.94444	--	--	--
8.97222	--	--	--
9	--	--	--
9.02778	--	--	--
9.05556	--	--	--
9.08333	--	--	--
9.11111	--	--	--
9.13889	--	--	--
9.16667	--	--	--
9.19444	--	--	--
9.22222	--	--	--
9.25	--	--	--
9.27778	--	--	--
9.30556	--	--	--
9.33333	--	--	--
9.36111	--	--	--
9.38889	--	--	--
9.41667	--	--	--
9.44444	--	--	--
9.47222	--	--	--
9.5	--	--	--
9.52778	--	--	--
9.55556	--	--	--
9.58333	--	--	--
9.61111	--	--	--
9.63889	--	--	--
9.66667	--	--	--
9.69444	--	--	--
9.72222	--	--	--
9.75	--	--	--
9.77778	--	--	--
9.80556	--	--	--
9.83333	--	--	--
9.86111	--	--	--
9.88889	--	--	--
9.91667	--	--	--
9.94444	--	--	--
9.97222	--	--	--
10	--	--	--
10.0278	--	--	--
10.0556	--	--	--
10.0833	--	--	--
10.1111	--	--	--
10.1389	--	--	--
10.1667	--	--	--
10.1944	--	--	--
10.2222	--	--	--
10.25	--	--	--
10.2778	--	--	--
10.3056	--	--	--
10.3333	--	--	--
10.3611	--	--	--
10.3889	--	--	--
10.4167	--	--	--
10.4444	--	--	--
10.4722	--	--	--
10.5	--	--	--
10.5278	--	--	--
10.5556	--	--	--
10.5833	--	--	--
10.6111	--	--	--
10.6389	--	--	--

## Sheet: Fig5b-2
0.02778	0.000586	0.03533	0.02778	-0.000328	0.00313	0.02778	-0.00103	-0.000125	0.02778	0.0012	-0.00871	0.02778	-0.00186	-0.07262
0.05556	0.00024	-0.00839	0.05556	-0.000566	0.09337	0.05556	-0.0012	0.05925	0.05556	0.00296	-0.04479	0.05556	-0.00314	-0.03284
0.08333	-0.0013	0.05076	0.08333	0.000981	0.23814	0.08333	0.000344	0.1237	0.08333	0.00134	-0.02816	0.08333	0.0011	1.02804
0.11111	0.000141	0.18327	0.11111	0.000837	0.27671	0.11111	-0.00141	0.13732	0.11111	0.00322	0.24802	0.11111	0.01091	2.72381
0.13889	-0.00117	0.16905	0.13889	-0.00103	0.3288	0.13889	8.9e-05	0.46969	0.13889	0.0023	0.68993	0.13889	0.00593	3.97762
0.16667	-0.000743	0.16773	0.16667	0.00109	0.36073	0.16667	0.00221	0.74108	0.16667	0.00276	0.9911	0.16667	0.00765	4.88972
0.19444	4e-05	0.17339	0.19444	-3.3e-05	0.38772	0.19444	0.00111	0.79507	0.19444	-0.00103	1.25646	0.19444	0.00923	5.06639
0.22222	0.000856	0.17344	0.22222	0.000788	0.44305	0.22222	0.00354	0.83578	0.22222	0.00252	1.4277	0.22222	0.0261	4.75654
0.25	0.00202	0.16486	0.25	-6e-06	0.45809	0.25	0.00203	0.85999	0.25	0.00301	1.60136	0.25	0.03027	4.20021
0.27778	0.000867	0.17774	0.27778	0.00151	0.46792	0.27778	0.00158	0.92513	0.27778	0.00535	1.71807	0.27778	0.02459	3.18103
0.30556	0.00128	0.1943	0.30556	0.00132	0.47705	0.30556	0.00303	0.95144	0.30556	0.01092	1.82703	0.30556	0.02374	2.65371
0.33333	0.000653	0.19911	0.33333	0.000349	0.49577	0.33333	0.00176	0.99077	0.33333	0.00991	1.8991	0.33333	0.02008	2.32142
0.36111	0.00103	0.20408	0.36111	0.000922	0.5232	0.36111	0.00252	1.04165	0.36111	0.00854	1.99638	0.36111	0.02108	2.08501
0.38889	0.000671	0.19735	0.38889	-0.000567	0.52812	0.38889	0.000535	1.07693	0.38889	0.00886	1.87665	0.38889	0.01615	2.00105
0.41667	0.0015	0.1956	0.41667	0.0025	0.55372	0.41667	0.00315	1.10229	0.41667	0.01264	1.71993	0.41667	0.01724	1.82715
0.44444	-0.000208	0.21041	0.44444	0.000786	0.55532	0.44444	0.00348	1.11614	0.44444	0.01195	1.83704	0.44444	0.01776	1.56664
0.47222	0.000287	0.21029	0.47222	0.000942	0.56184	0.47222	0.00128	1.13109	0.47222	0.00736	1.33987	0.47222	0.0182	1.14951
0.5	0.00181	0.23918	0.5	0.00066	0.58536	0.5	0.00256	1.21415	0.5	0.00608	1.36441	0.5	0.00675	0.85427
0.52778	0.000872	0.24266	0.52778	0.00197	0.60246	0.52778	0.00144	1.24567	0.52778	0.00484	1.40107	0.52778	0.0218	0.83964
0.55556	-5.6e-05	0.24093	0.55556	0.000602	0.60121	0.55556	0.00226	1.23551	0.55556	0.0046	1.14336	0.55556	0.00818	1.06113
0.58333	0.000396	0.24528	0.58333	0.00016	0.64258	0.58333	0.00419	1.25381	0.58333	0.00756	0.88167	0.58333	0.00985	1.21399
0.61111	0.00141	0.25659	0.61111	0.00123	0.64258	0.61111	0.00303	1.26818	0.61111	0.00678	0.73843	0.61111	0.01345	1.0589
0.63889	0.000323	0.24096	0.63889	0.000438	0.65001	0.63889	0.000815	1.24161	0.63889	0.0047	0.68525	0.63889	0.01672	0.74677
0.66667	0.00149	0.24374	0.66667	0.00211	0.65322	0.66667	0.0037	1.27995	0.66667	0.00643	0.72361	0.66667	0.00653	0.57407
0.69444	0.000635	0.24484	0.69444	0.00173	0.65353	0.69444	0.00344	1.26011	0.69444	0.00696	0.73762	0.69444	0.01051	0.54083
0.72222	0.00204	0.24684	0.72222	3.5e-05	0.64013	0.72222	0.00385	1.31041	0.72222	0.00287	0.65678	0.72222	0.00566	0.8128
0.75	0.000802	0.28008	0.75	0.00157	0.66706	0.75	0.00378	1.14885	0.75	0.00748	0.55206	0.75	0.00265	0.84877
0.77778	0.00199	0.2688	0.77778	0.00109	0.68746	0.77778	0.00679	1.05288	0.77778	0.00485	0.43434	0.77778	-0.00101	0.77146
0.80556	-0.00109	0.27672	0.80556	0.00227	0.6892	0.80556	0.00603	0.90294	0.80556	0.00306	0.42171	0.80556	0.00626	0.61928
0.83333	0.00174	0.27153	0.83333	0.00067	0.69964	0.83333	0.00556	0.81661	0.83333	0.00449	0.43609	0.83333	0.00417	0.46716
0.86111	0.00175	0.27371	0.86111	0.00122	0.70489	0.86111	0.00675	0.72588	0.86111	0.00324	0.415	0.86111	0.0056	0.46031
0.88889	-0.000868	0.27455	0.88889	0.00285	0.73354	0.88889	0.00567	0.64463	0.88889	0.000503	0.38554	0.88889	0.00454	0.43978
0.91667	6.7e-05	0.29333	0.91667	8.9e-05	0.74809	0.91667	0.00321	0.53119	0.91667	0.00194	0.369	0.91667	0.00576	0.45945
0.94444	0.000257	0.28237	0.94444	0.00211	0.73012	0.94444	0.00167	0.54255	0.94444	0.00204	0.36159	0.94444	-0.00188	0.51241
0.97222	-0.00019	0.27662	0.97222	0.00133	0.71971	0.97222	0.000167	0.48363	0.97222	0.00146	0.35306	0.97222	0.00348	0.50174
1	0.000622	0.26182	1	0.00226	0.71315	1	0.00171	0.46221	1	-0.00255	0.30235	1	-0.00268	0.47935
1.02778	-0.000578	0.28753	1.02778	0.00162	0.71968	1.02778	0.000688	0.44132	1.02778	-0.000267	0.29684	1.02778	0.0048	0.4095
1.05556	0.000541	0.29667	1.05556	0.00297	0.73592	1.05556	-0.000424	0.39316	1.05556	0.000323	0.26704	1.05556	-0.004	0.42113
1.08333	0.000278	0.30606	1.08333	0.0015	0.75354	1.08333	-0.00066	0.36421	1.08333	-8.9e-05	0.24875	1.08333	0.00278	0.4284
1.11111	-0.00114	0.28972	1.11111	0.00259	0.73589	1.11111	-0.00292	0.34912	1.11111	0.00103	0.24223	1.11111	0.00337	0.33549
1.13889	0.00142	0.28334	1.13889	0.00168	0.76238	1.13889	-0.0033	0.31846	1.13889	-0.00166	0.24179	1.13889	0.00301	0.2661
1.16667	0.000731	0.30632	1.16667	0.00214	0.74378	1.16667	-0.000331	0.32194	1.16667	0.00247	0.2444	1.16667	-0.0039	0.23162
1.19444	-0.000429	0.29886	1.19444	0.0019	0.75256	1.19444	-3.8e-05	0.31193	1.19444	-0.0031	0.22138	1.19444	-0.00722	0.25019
1.22222	0.000532	0.325	1.22222	0.00384	0.73333	1.22222	-0.00264	0.28153	1.22222	0.0006	0.2517	1.22222	-0.00281	0.27292
1.25	0.00167	0.30539	1.25	0.00188	0.74976	1.25	-0.00103	0.25848	1.25	-0.00141	0.24274	1.25	0.0027	0.30951
1.27778	0.00137	0.30235	1.27778	0.0017	0.73016	1.27778	0.000149	0.26104	1.27778	0.000591	0.20997	1.27778	0.00312	0.26843
1.30556	-0.000574	0.30626	1.30556	0.000121	0.76195	1.30556	-0.003	0.27227	1.30556	-0.000607	0.19126	1.30556	0.00138	0.27351
1.33333	3.3e-05	0.32761	1.33333	0.000859	0.74976	1.33333	-0.00424	0.23834	1.33333	0.00205	0.18383	1.33333	0.00264	0.24815
1.36111	0.000656	0.32194	1.36111	0.00192	0.72971	1.36111	0.000911	0.23238	1.36111	-0.00401	0.16688	1.36111	-0.00386	0.25048
1.38889	0.00131	0.29668	1.38889	0.00305	0.64236	1.38889	-0.000844	0.22742	1.38889	-0.00164	0.16164	1.38889	-0.00159	0.25509
1.41667	-0.00115	0.31496	1.41667	0.00207	0.59898	1.41667	-0.00242	0.21194	1.41667	-0.000334	0.14894	1.41667	-0.0026	0.22086
1.44444	-0.000139	0.32892	1.44444	0.00148	0.54212	1.44444	-0.000114	0.19516	1.44444	-0.000943	0.14811	1.44444	-0.00159	0.17323
1.47222	-0.000196	0.32459	1.47222	0.0027	0.47654	1.47222	-0.00466	0.19212	1.47222	0.00104	0.13635	1.47222	0.00373	0.16403
1.5	-8.6e-05	0.31344	1.5	0.000495	0.41213	1.5	-0.00288	0.18995	1.5	-0.00258	0.14114	1.5	-0.01103	0.19461
1.52778	0.000176	0.31497	1.52778	0.00259	0.37185	1.52778	-0.00128	0.18428	1.52778	-0.000418	0.13779	1.52778	-0.00272	0.17136
1.55556	0.000174	0.3215	1.55556	0.00079	0.31106	1.55556	-0.00048	0.16066	1.55556	-0.00136	0.13035	1.55556	-0.00295	0.19969
1.58333	0.000996	0.33674	1.58333	0.00146	0.2961	1.58333	-0.00219	0.16499	1.58333	-0.000179	0.12574	1.58333	-0.00499	0.19816
1.61111	0.000297	0.31715	1.61111	-6e-05	0.29181	1.61111	-0.000605	0.13669	1.61111	-0.0017	0.1197	1.61111	0.00133	0.18993
1.63889	0.000406	0.32339	1.63889	-0.000418	0.30191	1.63889	-0.00132	0.13113	1.63889	0.000299	0.12031	1.63889	-0.000742	0.14511
1.66667	-3.2e-05	0.32378	1.66667	-0.00229	0.27799	1.66667	-0.00304	0.1381	1.66667	0.000646	0.11412	1.66667	0.00217	0.10674
1.69444	6.7e-05	0.32237	1.69444	-0.000239	0.26661	1.69444	-0.00205	0.13461	1.69444	-0.000124	0.11023	1.69444	-0.00204	0.06101
1.72222	3.2e-05	0.33544	1.72222	0.00111	0.26007	1.72222	-0.00234	0.13351	1.72222	0.00227	0.09759	1.72222	0.00499	0.0844
1.75	0.000527	0.32847	1.75	0.00138	0.24833	1.75	0.000978	0.11114	1.75	-0.00352	0.08384	1.75	0.00248	0.11658
1.77778	0.000332	0.31541	1.77778	0.000695	0.22916	1.77778	0.000239	0.11434	1.77778	-0.00146	0.09365	1.77778	0.00434	0.15116
1.80556	0.000531	0.33916	1.80556	5.1e-05	0.20016	1.80556	-0.0017	0.11502	1.80556	-0.00122	0.06839	1.80556	-0.00301	0.1738
1.83333	5e-06	0.3433	1.83333	-0.000537	0.19864	1.83333	0.000577	0.11197	1.83333	0.000376	0.07405	1.83333	-0.00111	0.17136
1.86111	-0.0011	0.3461	1.86111	0.000325	0.19867	1.86111	-0.00144	0.10849	1.86111	-0.00115	0.0623	1.86111	0.00767	0.15943
1.88889	0.000232	0.3424	1.88889	-0.000253	0.20223	1.88889	0.00095	0.10818	1.88889	0.000226	0.06186	1.88889	-0.000904	0.11761
1.91667	0.000767	0.31353	1.91667	-0.000233	0.19138	1.91667	-0.00114	0.09462	1.91667	-0.000688	0.0779	1.91667	0.000404	0.07482
1.94444	0.00177	0.32275	1.94444	0.0023	0.16195	1.94444	0.00209	0.08247	1.94444	-0.000578	0.07916	1.94444	-0.00278	0.04935
1.97222	0.00057	0.32238	1.97222	-0.00052	0.11849	1.97222	-0.00303	0.08668	1.97222	-0.00133	0.08146	1.97222	0.00328	0.01306
2	0.000932	0.3276	2	-0.00189	0.10181	2	-0.000694	0.0623	2	-0.00188	0.08537	2	0.000481	0.01016
2.02778	0.000108	0.33543	2.02778	-0.00061	0.09451	2.02778	0.00137	0.07536	2.02778	0.00564	0.06709	2.02778	-0.000937	0.06218
2.05556	0.00117	0.31976	2.05556	-0.000686	0.11363	2.05556	-0.000442	0.06839	2.05556	0.00221	0.05359	2.05556	-0.00918	0.10237
2.08333	0.00183	0.33018	2.08333	0.000635	0.11899	2.08333	-0.00257	0.07773	2.08333	1.8e-05	0.04575	2.08333	0.00146	0.05739
2.11111	0.00113	0.33179	2.11111	-0.000207	0.13678	2.11111	-0.000652	0.06843	2.11111	0.00263	0.0353	2.11111	0.00589	0.08402
2.13889	0.00117	0.32717	2.13889	0.000971	0.15815	2.13889	-0.000531	0.06971	2.13889	0.00335	0.04527	2.13889	0.0006	0.02963
2.16667	-0.000367	0.31758	2.16667	-0.000792	0.17358	2.16667	0.00118	0.06664	2.16667	-0.00174	0.01045	2.16667	-0.00178	0.11906
2.19444	-0.000167	0.32675	2.19444	0.000393	0.13155	2.19444	0.000883	0.05054	2.19444	-0.000525	0.01966	2.19444	-0.00148	-0.65409
2.22222	0.000581	0.32608	2.22222	-0.000543	0.13027	2.22222	-0.000155	0.06362	2.22222	0.000108	0.04415	2.22222	-0.01577	-1.67368
2.25	0.00082	0.34594	2.25	-0.00027	0.10013	2.25	-0.0014	0.06143	2.25	-0.00176	0.05553	2.25	-0.01485	-2.88695
2.27778	-0.000555	0.33083	2.27778	-6e-06	0.11139	2.27778	-0.000997	0.05393	2.27778	0.00254	0.06337	2.27778	-0.02998	-4.04477
2.30556	-0.000644	0.33588	2.30556	0.000729	0.09846	2.30556	0.00106	0.05823	2.30556	0.000489	0.03542	2.30556	-0.03124	-4.60698
2.33333	-0.000568	0.31932	2.33333	0.000109	0.07332	2.33333	0.000141	0.03269	2.33333	0.000105	0.05011	2.33333	-0.02798	-4.79319
2.36111	-0.000449	0.32064	2.36111	0.000614	0.05126	2.36111	-0.00218	0.04837	2.36111	0.000964	0.07144	2.36111	-0.03544	-4.73912
2.38889	-0.00125	0.32368	2.38889	-0.000848	0.01563	2.38889	-0.00103	0.04821	2.38889	0.00125	0.04445	2.38889	-0.03259	-4.31854
2.41667	0.00142	0.32122	2.41667	-0.000945	0.04513	2.41667	0.000947	0.04524	2.41667	0.000201	-0.18444	2.41667	-0.02893	-3.72932
2.44444	0.00152	0.31855	2.44444	-0.0015	0.04482	2.44444	-0.00176	0.02248	2.44444	-0.00531	-0.64133	2.44444	-0.02137	-3.09592
2.47222	-0.000133	0.31845	2.47222	0.000254	0.07122	2.47222	0.000616	0.04527	2.47222	-0.000683	-0.61273	2.47222	-0.02472	-2.65428
2.5	-0.00114	0.31193	2.5	0.000101	0.10195	2.5	-0.000134	0.01745	2.5	-0.0025	-0.89537	2.5	-0.02023	-2.24759
2.52778	-9.7e-05	0.32368	2.52778	0.00018	0.09954	2.52778	-0.000934	0.04922	2.52778	-0.00565	-1.14	2.52778	-0.01511	-1.87333
2.55556	-0.000144	0.32891	2.55556	0.000932	0.08275	2.55556	-0.00229	0.00827	2.55556	-0.00802	-1.3799	2.55556	-0.01737	-1.64542
2.58333	-0.00102	0.32393	2.58333	-0.002	0.03852	2.58333	-0.0016	0.02052	2.58333	-0.0051	-1.57837	2.58333	-0.01559	-1.36279
2.61111	0.000557	0.31623	2.61111	0.00107	0.00697	2.61111	0.00313	0.04198	2.61111	-0.0101	-1.7579	2.61111	-0.01255	-1.2337
2.63889	-0.000991	0.32681	2.63889	0.000407	0.04776	2.63889	0.000174	0.04318	2.63889	-0.0067	-1.87066	2.63889	-0.01509	-1.10946
2.66667	-0.0011	0.33714	2.66667	0.00153	0.06405	2.66667	-0.000569	0.02276	2.66667	-0.00986	-1.97873	2.66667	-0.01351	-1.04705
2.69444	0.000737	0.32268	2.69444	0.000788	0.07612	2.69444	0.000281	0.05283	2.69444	-0.01142	-2.12612	2.69444	-0.00736	-0.93158
2.72222	0.00108	0.32797	2.72222	2.7e-05	0.06133	2.72222	-0.00242	-0.1996	2.72222	-0.01009	-2.26844	2.72222	-0.01095	-0.83571
2.75	0.000127	0.32847	2.75	-0.000791	0.05925	2.75	-0.00404	-0.4837	2.75	-0.00919	-2.25603	2.75	-0.00618	-0.80261
2.77778	6.4e-05	0.32106	2.77778	-0.000733	0.07493	2.77778	0.00049	-0.27937	2.77778	-0.00989	-1.99983	2.77778	-0.01483	-0.73625
2.80556	-0.000442	0.32195	2.80556	0.000169	0.05619	2.80556	-0.000118	-0.41142	2.80556	-0.00841	-1.64335	2.80556	-0.00645	-0.69951
2.83333	0.000551	0.31019	2.83333	0.00104	0.05079	2.83333	-0.00402	-0.5192	2.83333	-0.01077	-1.42723	2.83333	-0.00716	-0.64625
2.86111	0.000459	0.3154	2.86111	-0.00131	0.00305	2.86111	-0.00407	-0.60638	2.86111	-0.01003	-1.19715	2.86111	-0.01054	-0.52806
2.88889	5.1e-05	0.32586	2.88889	0.00123	-0.00174	2.88889	-0.00364	-0.7014	2.88889	-0.00571	-1.0187	2.88889	-0.00583	-0.50101
2.91667	0.00011	0.32194	2.91667	0.000157	-0.04006	2.91667	-0.00436	-0.78831	2.91667	-0.00542	-0.8777	2.91667	-0.01094	-0.46337
2.94444	0.000169	0.33263	2.94444	-0.000753	0.0148	2.94444	-0.00317	-0.88136	2.94444	-0.00594	-0.75106	2.94444	-0.00726	-0.4204
2.97222	0.000578	0.32848	2.97222	-0.00146	0.05319	2.97222	-0.00444	-0.9735	2.97222	-0.00496	-0.69045	2.97222	-0.00427	-0.41751
3	-8.6e-05	0.31541	3	-0.000338	0.06142	3	-0.00369	-1.02245	3	-0.00315	-0.61627	3	-0.00335	-0.46429
3.02778	0.0012	0.33114	3.02778	-0.000828	0.05447	3.02778	-0.00415	-1.06225	3.02778	-0.00277	-0.54576	3.02778	-0.00128	-0.55615
3.05556	0.000536	0.33997	3.05556	0.00142	0.04499	3.05556	-0.00445	-1.14227	3.05556	-0.00603	-0.47495	3.05556	-0.01006	-0.50497
3.08333	0.000762	0.3202	3.08333	0.00142	-0.00392	3.08333	-0.00615	-1.1696	3.08333	-0.00266	-0.4104	3.08333	-0.00479	-0.43056
3.11111	-0.00037	0.3215	3.11111	0.00129	-0.00262	3.11111	-0.00661	-1.1746	3.11111	-0.00308	-0.37957	3.11111	-0.00245	-0.37033
3.13889	0.001	0.32107	3.13889	-0.000848	0.00697	3.13889	-0.00481	-1.21679	3.13889	-0.00412	-0.3933	3.13889	-0.00589	-0.36658
3.16667	-0.000729	0.3202	3.16667	0.00144	0.03217	3.16667	-0.00411	-1.18702	3.16667	-0.00575	-0.39125	3.16667	-0.01085	-0.35119
3.19444	0.000357	0.31338	3.19444	0.000669	0.07753	3.19444	-0.00296	-1.24982	3.19444	-0.00378	-0.36987	3.19444	-0.00818	-0.39137
3.22222	0.000279	0.33291	3.22222	-0.0005	0.06492	3.22222	-0.00489	-1.26055	3.22222	-0.00435	-0.38032	3.22222	-0.00455	-0.39952
3.25	0.000842	0.31323	3.25	0.00034	0.01549	3.25	-0.00353	-1.26689	3.25	-0.00465	-0.33784	3.25	-0.000544	-0.34922
3.27778	-0.000372	0.33109	3.27778	-0.000934	0.00784	3.27778	-0.00668	-1.33177	3.27778	-0.000111	-0.32629	3.27778	-0.00439	-0.30353
3.30556	-0.000433	0.33261	3.30556	-0.001	-0.01114	3.30556	-0.00494	-1.34311	3.30556	-0.00138	-0.27115	3.30556	-0.00696	-0.23647
3.33333	0.000107	0.33851	3.33333	1.1e-05	-0.04092	3.33333	-0.00484	-1.36645	3.33333	-0.0025	-0.20731	3.33333	-0.00224	-0.21274
3.36111	0.000635	0.31472	3.36111	0.000117	-0.47798	3.36111	-0.00407	-1.36358	3.36111	-0.00423	-0.22771	3.36111	-0.00206	-0.20476
3.38889	0.000504	0.28059	3.38889	-0.00132	-0.17445	3.38889	-0.00605	-1.32889	3.38889	-0.00366	-0.24745	3.38889	-0.00671	-0.25774
3.41667	0.00129	0.25112	3.41667	8.8e-05	-0.16785	3.41667	-0.00401	-1.29926	3.41667	-0.00161	-0.27349	3.41667	-0.01106	-0.29335
3.44444	0.000697	0.23954	3.44444	-0.00185	-0.18534	3.44444	-0.00368	-0.94925	3.44444	-0.00221	-0.29306	3.44444	-0.00641	-0.27878
3.47222	0.000411	0.20866	3.47222	-0.00196	-0.23526	3.47222	-0.00442	-0.95263	3.47222	-0.00361	-0.25573	3.47222	-0.0066	-0.23711
3.5	-0.000102	0.18995	3.5	5.3e-05	-0.28011	3.5	-0.00499	-0.81608	3.5	-0.00153	-0.22636	3.5	-0.0111	-0.21986
3.52778	0.00275	0.17906	3.52778	-0.000498	-0.33441	3.52778	-0.00276	-0.72274	3.52778	-0.00196	-0.18951	3.52778	-0.00667	-0.13866
3.55556	0.000276	0.15816	3.55556	-0.000324	-0.37569	3.55556	-0.00477	-0.62085	3.55556	-0.005	-0.19714	3.55556	-0.00743	-0.08642
3.58333	-0.000132	0.17127	3.58333	-0.000816	-0.41958	3.58333	-0.00513	-0.51792	3.58333	-0.00101	-0.19476	3.58333	-0.00224	-0.08424
3.61111	0.000873	0.1468	3.61111	-0.00144	-0.42991	3.61111	-0.00113	-0.44043	3.61111	-0.00143	-0.19492	3.61111	-0.000733	-0.1367
3.63889	0.00102	0.1385	3.63889	-0.00105	-0.48184	3.63889	-0.00149	-0.36923	3.63889	-0.000425	-0.1438	3.63889	0.000356	-0.19169
3.66667	0.000457	0.12573	3.66667	-0.00176	-0.51014	3.66667	-0.00531	-0.3768	3.66667	-0.000218	-0.14307	3.66667	-8.4e-05	-0.19361
3.69444	-0.000246	0.11676	3.69444	-0.00168	-0.52934	3.69444	-0.00442	-0.40348	3.69444	-0.00442	-0.15255	3.69444	-7.2e-05	-0.15312
3.72222	0.000951	0.11696	3.72222	-0.00264	-0.59073	3.72222	-0.00205	-0.41475	3.72222	-0.00132	-0.1757	3.72222	5.4e-05	-0.20403
3.75	0.000405	0.09717	3.75	-0.00202	-0.58862	3.75	-0.00255	-0.38659	3.75	-0.00289	-0.15159	3.75	-0.00581	-0.17862
3.77778	0.000554	0.09559	3.77778	-0.00269	-0.5922	3.77778	-0.00383	-0.37064	3.77778	-0.00375	-0.12721	3.77778	-0.00164	-0.14923
3.80556	-0.000248	0.08407	3.80556	-0.00209	-0.5969	3.80556	-0.000996	-0.32368	3.80556	-0.00104	-0.11894	3.80556	-0.00412	-0.08783
3.83333	-0.000661	0.09525	3.83333	-0.00214	-0.62168	3.83333	-0.00295	-0.22545	3.83333	-0.00436	-0.12285	3.83333	-0.00494	-0.02802
3.86111	0.00019	0.08096	3.86111	-0.00449	-0.62515	3.86111	-0.00258	-0.19691	3.86111	-0.0021	-0.12764	3.86111	-0.000424	-0.10165
3.88889	0.000222	0.09137	3.88889	-0.00319	-0.64555	3.88889	-0.000761	-0.20822	3.88889	-0.00193	-0.10282	3.88889	0.00174	-0.12995
3.91667	0.00157	0.07046	3.91667	-0.00161	-0.65291	3.91667	-0.00458	-0.2343	3.91667	-0.000808	-0.09914	3.91667	-0.003	-0.15986
3.94444	0.000995	0.06666	3.94444	-0.00216	-0.6478	3.94444	-0.00245	-0.25467	3.94444	-0.000314	-0.10018	3.94444	-0.00931	-0.15052
3.97222	-0.000274	0.06666	3.97222	-0.00397	-0.66192	3.97222	-0.0034	-0.25138	3.97222	-0.0048	-0.09127	3.97222	-0.00412	-0.08403
4	3.5e-05	0.06099	4	-0.00229	-0.6757	4	0.000239	-0.2359	4	-0.000822	-0.11111	4	-0.000449	-0.03847
4.02778	0.00128	0.06753	4.02778	-0.00255	-0.68135	4.02778	-0.00315	-0.25136	4.02778	-0.000931	-0.07686	4.02778	-0.00191	-0.04669
4.05556	8.1e-05	0.06621	4.05556	-0.00167	-0.67482	4.05556	-0.000372	-0.21263	4.05556	-0.00342	-0.04619	4.05556	0.000933	-0.02763
4.08333	0.00157	0.05795	4.08333	-0.00104	-0.68965	4.08333	-0.00147	-0.21473	4.08333	-0.00178	-0.0437	4.08333	-0.00303	-0.10673
4.11111	-0.00106	0.05446	4.11111	-0.00452	-0.7114	4.11111	0.0012	-0.18515	4.11111	-0.00245	-0.07119	4.11111	-0.00315	-0.14811
4.13889	0.00207	0.05402	4.13889	-0.00297	-0.71865	4.13889	-0.00277	-0.16373	4.13889	0.000198	-0.0976	4.13889	0.01008	-0.15136
4.16667	-0.000255	0.05703	4.16667	-0.00568	-0.73626	4.16667	-0.00224	-0.14497	4.16667	-0.0036	-0.07903	4.16667	-0.00255	-0.08569
4.19444	-0.000384	0.0434	4.19444	-0.002	-0.72941	4.19444	-0.00067	-0.1515	4.19444	-0.00628	-0.05436	4.19444	-0.00566	0.01888
4.22222	-0.000642	0.04967	4.22222	-0.0038	-0.72947	4.22222	-0.00191	-0.13723	4.22222	0.00195	-0.03966	4.22222	0.00417	0.0479
4.25	0.000523	0.03499	4.25	-0.00126	-0.72646	4.25	-0.00217	-0.15174	4.25	-0.000354	-0.0636	4.25	-0.00263	-0.01522
4.27778	-0.000919	0.05192	4.27778	-0.004	-0.74115	4.27778	-0.00147	-0.14819	4.27778	-0.00034	-0.0758	4.27778	-0.000738	-0.06606
4.30556	0.000939	0.03008	4.30556	-0.00225	-0.7576	4.30556	-0.00126	-0.12634	4.30556	-0.00438	-0.06273	4.30556	-0.00581	-0.10505
4.33333	-0.00058	0.04082	4.33333	-0.00335	-0.74148	4.33333	-0.00202	-0.12242	4.33333	-0.00176	-0.05011	4.33333	--	--
4.36111	-0.000282	0.04871	4.36111	-0.00214	-0.7454	4.36111	-0.00203	-0.1198	4.36111	0.00133	-0.03791	4.36111	--	--
4.38889	7.8e-05	0.04749	4.38889	-0.00259	-0.7541	4.38889	-0.00239	-0.11195	4.38889	-0.00243	-0.05332	4.38889	--	--
4.41667	0.000881	0.04575	4.41667	-0.000126	-0.74672	4.41667	-0.00225	-0.10044	4.41667	-0.00178	-0.03578	4.41667	--	--
4.44444	0.00156	0.04337	4.44444	-0.0024	-0.73887	4.44444	0.000462	-0.09885	4.44444	0.000901	-0.04966	4.44444	--	--
4.47222	0.00136	0.00174	4.47222	-0.00298	-0.77502	4.47222	0.000379	-0.09177	4.47222	-0.000497	-0.03913	4.47222	--	--
4.5	0.00151	0.04508	4.5	-0.00273	-0.77833	4.5	-0.000866	-0.09707	4.5	-0.00243	-0.01558	4.5	--	--
4.52778	-0.000439	0.01698	4.52778	-0.00221	-0.78586	4.52778	-0.00192	-0.10356	4.52778	-0.000974	-0.04779	4.52778	--	--
4.55556	-3.6e-05	0.01159	4.55556	-0.00337	-0.77444	4.55556	-0.00165	-0.08224	4.55556	-0.00247	-0.03128	4.55556	--	--
4.58333	0.000584	0.04351	4.58333	4.9e-05	-0.7806	4.58333	0.000607	-0.07187	4.58333	-0.00164	-0.02295	4.58333	--	--
4.61111	-0.000723	0.00871	4.61111	-0.00279	-0.78798	4.61111	-0.00211	-0.02514	4.61111	0.000258	-0.00697	4.61111	--	--
4.63889	0.00125	0.02883	4.63889	-0.00278	-0.80247	4.63889	0.000738	-0.05263	4.63889	0.000976	-0.0359	4.63889	--	--
4.66667	-0.000208	0.0328	4.66667	-0.00189	-0.78043	4.66667	0.000206	-0.06056	4.66667	0.00158	-0.05446	4.66667	--	--
4.69444	0.00053	0.00872	4.69444	-0.00326	-0.75102	4.69444	-0.00094	-0.08188	4.69444	-0.000899	-0.03638	4.69444	--	--
4.72222	-0.000513	0.03999	4.72222	-0.0031	-0.83963	4.72222	-0.00175	-0.09738	4.72222	--	--	4.72222	--	--
4.75	0.00135	0.0138	4.75	-0.00334	-0.46715	4.75	-0.000916	-0.08496	4.75	--	--	4.75	--	--
4.77778	0.000121	0.03174	4.77778	-0.00192	-0.43214	4.77778	-0.000778	-0.05137	4.77778	--	--	4.77778	--	--
4.80556	0.0004	0.02945	4.80556	-0.00277	-0.43913	4.80556	0.00102	-0.0092	4.80556	--	--	4.80556	--	--
4.83333	-7.4e-05	0.000874	4.83333	-0.00138	-0.41563	4.83333	0.00454	-0.05155	4.83333	--	--	4.83333	--	--
4.86111	0.000394	0.00501	4.86111	-0.0012	-0.39837	4.86111	0.000606	-0.03275	4.86111	--	--	4.86111	--	--
4.88889	0.000475	0.03354	4.88889	-0.00213	-0.36458	4.88889	-0.00171	-0.05316	4.88889	--	--	4.88889	--	--
4.91667	0.000905	0.02308	4.91667	-0.000611	-0.32716	4.91667	-0.00201	-0.04345	4.91667	--	--	4.91667	--	--
4.94444	-0.000151	0.000871	4.94444	-0.00176	-0.30714	4.94444	-8.4e-05	-0.04816	4.94444	--	--	4.94444	--	--
4.97222	-0.000912	0	4.97222	-0.00068	-0.27501	4.97222	0.000761	-0.06392	4.97222	--	--	4.97222	--	--
5	-0.000829	0.00305	5	-0.000324	-0.2637	5	-0.00129	-0.06105	5	--	--	5	--	--
5.02778	0.000109	0.05301	5.02778	-0.000226	-0.24718	5.02778	-0.00162	-0.02979	5.02778	--	--	5.02778	--	--
5.05556	0.00057	0.00645	5.05556	-0.00232	-0.22103	5.05556	0.000268	-0.04577	5.05556	--	--	5.05556	--	--
5.08333	-0.000454	0	5.08333	-0.00104	-0.21396	5.08333	0.00104	-0.04506	5.08333	--	--	5.08333	--	--
5.11111	-0.00043	0.000436	5.11111	-0.00153	-0.19953	5.11111	0.00059	-0.01787	5.11111	--	--	5.11111	--	--
5.13889	0.000209	0.00996	5.13889	-0.000998	-0.18994	5.13889	0.000435	-0.05164	5.13889	--	--	5.13889	--	--
5.16667	0.00106	0.0312	5.16667	6.6e-05	-0.17688	5.16667	0.00091	-0.01086	5.16667	--	--	5.16667	--	--
5.19444	-0.000171	0.01437	5.19444	0.000314	-0.1738	5.19444	0.000116	-0.0209	5.19444	--	--	5.19444	--	--
5.22222	-0.000136	-0.00132	5.22222	-0.000199	-0.16841	5.22222	-0.00189	-0.03622	5.22222	--	--	5.22222	--	--
5.25	-0.000147	0.00741	5.25	-0.00164	-0.15729	5.25	5.2e-05	-0.02746	5.25	--	--	5.25	--	--
5.27778	-0.000277	0.000433	5.27778	-0.00102	-0.15351	5.27778	-0.00231	-0.03954	5.27778	--	--	5.27778	--	--
5.30556	0.000508	0.000868	5.30556	-0.000142	-0.13897	5.30556	2.9e-05	-0.000434	5.30556	--	--	5.30556	--	--
5.33333	-0.000689	3e-06	5.33333	0.000849	-0.12808	5.33333	--	--	5.33333	--	--	5.33333	--	--
5.36111	-0.000641	-0.46001	5.36111	-0.00105	-0.12635	5.36111	--	--	5.36111	--	--	5.36111	--	--
5.38889	-0.00179	-0.12544	5.38889	0.000536	-0.11848	5.38889	--	--	5.38889	--	--	5.38889	--	--
5.41667	-0.000786	-0.08493	5.41667	-5.3e-05	-0.1185	5.41667	--	--	5.41667	--	--	5.41667	--	--
5.44444	-0.000442	-0.04446	5.44444	-1.4e-05	-0.11066	5.44444	--	--	5.44444	--	--	5.44444	--	--
5.47222	-0.000222	-0.06359	5.47222	-0.00106	-0.11459	5.47222	--	--	5.47222	--	--	5.47222	--	--
5.5	0.00112	-0.07449	5.5	0.00103	-0.11285	5.5	--	--	5.5	--	--	5.5	--	--
5.52778	-0.00015	-0.08902	5.52778	-0.00268	-0.08952	5.52778	--	--	5.52778	--	--	5.52778	--	--
5.55556	-0.00104	-0.10022	5.55556	0.000569	-0.07145	5.55556	--	--	5.55556	--	--	5.55556	--	--
5.58333	-0.00117	-0.13072	5.58333	-0.00127	-0.03554	5.58333	--	--	5.58333	--	--	5.58333	--	--
5.61111	-0.00108	-0.1312	5.61111	-0.000409	-0.04402	5.61111	--	--	5.61111	--	--	5.61111	--	--
5.63889	-0.000712	-0.17625	5.63889	-0.000959	-0.06229	5.63889	--	--	5.63889	--	--	5.63889	--	--
5.66667	-0.0013	-0.19604	5.66667	-0.00198	-0.06709	5.66667	--	--	5.66667	--	--	5.66667	--	--
5.69444	-0.000871	-0.17906	5.69444	0.000216	-0.07362	5.69444	--	--	5.69444	--	--	5.69444	--	--
5.72222	-0.000702	-0.19081	5.72222	-0.000382	-0.07623	5.72222	--	--	5.72222	--	--	5.72222	--	--
5.75	-0.000322	-0.19115	5.75	-0.0015	-0.08402	5.75	--	--	5.75	--	--	5.75	--	--
5.77778	0.000388	-0.21075	5.77778	-0.00107	-0.06868	5.77778	--	--	5.77778	--	--	5.77778	--	--
5.80556	-9e-05	-0.23906	5.80556	-1.7e-05	-0.06189	5.80556	--	--	5.80556	--	--	5.80556	--	--
5.83333	-0.00251	-0.26575	5.83333	-0.00229	-0.0529	5.83333	--	--	5.83333	--	--	5.83333	--	--
5.86111	-0.0021	-0.26832	5.86111	0.000104	-0.06753	5.86111	--	--	5.86111	--	--	5.86111	--	--
5.88889	-0.00239	-0.26905	5.88889	2.3e-05	-0.06621	5.88889	--	--	5.88889	--	--	5.88889	--	--
5.91667	-0.000387	-0.26487	5.91667	0.000518	-0.05838	5.91667	--	--	5.91667	--	--	5.91667	--	--
5.94444	-0.00139	-0.27598	5.94444	-0.000885	-0.04096	5.94444	--	--	5.94444	--	--	5.94444	--	--
5.97222	-0.00158	-0.28099	5.97222	-0.00127	-0.04402	5.97222	--	--	5.97222	--	--	5.97222	--	--
6	-0.000373	-0.26225	6	-0.000505	-0.045	6	--	--	6	--	--	6	--	--
6.02778	-0.000867	-0.27494	6.02778	0.000227	-0.04931	6.02778	--	--	6.02778	--	--	6.02778	--	--
6.05556	-0.00132	-0.26591	6.05556	-0.000762	-0.04271	6.05556	--	--	6.05556	--	--	6.05556	--	--
6.08333	-0.00246	-0.27183	6.08333	-0.00153	-0.02732	6.08333	--	--	6.08333	--	--	6.08333	--	--
6.11111	-0.000711	-0.27521	6.11111	0.000494	-0.00305	6.11111	--	--	6.11111	--	--	6.11111	--	--
6.13889	-0.000722	-0.28349	6.13889	-0.000733	-0.04589	6.13889	--	--	6.13889	--	--	6.13889	--	--
6.16667	-0.00127	-0.27873	6.16667	0.000532	-0.06274	6.16667	--	--	6.16667	--	--	6.16667	--	--
6.19444	-0.000491	-0.2839	6.19444	-4e-06	-0.0636	6.19444	--	--	6.19444	--	--	6.19444	--	--
6.22222	-0.0017	-0.30531	6.22222	-0.000512	-0.05228	6.22222	--	--	6.22222	--	--	6.22222	--	--
6.25	-0.000732	-0.29539	6.25	-0.000271	-0.03661	6.25	--	--	6.25	--	--	6.25	--	--
6.27778	-0.00101	-0.29712	6.27778	0.000231	-0.04745	6.27778	--	--	6.27778	--	--	6.27778	--	--
6.30556	-0.00165	-0.30452	6.30556	-0.000753	-0.00349	6.30556	--	--	6.30556	--	--	6.30556	--	--
6.33333	6e-06	-0.29406	6.33333	-0.00131	-6.9e-05	6.33333	--	--	6.33333	--	--	6.33333	--	--
6.36111	-0.0012	-0.29603	6.36111	-0.000732	-0.00117	6.36111	--	--	6.36111	--	--	6.36111	--	--
6.38889	-0.00236	-0.29451	6.38889	-0.000447	-0.01149	6.38889	--	--	6.38889	--	--	6.38889	--	--
6.41667	-0.00159	-0.30495	6.41667	-0.000706	-0.03757	6.41667	--	--	6.41667	--	--	6.41667	--	--
6.44444	-0.000896	-0.30366	6.44444	-0.00169	-0.01219	6.44444	--	--	6.44444	--	--	6.44444	--	--
6.47222	-0.00131	-0.30321	6.47222	0.000937	-0.00131	6.47222	--	--	6.47222	--	--	6.47222	--	--
6.5	-0.00265	-0.31094	6.5	0.00116	-0.03282	6.5	--	--	6.5	--	--	6.5	--	--
6.52778	-0.000954	-0.29874	6.52778	-0.000185	-0.02707	6.52778	--	--	6.52778	--	--	6.52778	--	--
6.55556	-0.00169	-0.30714	6.55556	0.000666	-0.00174	6.55556	--	--	6.55556	--	--	6.55556	--	--
6.58333	-0.00202	-0.30539	6.58333	-0.000994	-0.00696	6.58333	--	--	6.58333	--	--	6.58333	--	--
6.61111	0.000163	-0.31628	6.61111	-0.000879	-0.0342	6.61111	--	--	6.61111	--	--	6.61111	--	--
6.63889	-0.00122	-0.31192	6.63889	-0.00182	-0.0209	6.63889	--	--	6.63889	--	--	6.63889	--	--
6.66667	-0.00187	-0.32237	6.66667	-0.000204	-0.00087	6.66667	--	--	6.66667	--	--	6.66667	--	--
6.69444	-0.00143	-0.31324	6.69444	--	--	6.69444	--	--	6.69444	--	--	6.69444	--	--
6.72222	-0.00202	-0.31715	6.72222	--	--	6.72222	--	--	6.72222	--	--	6.72222	--	--
6.75	-0.000986	-0.3137	6.75	--	--	6.75	--	--	6.75	--	--	6.75	--	--
6.77778	-0.000527	-0.31577	6.77778	--	--	6.77778	--	--	6.77778	--	--	6.77778	--	--
6.80556	-0.00141	-0.31291	6.80556	--	--	6.80556	--	--	6.80556	--	--	6.80556	--	--
6.83333	-0.00144	-0.31266	6.83333	--	--	6.83333	--	--	6.83333	--	--	6.83333	--	--
6.86111	-0.000656	-0.31732	6.86111	--	--	6.86111	--	--	6.86111	--	--	6.86111	--	--
6.88889	-0.00162	-0.31032	6.88889	--	--	6.88889	--	--	6.88889	--	--	6.88889	--	--
6.91667	-0.000165	-0.31454	6.91667	--	--	6.91667	--	--	6.91667	--	--	6.91667	--	--
6.94444	-0.00095	-0.3093	6.94444	--	--	6.94444	--	--	6.94444	--	--	6.94444	--	--
6.97222	-0.002	-0.32238	6.97222	--	--	6.97222	--	--	6.97222	--	--	6.97222	--	--
7	-0.00192	-0.33848	7	--	--	7	--	--	7	--	--	7	--	--
7.02778	-0.000766	-0.33303	7.02778	--	--	7.02778	--	--	7.02778	--	--	7.02778	--	--
7.05556	-0.00101	-0.3246	7.05556	--	--	7.05556	--	--	7.05556	--	--	7.05556	--	--
7.08333	-0.00211	-0.32063	7.08333	--	--	7.08333	--	--	7.08333	--	--	7.08333	--	--
7.11111	-0.0014	-0.31542	7.11111	--	--	7.11111	--	--	7.11111	--	--	7.11111	--	--
7.13889	-0.000277	-0.32803	7.13889	--	--	7.13889	--	--	7.13889	--	--	7.13889	--	--
7.16667	-0.00198	-0.33283	7.16667	--	--	7.16667	--	--	7.16667	--	--	7.16667	--	--
7.19444	-0.00214	-0.31715	7.19444	--	--	7.19444	--	--	7.19444	--	--	7.19444	--	--
7.22222	-0.00134	-0.3351	7.22222	--	--	7.22222	--	--	7.22222	--	--	7.22222	--	--
7.25	-0.00177	-0.3186	7.25	--	--	7.25	--	--	7.25	--	--	7.25	--	--
7.27778	-0.000923	-0.32717	7.27778	--	--	7.27778	--	--	7.27778	--	--	7.27778	--	--
7.30556	-0.00174	-0.33187	7.30556	--	--	7.30556	--	--	7.30556	--	--	7.30556	--	--
7.33333	-0.000663	-0.32836	7.33333	--	--	7.33333	--	--	7.33333	--	--	7.33333	--	--
7.36111	-0.00208	-0.3276	7.36111	--	--	7.36111	--	--	7.36111	--	--	7.36111	--	--
7.38889	-0.00167	-0.32649	7.38889	--	--	7.38889	--	--	7.38889	--	--	7.38889	--	--
7.41667	-0.00149	-0.3242	7.41667	--	--	7.41667	--	--	7.41667	--	--	7.41667	--	--
7.44444	-0.000696	-0.32849	7.44444	--	--	7.44444	--	--	7.44444	--	--	7.44444	--	--
7.47222	-0.000269	-0.33325	7.47222	--	--	7.47222	--	--	7.47222	--	--	7.47222	--	--
7.5	-0.000507	-0.32935	7.5	--	--	7.5	--	--	7.5	--	--	7.5	--	--
7.52778	-0.00143	-0.33243	7.52778	--	--	7.52778	--	--	7.52778	--	--	7.52778	--	--
7.55556	-0.000728	-0.3304	7.55556	--	--	7.55556	--	--	7.55556	--	--	7.55556	--	--
7.58333	-0.000583	-0.31498	7.58333	--	--	7.58333	--	--	7.58333	--	--	7.58333	--	--
7.61111	-0.00286	-0.32151	7.61111	--	--	7.61111	--	--	7.61111	--	--	7.61111	--	--
7.63889	-0.00194	-0.33207	7.63889	--	--	7.63889	--	--	7.63889	--	--	7.63889	--	--
7.66667	-0.00215	-0.32821	7.66667	--	--	7.66667	--	--	7.66667	--	--	7.66667	--	--
7.69444	-0.00187	-0.32455	7.69444	--	--	7.69444	--	--	7.69444	--	--	7.69444	--	--
7.72222	0.000722	-0.335	7.72222	--	--	7.72222	--	--	7.72222	--	--	7.72222	--	--
7.75	-0.00123	-0.33041	7.75	--	--	7.75	--	--	7.75	--	--	7.75	--	--
7.77778	-0.00122	-0.33158	7.77778	--	--	7.77778	--	--	7.77778	--	--	7.77778	--	--
7.80556	-0.000218	-0.33499	7.80556	--	--	7.80556	--	--	7.80556	--	--	7.80556	--	--
7.83333	-0.00118	-0.3176	7.83333	--	--	7.83333	--	--	7.83333	--	--	7.83333	--	--
7.86111	-0.000546	-0.32913	7.86111	--	--	7.86111	--	--	7.86111	--	--	7.86111	--	--
7.88889	-0.00191	-0.32543	7.88889	--	--	7.88889	--	--	7.88889	--	--	7.88889	--	--
7.91667	-0.00183	-0.33762	7.91667	--	--	7.91667	--	--	7.91667	--	--	7.91667	--	--
7.94444	5e-05	-0.33334	7.94444	--	--	7.94444	--	--	7.94444	--	--	7.94444	--	--
7.97222	0.000713	-0.34691	7.97222	--	--	7.97222	--	--	7.97222	--	--	7.97222	--	--
8	-0.000147	-0.33109	8	--	--	8	--	--	8	--	--	8	--	--
8.02778	-0.00215	-0.32578	8.02778	--	--	8.02778	--	--	8.02778	--	--	8.02778	--	--
8.05556	-0.00113	-0.33619	8.05556	--	--	8.05556	--	--	8.05556	--	--	8.05556	--	--
8.08333	-0.00148	-0.32978	8.08333	--	--	8.08333	--	--	8.08333	--	--	8.08333	--	--
8.11111	-0.000465	-0.3465	8.11111	--	--	8.11111	--	--	8.11111	--	--	8.11111	--	--
8.13889	-0.000715	-0.34679	8.13889	--	--	8.13889	--	--	8.13889	--	--	8.13889	--	--
8.16667	-0.00174	-0.34615	8.16667	--	--	8.16667	--	--	8.16667	--	--	8.16667	--	--
8.19444	-0.000357	-0.33065	8.19444	--	--	8.19444	--	--	8.19444	--	--	8.19444	--	--
8.22222	-0.00127	-0.33525	8.22222	--	--	8.22222	--	--	8.22222	--	--	8.22222	--	--
8.25	-0.00209	-0.33239	8.25	--	--	8.25	--	--	8.25	--	--	8.25	--	--
8.27778	0.000315	-0.33326	8.27778	--	--	8.27778	--	--	8.27778	--	--	8.27778	--	--
8.30556	-0.00161	-0.34466	8.30556	--	--	8.30556	--	--	8.30556	--	--	8.30556	--	--
8.33333	0.000267	-0.33386	8.33333	--	--	8.33333	--	--	8.33333	--	--	8.33333	--	--
8.36111	-0.00135	-0.30975	8.36111	--	--	8.36111	--	--	8.36111	--	--	8.36111	--	--
8.38889	-0.00225	-0.33892	8.38889	--	--	8.38889	--	--	8.38889	--	--	8.38889	--	--
8.41667	-0.00147	-0.32774	8.41667	--	--	8.41667	--	--	8.41667	--	--	8.41667	--	--
8.44444	-0.000372	-0.33292	8.44444	--	--	8.44444	--	--	8.44444	--	--	8.44444	--	--
8.47222	-0.00126	-0.33544	8.47222	--	--	8.47222	--	--	8.47222	--	--	8.47222	--	--
8.5	-0.0017	-0.34238	8.5	--	--	8.5	--	--	8.5	--	--	8.5	--	--
8.52778	-0.0014	-0.34549	8.52778	--	--	8.52778	--	--	8.52778	--	--	8.52778	--	--
8.55556	0.000564	-0.34201	8.55556	--	--	8.55556	--	--	8.55556	--	--	8.55556	--	--
8.58333	-0.00132	-0.33501	8.58333	--	--	8.58333	--	--	8.58333	--	--	8.58333	--	--
8.61111	-0.00154	-0.32063	8.61111	--	--	8.61111	--	--	8.61111	--	--	8.61111	--	--
8.63889	-0.00121	-0.33309	8.63889	--	--	8.63889	--	--	8.63889	--	--	8.63889	--	--
8.66667	-0.000749	-0.34063	8.66667	--	--	8.66667	--	--	8.66667	--	--	8.66667	--	--
8.69444	-0.000607	-0.31572	8.69444	--	--	8.69444	--	--	8.69444	--	--	8.69444	--	--
8.72222	-0.00137	-0.40189	8.72222	--	--	8.72222	--	--	8.72222	--	--	8.72222	--	--
8.75	-0.00171	-0.22253	8.75	--	--	8.75	--	--	8.75	--	--	8.75	--	--
8.77778	-0.000479	-0.20181	8.77778	--	--	8.77778	--	--	8.77778	--	--	8.77778	--	--
8.80556	2.5e-05	-0.15073	8.80556	--	--	8.80556	--	--	8.80556	--	--	8.80556	--	--
8.83333	-0.000879	-0.1278	8.83333	--	--	8.83333	--	--	8.83333	--	--	8.83333	--	--
8.86111	-0.00169	-0.13342	8.86111	--	--	8.86111	--	--	8.86111	--	--	8.86111	--	--
8.88889	-0.00139	-0.11039	8.88889	--	--	8.88889	--	--	8.88889	--	--	8.88889	--	--
8.91667	-0.00122	-0.08846	8.91667	--	--	8.91667	--	--	8.91667	--	--	8.91667	--	--
8.94444	-0.000263	-0.10912	8.94444	--	--	8.94444	--	--	8.94444	--	--	8.94444	--	--
8.97222	-0.000306	-0.11676	8.97222	--	--	8.97222	--	--	8.97222	--	--	8.97222	--	--
9	-0.0015	-0.11239	9	--	--	9	--	--	9	--	--	9	--	--
9.02778	-0.000767	-0.09842	9.02778	--	--	9.02778	--	--	9.02778	--	--	9.02778	--	--
9.05556	-0.000608	-0.08176	9.05556	--	--	9.05556	--	--	9.05556	--	--	9.05556	--	--
9.08333	0.000185	-0.10055	9.08333	--	--	9.08333	--	--	9.08333	--	--	9.08333	--	--
9.11111	8.8e-05	-0.07711	9.11111	--	--	9.11111	--	--	9.11111	--	--	9.11111	--	--
9.13889	-0.00147	-0.09204	9.13889	--	--	9.13889	--	--	9.13889	--	--	9.13889	--	--
9.16667	-0.00186	-0.08157	9.16667	--	--	9.16667	--	--	9.16667	--	--	9.16667	--	--
9.19444	0.000345	-0.09059	9.19444	--	--	9.19444	--	--	9.19444	--	--	9.19444	--	--
9.22222	-0.000488	-0.10231	9.22222	--	--	9.22222	--	--	9.22222	--	--	9.22222	--	--
9.25	7e-05	-0.09543	9.25	--	--	9.25	--	--	9.25	--	--	9.25	--	--
9.27778	-0.00195	-0.09238	9.27778	--	--	9.27778	--	--	9.27778	--	--	9.27778	--	--
9.30556	0.000727	-0.08059	9.30556	--	--	9.30556	--	--	9.30556	--	--	9.30556	--	--
9.33333	-0.000444	-0.06187	9.33333	--	--	9.33333	--	--	9.33333	--	--	9.33333	--	--
9.36111	-0.0013	-0.06056	9.36111	--	--	9.36111	--	--	9.36111	--	--	9.36111	--	--
9.38889	0.00171	-0.06361	9.38889	--	--	9.38889	--	--	9.38889	--	--	9.38889	--	--
9.41667	-0.000275	-0.05097	9.41667	--	--	9.41667	--	--	9.41667	--	--	9.41667	--	--
9.44444	-0.000431	-0.0252	9.44444	--	--	9.44444	--	--	9.44444	--	--	9.44444	--	--
9.47222	4.5e-05	-0.03778	9.47222	--	--	9.47222	--	--	9.47222	--	--	9.47222	--	--
9.5	-0.00129	-0.03779	9.5	--	--	9.5	--	--	9.5	--	--	9.5	--	--
9.52778	-0.00158	-0.04695	9.52778	--	--	9.52778	--	--	9.52778	--	--	9.52778	--	--
9.55556	-0.00042	-0.04967	9.55556	--	--	9.55556	--	--	9.55556	--	--	9.55556	--	--
9.58333	0.000195	-0.03576	9.58333	--	--	9.58333	--	--	9.58333	--	--	9.58333	--	--
9.61111	-0.00068	-0.04424	9.61111	--	--	9.61111	--	--	9.61111	--	--	9.61111	--	--
9.63889	-0.00166	-0.05225	9.63889	--	--	9.63889	--	--	9.63889	--	--	9.63889	--	--
9.66667	-1.3e-05	-0.022	9.66667	--	--	9.66667	--	--	9.66667	--	--	9.66667	--	--
9.69444	-0.000139	-0.04532	9.69444	--	--	9.69444	--	--	9.69444	--	--	9.69444	--	--
9.72222	-0.000968	-0.00716	9.72222	--	--	9.72222	--	--	9.72222	--	--	9.72222	--	--
9.75	-0.000442	-0.04537	9.75	--	--	9.75	--	--	9.75	--	--	9.75	--	--
9.77778	-0.000354	-0.01931	9.77778	--	--	9.77778	--	--	9.77778	--	--	9.77778	--	--
9.80556	4.9e-05	-0.02187	9.80556	--	--	9.80556	--	--	9.80556	--	--	9.80556	--	--
9.83333	-0.00161	-0.02887	9.83333	--	--	9.83333	--	--	9.83333	--	--	9.83333	--	--
9.86111	0.000226	-0.00218	9.86111	--	--	9.86111	--	--	9.86111	--	--	9.86111	--	--
9.88889	-0.00195	-0.00515	9.88889	--	--	9.88889	--	--	9.88889	--	--	9.88889	--	--
9.91667	0.000402	-0.04603	9.91667	--	--	9.91667	--	--	9.91667	--	--	9.91667	--	--
9.94444	-3.4e-05	-0.01869	9.94444	--	--	9.94444	--	--	9.94444	--	--	9.94444	--	--
9.97222	-0.000888	-0.03665	9.97222	--	--	9.97222	--	--	9.97222	--	--	9.97222	--	--
10	-0.000901	-0.02085	10	--	--	10	--	--	10	--	--	10	--	--
10.0278	8.4e-05	-0.01571	10.0278	--	--	10.0278	--	--	10.0278	--	--	10.0278	--	--
10.0556	2.9e-05	-0.03875	10.0556	--	--	10.0556	--	--	10.0556	--	--	10.0556	--	--
10.0833	-0.000144	-0.00915	10.0833	--	--	10.0833	--	--	10.0833	--	--	10.0833	--	--
10.1111	-0.000524	-0.00392	10.1111	--	--	10.1111	--	--	10.1111	--	--	10.1111	--	--
10.1389	0.000591	-0.02903	10.1389	--	--	10.1389	--	--	10.1389	--	--	10.1389	--	--
10.1667	0.000284	-0.02781	10.1667	--	--	10.1667	--	--	10.1667	--	--	10.1667	--	--
10.1944	-0.000646	-0.01513	10.1944	--	--	10.1944	--	--	10.1944	--	--	10.1944	--	--
10.2222	-0.00117	-0.02909	10.2222	--	--	10.2222	--	--	10.2222	--	--	10.2222	--	--
10.25	0.000211	0.02171	10.25	--	--	10.25	--	--	10.25	--	--	10.25	--	--
10.2778	0.00105	0.01685	10.2778	--	--	10.2778	--	--	10.2778	--	--	10.2778	--	--
10.3056	-0.000901	-0.02347	10.3056	--	--	10.3056	--	--	10.3056	--	--	10.3056	--	--
10.3333	-0.000473	-0.03467	10.3333	--	--	10.3333	--	--	10.3333	--	--	10.3333	--	--
10.3611	0.00152	-0.00087	10.3611	--	--	10.3611	--	--	10.3611	--	--	10.3611	--	--
10.3889	-0.000514	-0.02134	10.3889	--	--	10.3889	--	--	10.3889	--	--	10.3889	--	--
10.4167	-0.00111	-0.03965	10.4167	--	--	10.4167	--	--	10.4167	--	--	10.4167	--	--
10.4444	0.000442	-0.00239	10.4444	--	--	10.4444	--	--	10.4444	--	--	10.4444	--	--
10.4722	-0.000462	-0.00262	10.4722	--	--	10.4722	--	--	10.4722	--	--	10.4722	--	--
10.5	0.000639	-0.000864	10.5	--	--	10.5	--	--	10.5	--	--	10.5	--	--
10.5278	-0.000676	0.00435	10.5278	--	--	10.5278	--	--	10.5278	--	--	10.5278	--	--
10.5556	0.000292	-0.01294	10.5556	--	--	10.5556	--	--	10.5556	--	--	10.5556	--	--
10.5833	-0.00059	0.00674	10.5833	--	--	10.5833	--	--	10.5833	--	--	10.5833	--	--
10.6111	-0.000331	0.00533	10.6111	--	--	10.6111	--	--	10.6111	--	--	10.6111	--	--
10.6389	7.8e-05	0.00756	10.6389	--	--	10.6389	--	--	10.6389	--	--	10.6389	--	--

## Sheet: Fig5c-1
0.02778	-0.000938	0.05668	20.3188
0.05556	-0.00275	-0.07408	20.3754
0.08333	-0.00225	-0.604	20.3013
0.11111	-0.00133	-0.6718	19.6974
0.13889	0.000503	-0.69792	19.0255
0.16667	-0.00301	-0.73191	18.3276
0.19444	-0.000956	-0.79552	17.5957
0.22222	-0.00253	-0.84762	16.8002
0.25	-0.00252	-0.901	15.9526
0.27778	-0.00285	-0.92663	15.0516
0.30556	-0.00528	-1.00123	14.1249
0.33333	-0.00564	-1.06018	13.1237
0.36111	-0.00291	-1.12182	12.0635
0.38889	-0.00261	-1.16742	10.9417
0.41667	-0.00476	-1.20355	9.77429
0.44444	-0.00322	-1.23722	8.57074
0.47222	-0.00574	-1.2808	7.33351
0.5	-0.00621	-1.25904	6.05272
0.52778	-0.00676	-1.32919	4.79367
0.55556	-0.00552	-1.337	3.46448
0.58333	-0.00546	-1.33643	2.12748
0.61111	-0.00989	-1.38101	0.79105
0.63889	-0.00574	-1.38396	-0.58996
0.66667	-0.00933	-1.44681	-1.97392
0.69444	-0.00708	-1.45934	-3.42073
0.72222	-0.0074	-1.4261	-4.88007
0.75	-0.00544	-1.388	-6.30617
0.77778	-0.00806	-1.36928	-7.69417
0.80556	-0.00621	-1.3488	-9.06345
0.83333	-0.00611	-1.35512	-10.4123
0.86111	-0.00512	-1.28171	-11.7674
0.88889	-0.00554	-1.23032	-13.0491
0.91667	-0.00469	-1.26034	-14.2794
0.94444	-0.00522	-1.22827	-15.5397
0.97222	-0.00426	-1.2024	-16.768
1	-0.00269	-1.19806	-17.9704
1.02778	-0.00687	-1.206	-19.1685
1.05556	-0.00438	-1.15559	-20.3745
1.08333	-0.00444	-1.16667	-21.5301
1.11111	-0.00595	-1.12226	-22.6968
1.13889	-0.00525	-1.12356	-23.819
1.16667	-0.00262	-1.12006	-24.9426
1.19444	-0.00392	-1.04042	-26.0626
1.22222	-0.00555	-0.96191	-27.103
1.25	-0.00633	-0.82032	-28.065
1.27778	-0.00308	-0.71009	-28.8853
1.30556	-0.00388	-0.63364	-29.5954
1.33333	-0.0039	-0.57928	-30.229
1.36111	-0.00228	-0.50362	-30.8083
1.38889	-0.00164	-0.46475	-31.3119
1.41667	-0.00303	-0.41703	-31.7767
1.44444	-0.00391	-0.37291	-32.1937
1.47222	-0.00404	-0.34425	-32.5666
1.5	-0.00109	-0.30365	-32.9108
1.52778	-0.000734	-0.29539	-33.2145
1.55556	-0.000436	-0.28994	-33.5099
1.58333	-0.00269	-0.26531	-33.7998
1.61111	-0.00103	-0.2566	-34.0651
1.63889	0.000395	-0.24887	-34.3217
1.66667	0.000205	-0.21949	-34.5706
1.69444	8.5e-05	-0.21721	-34.7901
1.72222	-0.00155	-0.20693	-35.0073
1.75	-0.00488	-0.19082	-35.2142
1.77778	-0.00168	-0.176	-35.4051
1.80556	-0.000492	-0.1662	-35.581
1.83333	0.000264	-0.15564	-35.7472
1.86111	-0.00169	-0.15392	-35.9029
1.88889	0.000515	-0.13373	-36.0568
1.91667	0.00285	-0.13026	-36.1905
1.94444	-0.000676	-0.13635	-36.3208
1.97222	0.00166	-0.11807	-36.4572
2	-0.00125	-0.11371	-36.5752
2.02778	-0.000175	-0.11591	-36.6889
2.05556	-0.00065	-0.09996	-36.8049
2.08333	0.00127	-0.09803	-36.9048
2.11111	0.00242	-0.0917	-37.0028
2.13889	0.000104	-0.10415	-37.0945
2.16667	0.00212	-0.08687	-37.1987
2.19444	0.00176	-0.071	-37.2856
2.22222	0.000574	-0.07873	-37.3565
2.25	0.00238	-0.07658	-37.4353
2.27778	0.000886	-0.07187	-37.5119
2.30556	0.00209	-0.05447	-37.5837
2.33333	-0.000218	-0.07014	-37.6382
2.36111	0.00202	-0.0636	-37.7084
2.38889	0.00144	-0.05489	-37.7719
2.41667	-6.7e-05	-0.04946	-37.8268
2.44444	0.00476	-0.05401	-37.8763
2.47222	0.00197	-0.05054	-37.9303
2.5	0.00128	-0.04488	-37.9808
2.52778	0.00269	-0.04069	-38.0257
2.55556	0.00266	-0.05407	-38.0664
2.58333	0.00248	-0.01963	-38.1205
2.61111	0.00416	-0.04259	-38.1401
2.63889	0.000215	-0.04172	-38.1827
2.66667	0.00203	-0.02426	-38.2244
2.69444	0.00196	-0.02564	-38.2487
2.72222	0.00501	-0.0373	-38.2743
2.75	0.00176	-0.02175	-38.3116
2.77778	0.00355	-0.03858	-38.3334
2.80556	0.000969	-0.02961	-38.3719
2.83333	0.00224	-0.03464	-38.4016
2.86111	0.00116	-0.01266	-38.4362
2.88889	0.000457	-0.03633	-38.4489
2.91667	0.000422	-0.01437	-38.4852
2.94444	-0.00125	-0.01349	-38.4996
2.97222	0.00317	-0.01361	-38.5131
3	-0.000554	-0.03192	-38.5267
3.02778	0.00193	-0.00609	-38.5586
3.05556	0.00181	0.09953	-38.5647
3.08333	0.00478	0.27494	-38.4651
3.11111	0.00233	0.45516	-38.1902
3.13889	0.00515	0.60461	-37.7351
3.16667	0.0057	0.72321	-37.1304
3.19444	0.00571	0.82471	-36.4072
3.22222	0.00359	0.90619	-35.5825
3.25	0.00314	0.99136	-34.6763
3.27778	0.00578	1.0518	-33.685
3.30556	0.00906	1.28111	-32.6332
3.33333	0.00867	1.29999	-31.3521
3.36111	0.00783	1.19432	-30.0521
3.38889	0.00643	1.13505	-28.8578
3.41667	0.00959	1.15973	-27.7227
3.44444	0.00842	1.1802	-26.563
3.47222	0.0101	1.23808	-25.3828
3.5	0.01134	1.22357	-24.1447
3.52778	0.00953	1.22331	-22.9211
3.55556	0.01138	1.22964	-21.6978
3.58333	0.00867	1.23244	-20.4682
3.61111	0.00847	1.24783	-19.2357
3.63889	0.01151	1.27604	-17.9879
3.66667	0.01045	1.27826	-16.7119
3.69444	0.0109	1.31829	-15.4336
3.72222	0.0096	1.33787	-14.1153
3.75	0.00971	1.40034	-12.7774
3.77778	0.00852	1.54234	-11.3771
3.80556	0.00873	1.49489	-9.83477
3.83333	0.00923	1.38941	-8.33988
3.86111	0.00873	1.32899	-6.95047
3.88889	0.00771	1.37405	-5.62148
3.91667	0.00633	1.3974	-4.24743
3.94444	0.0091	1.41497	-2.85003
3.97222	0.00941	1.43575	-1.43506
4	0.00664	1.42677	0.000684
4.02778	0.00864	1.43855	1.42745
4.05556	0.00782	1.38736	2.866
4.08333	0.00327	1.2136	4.25336
4.11111	0.00369	1.0719	5.46696
4.13889	0.00508	0.92503	6.53886
4.16667	0.00524	0.79823	7.46389
4.19444	0.00465	0.72845	8.26212
4.22222	0.00519	0.65545	8.99057
4.25	0.00368	0.55331	9.64602
4.27778	0.00429	0.52735	10.1993
4.30556	0.00165	0.49224	10.7267
4.33333	0.00273	0.44785	11.2189
4.36111	-0.00064	0.4003	11.6668
4.38889	0.00248	0.35811	12.0671
4.41667	0.00264	0.35017	12.4252
4.44444	0.00119	0.35939	12.7754
4.47222	0.00176	0.32499	13.1348
4.5	0.00039	0.28842	13.4597
4.52778	-0.00126	0.28624	13.7482
4.55556	0.000965	0.28321	14.0344
4.58333	0.00112	0.25616	14.3176
4.61111	0.00204	0.22395	14.5738
4.63889	0.00101	0.23675	14.7977
4.66667	0.000195	0.21438	15.0345
4.69444	0.00332	0.20843	15.2488
4.72222	0.00396	0.20256	15.4573
4.75	0.00225	0.17689	15.6598
4.77778	0.000853	0.18646	15.8367
4.80556	0.00162	0.16643	16.0232
4.83333	0.000821	0.17412	16.1896
4.86111	-0.000166	0.17635	16.3637
4.88889	0.00123	0.16296	16.5401
4.91667	0.00394	0.16036	16.703
4.94444	-0.000253	0.15377	16.8634
4.97222	3.4e-05	0.1577	17.0172
5	0.00295	0.13745	17.1749
5.02778	0.00236	0.1333	17.3123
5.05556	0.00119	0.12852	17.4456
5.08333	0.00151	0.13468	17.5741
5.11111	-0.000758	0.1153	17.7088
5.13889	-0.000959	0.09115	17.8241
5.16667	-0.00247	0.10815	17.9153
5.19444	0.00126	0.10468	18.0234
5.22222	0.00103	0.10071	18.1281
5.25	0.00107	0.08033	18.2288
5.27778	0.00294	0.07673	18.3091
5.30556	0.000732	0.07798	18.3859
5.33333	0.00209	0.08145	18.4638
5.36111	0.00213	0.08083	18.5453
5.38889	0.00107	0.06491	18.6261
5.41667	-0.000596	0.06795	18.691
5.44444	0.00236	0.06578	18.759
5.47222	0.00117	0.06404	18.8248
5.5	0.000627	0.06056	18.8888
5.52778	0.000898	0.05228	18.9494
5.55556	-0.00087	0.05389	19.0016
5.58333	0.00162	0.04696	19.0555
5.61111	-0.000219	0.04749	19.1025
5.63889	-0.00256	0.03752	19.15
5.66667	0.000336	0.04461	19.1875
5.69444	-0.000298	0.03052	19.2321
5.72222	-0.000256	0.04943	19.2626
5.75	0.00155	0.034	19.3121
5.77778	-0.00134	0.02893	19.3461
5.80556	-0.00156	0.03969	19.375
5.83333	0.00195	0.02281	19.4147
5.86111	-0.001	0.04668	19.4375
5.88889	-0.000123	0.01833	19.4842
5.91667	0.00139	0.04909	19.5025
5.94444	0.00132	0.01213	19.5516
5.97222	0.00108	0.02252	19.5637
6	0.00141	0.03222	19.5862
6.02778	--	--	--
6.05556	--	--	--
6.08333	--	--	--
6.11111	--	--	--
6.13889	--	--	--
6.16667	--	--	--
6.19444	--	--	--
6.22222	--	--	--
6.25	--	--	--
6.27778	--	--	--
6.30556	--	--	--
6.33333	--	--	--
6.36111	--	--	--
6.38889	--	--	--
6.41667	--	--	--
6.44444	--	--	--
6.47222	--	--	--
6.5	--	--	--
6.52778	--	--	--
6.55556	--	--	--
6.58333	--	--	--
6.61111	--	--	--
6.63889	--	--	--
6.66667	--	--	--
6.69444	--	--	--
6.72222	--	--	--
6.75	--	--	--
6.77778	--	--	--
6.80556	--	--	--
6.83333	--	--	--
6.86111	--	--	--
6.88889	--	--	--
6.91667	--	--	--
6.94444	--	--	--
6.97222	--	--	--
7	--	--	--
7.02778	--	--	--
7.05556	--	--	--
7.08333	--	--	--
7.11111	--	--	--
7.13889	--	--	--
7.16667	--	--	--
7.19444	--	--	--
7.22222	--	--	--
7.25	--	--	--
7.27778	--	--	--
7.30556	--	--	--
7.33333	--	--	--
7.36111	--	--	--
7.38889	--	--	--
7.41667	--	--	--
7.44444	--	--	--
7.47222	--	--	--
7.5	--	--	--
7.52778	--	--	--
7.55556	--	--	--
7.58333	--	--	--
7.61111	--	--	--
7.63889	--	--	--
7.66667	--	--	--
7.69444	--	--	--
7.72222	--	--	--
7.75	--	--	--
7.77778	--	--	--
7.80556	--	--	--
7.83333	--	--	--
7.86111	--	--	--
7.88889	--	--	--
7.91667	--	--	--
7.94444	--	--	--
7.97222	--	--	--
8	--	--	--
8.02778	--	--	--
8.05556	--	--	--
8.08333	--	--	--
8.11111	--	--	--
8.13889	--	--	--
8.16667	--	--	--
8.19444	--	--	--
8.22222	--	--	--
8.25	--	--	--
8.27778	--	--	--
8.30556	--	--	--
8.33333	--	--	--
8.36111	--	--	--
8.38889	--	--	--
8.41667	--	--	--
8.44444	--	--	--
8.47222	--	--	--
8.5	--	--	--
8.52778	--	--	--
8.55556	--	--	--
8.58333	--	--	--
8.61111	--	--	--
8.63889	--	--	--
8.66667	--	--	--
8.69444	--	--	--
8.72222	--	--	--
8.75	--	--	--
8.77778	--	--	--
8.80556	--	--	--
8.83333	--	--	--
8.86111	--	--	--
8.88889	--	--	--
8.91667	--	--	--
8.94444	--	--	--
8.97222	--	--	--
9	--	--	--
9.02778	--	--	--
9.05556	--	--	--
9.08333	--	--	--
9.11111	--	--	--
9.13889	--	--	--
9.16667	--	--	--
9.19444	--	--	--
9.22222	--	--	--
9.25	--	--	--
9.27778	--	--	--
9.30556	--	--	--
9.33333	--	--	--
9.36111	--	--	--
9.38889	--	--	--
9.41667	--	--	--
9.44444	--	--	--
9.47222	--	--	--
9.5	--	--	--
9.52778	--	--	--
9.55556	--	--	--
9.58333	--	--	--
9.61111	--	--	--
9.63889	--	--	--
9.66667	--	--	--
9.69444	--	--	--
9.72222	--	--	--
9.75	--	--	--
9.77778	--	--	--
9.80556	--	--	--
9.83333	--	--	--
9.86111	--	--	--
9.88889	--	--	--
9.91667	--	--	--
9.94444	--	--	--
9.97222	--	--	--
10	--	--	--
10.0278	--	--	--
10.0556	--	--	--
10.0833	--	--	--
10.1111	--	--	--
10.1389	--	--	--
10.1667	--	--	--
10.1944	--	--	--
10.2222	--	--	--
10.25	--	--	--
10.2778	--	--	--
10.3056	--	--	--
10.3333	--	--	--
10.3611	--	--	--
10.3889	--	--	--
10.4167	--	--	--
10.4444	--	--	--
10.4722	--	--	--
10.5	--	--	--
10.5278	--	--	--
10.5556	--	--	--
10.5833	--	--	--
10.6111	--	--	--
10.6389	--	--	--

## Sheet: Fig5c-2
0.02778	-0.000933	-0.42158	0.02778	-0.000326	-0.48631	0.02778	-0.000938	0.05668	0.02778	0.0036	0.06202	0.02778	0.00514	-1.15131
0.05556	0.000352	-0.4071	0.05556	0.00102	-0.32238	0.05556	-0.00275	-0.07408	0.05556	0.000719	-0.10137	0.05556	0.000948	-1.77457
0.08333	-0.000379	-0.22641	0.08333	0.000801	-0.28755	0.08333	-0.00225	-0.604	0.08333	-0.00283	-0.85311	0.08333	-0.00763	-2.03726
0.11111	0.0014	-0.1439	0.11111	0.00255	-0.29729	0.11111	-0.00133	-0.6718	0.11111	-0.00208	-1.04255	0.11111	-0.01408	-2.20483
0.13889	0.000287	-0.11183	0.13889	0.000736	-0.31065	0.13889	0.000503	-0.69792	0.13889	-0.000797	-1.24258	0.13889	-0.01993	-2.241
0.16667	-2.9e-05	-0.10753	0.16667	-0.00218	-0.31397	0.16667	-0.00301	-0.73191	0.16667	-0.00174	-1.42947	0.16667	-0.01452	-2.20875
0.19444	0.00134	-0.08611	0.19444	0.00161	-0.34191	0.19444	-0.000956	-0.79552	0.19444	-0.00233	-1.62481	0.19444	-0.0178	-2.11825
0.22222	-8e-06	-0.08446	0.22222	0.00103	-0.40828	0.22222	-0.00253	-0.84762	0.22222	-0.00377	-1.78111	0.22222	-0.01804	-1.98173
0.25	0.000198	-0.10239	0.25	-0.00095	-0.45123	0.25	-0.00252	-0.901	0.25	-0.01213	-1.87735	0.25	-0.02049	-1.87348
0.27778	-0.00102	-0.13419	0.27778	-0.00324	-0.49263	0.27778	-0.00285	-0.92663	0.27778	-0.01317	-1.90749	0.27778	-0.01149	-1.78766
0.30556	0.000346	-0.15355	0.30556	-0.000102	-0.51667	0.30556	-0.00528	-1.00123	0.30556	-0.01318	-1.87125	0.30556	-0.01888	-1.72301
0.33333	0.000471	-0.18037	0.33333	0.000463	-0.53058	0.33333	-0.00564	-1.06018	0.33333	-0.01565	-1.82293	0.33333	-0.02183	-1.66248
0.36111	0.000257	-0.19734	0.36111	-0.00148	-0.57742	0.36111	-0.00291	-1.12182	0.36111	-0.00669	-1.76135	0.36111	-0.01591	-1.57775
0.38889	0.000218	-0.20955	0.38889	-0.000804	-0.5934	0.38889	-0.00261	-1.16742	0.38889	-0.01188	-1.70979	0.38889	-0.01341	-1.51695
0.41667	-0.000683	-0.22463	0.41667	-0.000696	-0.59575	0.41667	-0.00476	-1.20355	0.41667	-0.00668	-1.63418	0.41667	-0.01955	-1.49647
0.44444	-0.000443	-0.23787	0.44444	-0.00273	-0.60601	0.44444	-0.00322	-1.23722	0.44444	-0.00749	-1.60605	0.44444	-0.01905	-1.4547
0.47222	-0.000907	-0.23744	0.47222	-0.00244	-0.63213	0.47222	-0.00574	-1.2808	0.47222	-0.01562	-1.55309	0.47222	-0.01533	-1.40239
0.5	-0.0017	-0.24266	0.5	-0.0019	-0.647	0.5	-0.00621	-1.25904	0.5	-0.00855	-1.52435	0.5	-0.01286	-1.41826
0.52778	7.8e-05	-0.24745	0.52778	-0.00269	-0.63985	0.52778	-0.00676	-1.32919	0.52778	-0.00945	-1.46733	0.52778	-0.01904	-1.34359
0.55556	0.000853	-0.25573	0.55556	-0.00221	-0.64751	0.55556	-0.00552	-1.337	0.55556	-0.01062	-1.45262	0.55556	-0.01888	-1.33592
0.58333	-0.000753	-0.25921	0.58333	-0.00178	-0.66439	0.58333	-0.00546	-1.33643	0.58333	-0.01314	-1.4045	0.58333	-0.0101	-1.31568
0.61111	0.00107	-0.264	0.61111	-0.00156	-0.69759	0.61111	-0.00989	-1.38101	0.61111	-0.01236	-1.36882	0.61111	-0.01063	-1.30784
0.63889	-0.000985	-0.2727	0.63889	-0.00211	-0.6955	0.63889	-0.00574	-1.38396	0.63889	-0.01229	-1.38582	0.63889	-0.01523	-1.25681
0.66667	-0.000965	-0.26598	0.66667	-0.00214	-0.70472	0.66667	-0.00933	-1.44681	0.66667	-0.01268	-1.32539	0.66667	-0.0148	-1.27035
0.69444	-0.000468	-0.2775	0.69444	-0.00298	-0.70757	0.69444	-0.00708	-1.45934	0.69444	-0.01344	-1.31045	0.69444	-0.0147	-1.23323
0.72222	-0.00229	-0.27645	0.72222	-0.00277	-0.69573	0.72222	-0.0074	-1.4261	0.72222	-0.01444	-1.29744	0.72222	-0.01582	-1.25242
0.75	0.000186	-0.27095	0.75	-0.00332	-0.7101	0.75	-0.00544	-1.388	0.75	-0.01138	-1.2499	0.75	-0.01879	-1.2088
0.77778	-0.00234	-0.26661	0.77778	-0.00284	-0.72254	0.77778	-0.00806	-1.36928	0.77778	-0.01473	-1.22813	0.77778	-0.01732	-1.2076
0.80556	-0.000853	-0.27845	0.80556	-0.00115	-0.73582	0.80556	-0.00621	-1.3488	0.80556	-0.00869	-1.22573	0.80556	-0.01731	-1.15044
0.83333	0.000731	-0.28113	0.83333	-0.00124	-0.72668	0.83333	-0.00611	-1.35512	0.83333	-0.01295	-1.23419	0.83333	-0.01435	-1.05647
0.86111	-0.00102	-0.28719	0.86111	-0.00241	-0.73713	0.86111	-0.00512	-1.28171	0.86111	-0.01405	-1.17715	0.86111	-0.01496	-0.91227
0.88889	-0.00163	-0.29277	0.88889	-0.000231	-0.74454	0.88889	-0.00554	-1.23032	0.88889	-0.01385	-1.16664	0.88889	-0.02014	-0.77671
0.91667	-0.000679	-0.30308	0.91667	-0.00152	-0.73487	0.91667	-0.00469	-1.26034	0.91667	-0.01064	-1.15869	0.91667	-0.0079	-0.6872
0.94444	-0.00189	-0.29705	0.94444	-0.0026	-0.75965	0.94444	-0.00522	-1.22827	0.94444	-0.013	-1.13352	0.94444	-0.01265	-0.59156
0.97222	-0.000709	-0.29843	0.97222	-0.00329	-0.73583	0.97222	-0.00426	-1.2024	0.97222	-0.01405	-1.06194	0.97222	-0.00718	-0.53078
1	-0.00148	-0.29887	1	-0.00185	-0.75587	1	-0.00269	-1.19806	1	-0.01569	-0.89103	1	-0.01183	-0.47044
1.02778	-0.00192	-0.29191	1.02778	-0.00227	-0.76603	1.02778	-0.00687	-1.206	1.02778	-0.01117	-0.79001	1.02778	-0.01133	-0.42684
1.05556	-0.00144	-0.30887	1.05556	-0.000598	-0.75332	1.05556	-0.00438	-1.15559	1.05556	-0.01361	-0.69139	1.05556	-0.01283	-0.41263
1.08333	-0.000475	-0.30472	1.08333	-0.00326	-0.78198	1.08333	-0.00444	-1.16667	1.08333	-0.00984	-0.60831	1.08333	-0.0015	-0.36674
1.11111	-0.00144	-0.30279	1.11111	-0.000784	-0.77981	1.11111	-0.00595	-1.12226	1.11111	-0.00327	-0.5518	1.11111	-0.00599	-0.33896
1.13889	-0.00194	-0.29016	1.13889	-0.00234	-0.76612	1.13889	-0.00525	-1.12356	1.13889	-0.00638	-0.47445	1.13889	-0.00933	-0.31678
1.16667	-0.00157	-0.30409	1.16667	-0.00369	-0.75848	1.16667	-0.00262	-1.12006	1.16667	-0.00374	-0.41388	1.16667	-0.01421	-0.30389
1.19444	-0.000919	-0.30671	1.19444	-0.00273	-0.76787	1.19444	-0.00392	-1.04042	1.19444	-0.00256	-0.38991	1.19444	-0.01094	-0.27751
1.22222	-0.000673	-0.30539	1.22222	-0.00341	-0.78284	1.22222	-0.00555	-0.96191	1.22222	-0.00524	-0.36117	1.22222	-0.00515	-0.28513
1.25	-0.000802	-0.31716	1.25	-0.00247	-0.77283	1.25	-0.00633	-0.82032	1.25	-0.00299	-0.34195	1.25	-0.00831	-0.26701
1.27778	-0.000559	-0.30192	1.27778	-0.00249	-0.77685	1.27778	-0.00308	-0.71009	1.27778	-0.00417	-0.31586	1.27778	-0.0066	-0.23115
1.30556	-0.000395	-0.32106	1.30556	-0.00139	-0.76298	1.30556	-0.00388	-0.63364	1.30556	-0.00651	-0.30356	1.30556	-0.00786	-0.23875
1.33333	0.000981	-0.325	1.33333	-0.00258	-0.7869	1.33333	-0.0039	-0.57928	1.33333	-0.00492	-0.27086	1.33333	-0.00784	-0.20796
1.36111	-0.000566	-0.32935	1.36111	-0.000791	-0.7625	1.36111	-0.00228	-0.50362	1.36111	-0.000918	-0.27697	1.36111	-0.00385	-0.21096
1.38889	-0.00072	-0.32064	1.38889	-0.00334	-0.77823	1.38889	-0.00164	-0.46475	1.38889	0.00111	-0.2627	1.38889	-0.00295	-0.18615
1.41667	-0.000464	-0.30061	1.41667	-0.00293	-0.81208	1.41667	-0.00303	-0.41703	1.41667	-0.00168	-0.24571	1.41667	-0.01739	-0.18732
1.44444	-0.00111	-0.31759	1.44444	-0.00359	-0.79576	1.44444	-0.00391	-0.37291	1.44444	-0.00435	-0.22573	1.44444	-0.01227	-0.16389
1.47222	-0.00134	-0.31846	1.47222	-0.00177	-0.79068	1.47222	-0.00404	-0.34425	1.47222	-0.00242	-0.20843	1.47222	-0.00576	-0.15873
1.5	-0.000513	-0.30714	1.5	-0.00283	-0.80335	1.5	-0.00109	-0.30365	1.5	-0.00606	-0.21394	1.5	-0.00358	-0.16733
1.52778	0.000628	-0.31498	1.52778	-0.0029	-0.80685	1.52778	-0.000734	-0.29539	1.52778	-0.00541	-0.18036	1.52778	-0.00159	-0.15703
1.55556	-0.00046	-0.3266	1.55556	-0.00256	-0.79987	1.55556	-0.000436	-0.28994	1.55556	-0.00166	-0.17599	1.55556	-0.00505	-0.15206
1.58333	-0.000885	-0.33232	1.58333	-0.00242	-0.80329	1.58333	-0.00269	-0.26531	1.58333	-0.00494	-0.16797	1.58333	-0.0076	-0.132
1.61111	-0.000917	-0.31541	1.61111	-0.00186	-0.81363	1.61111	-0.00103	-0.2566	1.61111	-0.00173	-0.17514	1.61111	0.00343	-0.13287
1.63889	-0.000378	-0.32718	1.63889	-0.00409	-0.80902	1.63889	0.000395	-0.24887	1.63889	0.000577	-0.13915	1.63889	-0.00443	-0.12721
1.66667	0.000335	-0.32324	1.66667	-0.000684	-0.8163	1.66667	0.000205	-0.21949	1.66667	0.000778	-0.1407	1.66667	-0.00216	-0.11632
1.69444	7.7e-05	-0.33823	1.69444	-0.00422	-0.82591	1.69444	8.5e-05	-0.21721	1.69444	0.00119	-0.13853	1.69444	-0.00654	-0.10123
1.72222	0.000781	-0.32549	1.72222	-0.00447	-0.81642	1.72222	-0.00155	-0.20693	1.72222	0.00253	-0.13648	1.72222	-0.00451	-0.11248
1.75	0.00121	-0.3276	1.75	-0.00186	-0.81599	1.75	-0.00488	-0.19082	1.75	-0.00242	-0.13349	1.75	-0.00798	-0.08366
1.77778	-7.2e-05	-0.33415	1.77778	-0.00216	-0.83383	1.77778	-0.00168	-0.176	1.77778	-0.00103	-0.12228	1.77778	0.00512	-0.10052
1.80556	4.8e-05	-0.33175	1.80556	-0.00209	-0.82532	1.80556	-0.000492	-0.1662	1.80556	0.00138	-0.11687	1.80556	-0.00602	-0.08443
1.83333	0.000233	-0.32673	1.83333	-0.0047	-0.85521	1.83333	0.000264	-0.15564	1.83333	0.00377	-0.086	1.83333	-0.00298	-0.08785
1.86111	-0.000258	-0.32396	1.86111	-0.00414	-0.84712	1.86111	-0.00169	-0.15392	1.86111	0.000963	-0.10981	1.86111	0.00166	-0.07885
1.88889	0.00143	-0.32098	1.88889	-0.00427	-0.83733	1.88889	0.000515	-0.13373	1.88889	0.00335	-0.09822	1.88889	0.00266	-0.06839
1.91667	-0.000174	-0.3334	1.91667	-0.0031	-0.85456	1.91667	0.00285	-0.13026	1.91667	0.00357	-0.09148	1.91667	-0.000523	-0.07319
1.94444	-0.000127	-0.32753	1.94444	-0.00388	-0.83991	1.94444	-0.000676	-0.13635	1.94444	0.000591	-0.09366	1.94444	-0.00863	-0.06186
1.97222	0.00113	-0.32195	1.97222	-0.00437	-0.83167	1.97222	0.00166	-0.11807	1.97222	-0.00165	-0.08238	1.97222	0.00392	-0.05751
2	0.00021	-0.32905	2	-0.00197	-0.70859	2	-0.00125	-0.11371	2	0.00389	-0.07641	2	-0.00259	-0.05838
2.02778	0.00186	-0.32641	2.02778	-0.0027	-0.61527	2.02778	-0.000175	-0.11591	2.02778	-0.000101	-0.07231	2.02778	-0.00395	-0.06187
2.05556	0.00195	-0.32412	2.05556	-0.00355	-0.5205	2.05556	-0.00065	-0.09996	2.05556	0.00492	-0.06099	2.05556	0.00145	-0.05228
2.08333	0.00142	-0.32107	2.08333	-0.000978	-0.43273	2.08333	0.00127	-0.09803	2.08333	0.00613	-0.06765	2.08333	-0.00075	-0.05881
2.11111	-0.000431	-0.32193	2.11111	-0.00223	-0.40137	2.11111	0.00242	-0.0917	2.11111	-0.00114	-0.05682	2.11111	-0.00488	-0.05098
2.13889	0.000632	-0.33634	2.13889	-0.00109	-0.34019	2.13889	0.000104	-0.10415	2.13889	-0.000764	-0.06156	2.13889	0.00595	-0.06173
2.16667	0.000595	-0.33044	2.16667	-0.0023	-0.30287	2.16667	0.00212	-0.08687	2.16667	0.00169	-0.05794	2.16667	-0.00524	-0.05044
2.19444	0.000884	-0.32805	2.19444	-0.00287	-0.29533	2.19444	0.00176	-0.071	2.19444	-0.00143	-0.05053	2.19444	-0.00706	0.11076
2.22222	-0.000187	-0.33179	2.22222	-0.00287	-0.26555	2.22222	0.000574	-0.07873	2.22222	0.00426	-0.05665	2.22222	0.00271	1.16782
2.25	-0.000911	-0.3193	2.25	-6.3e-05	-0.22653	2.25	0.00238	-0.07658	2.25	0.00182	-0.05226	2.25	0.01063	2.16628
2.27778	0.000366	-0.33065	2.27778	-0.00335	-0.22243	2.27778	0.000886	-0.07187	2.27778	0.00365	-0.05753	2.27778	0.02124	2.92043
2.30556	0.000555	-0.32803	2.30556	-0.0036	-0.20212	2.30556	0.00209	-0.05447	2.30556	0.00184	-0.04855	2.30556	0.02753	3.52362
2.33333	-0.000837	-0.31848	2.33333	-0.000657	-0.18995	2.33333	-0.000218	-0.07014	2.33333	0.0047	-0.04142	2.33333	0.03488	4.02207
2.36111	-0.000914	-0.33065	2.36111	-0.00207	-0.19169	2.36111	0.00202	-0.0636	2.36111	0.0012	-0.03356	2.36111	0.04662	4.47432
2.38889	-0.00195	-0.32799	2.38889	-0.00222	-0.16958	2.38889	0.00144	-0.05489	2.38889	0.00301	-0.05001	2.38889	0.04729	4.64136
2.41667	-1.1e-05	-0.3279	2.41667	-0.00177	-0.16043	2.41667	-6.7e-05	-0.04946	2.41667	0.00508	-0.01176	2.41667	0.04456	3.99869
2.44444	-0.000975	-0.32193	2.44444	0.000308	-0.15911	2.44444	0.00476	-0.05401	2.44444	0.000912	-0.03626	2.44444	0.03431	3.20632
2.47222	0.0015	-0.33544	2.47222	2.8e-05	-0.15001	2.47222	0.00197	-0.05054	2.47222	0.00204	-0.02406	2.47222	0.03706	2.5216
2.5	0.000652	-0.32108	2.5	-0.000741	-0.13862	2.5	0.00128	-0.04488	2.5	0.000789	-0.04066	2.5	0.03045	1.92625
2.52778	-0.000583	-0.32348	2.52778	-0.00081	-0.11588	2.52778	0.00269	-0.04069	2.52778	-0.00105	-0.02054	2.52778	0.02721	1.56125
2.55556	0.000759	-0.31455	2.55556	-0.00038	-0.11415	2.55556	0.00266	-0.05407	2.55556	0.000837	0.11303	2.55556	0.02481	1.36912
2.58333	-0.00107	-0.32411	2.58333	-0.00168	-0.13244	2.58333	0.00248	-0.01963	2.58333	0.00689	0.66846	2.58333	0.02248	1.45153
2.61111	-0.000417	-0.3176	2.61111	-0.00203	-0.10889	2.61111	0.00416	-0.04259	2.61111	0.00495	1.00367	2.61111	0.02967	1.39789
2.63889	-0.000295	-0.32369	2.63889	-0.000819	-0.10436	2.63889	0.000215	-0.04172	2.63889	0.0086	1.30174	2.63889	0.0288	1.17369
2.66667	-0.000268	-0.31933	2.66667	-0.00113	-0.10718	2.66667	0.00203	-0.02426	2.66667	0.00852	1.51942	2.66667	0.01833	1.05075
2.69444	-0.00127	-0.32533	2.69444	-0.00165	-0.10979	2.69444	0.00196	-0.02564	2.69444	0.01258	1.68868	2.69444	0.01337	0.89788
2.72222	-0.00115	-0.31967	2.72222	0.000434	-0.10274	2.72222	0.00501	-0.0373	2.72222	0.01212	1.85366	2.72222	0.01759	0.8436
2.75	0.000187	-0.32674	2.75	-0.00285	-0.08538	2.75	0.00176	-0.02175	2.75	0.01561	1.97366	2.75	0.00937	0.76967
2.77778	-0.000672	-0.31149	2.77778	-0.00183	-0.07635	2.77778	0.00355	-0.03858	2.77778	0.01362	2.10061	2.77778	0.00584	0.67615
2.80556	-0.000539	-0.32413	2.80556	-0.00103	-0.07983	2.80556	0.000969	-0.02961	2.80556	0.01692	2.14514	2.80556	0.00921	0.62162
2.83333	0.000614	-0.32891	2.83333	0.000205	-0.07448	2.83333	0.00224	-0.03464	2.83333	0.01551	2.15527	2.83333	0.00787	0.59129
2.86111	-0.000755	-0.33065	2.86111	-0.00126	-0.05577	2.86111	0.00116	-0.01266	2.86111	0.01876	2.27677	2.86111	0.00904	0.54009
2.88889	-0.000971	-0.32827	2.88889	-0.000933	-0.07449	2.88889	0.000457	-0.03633	2.88889	0.01903	2.34115	2.88889	0.00917	0.51058
2.91667	-0.00204	-0.3237	2.91667	-0.000617	-0.0513	2.91667	0.000422	-0.01437	2.91667	0.02075	2.3915	2.91667	0.00273	0.47531
2.94444	-0.000594	-0.31323	2.94444	0.00181	-0.06317	2.94444	-0.00125	-0.01349	2.94444	0.02133	2.45755	2.94444	0.00183	0.45577
2.97222	-0.000806	-0.31803	2.97222	-0.00178	-0.06012	2.97222	0.00317	-0.01361	2.97222	0.01652	2.40636	2.97222	0.00256	0.43321
3	-0.00204	-0.32108	3	0.000374	-0.05708	3	-0.000554	-0.03192	3	0.01841	2.39175	3	0.00233	0.42173
3.02778	-0.00124	-0.33685	3.02778	-0.000156	-0.05408	3.02778	0.00193	-0.00609	3.02778	0.01951	2.22977	3.02778	0.00714	0.39057
3.05556	-0.00167	-0.33775	3.05556	-0.0006	-0.05025	3.05556	0.00181	0.09953	3.05556	0.01625	1.91453	3.05556	0.00314	0.35154
3.08333	-0.000966	-0.31847	3.08333	0.000429	-0.04488	3.08333	0.00478	0.27494	3.08333	0.00931	1.63568	3.08333	0.00332	0.32064
3.11111	-0.00185	-0.31933	3.11111	-0.001	-0.04576	3.11111	0.00233	0.45516	3.11111	0.01574	1.52995	3.11111	0.00747	0.32288
3.13889	-0.00138	-0.31018	3.13889	-0.000782	-0.04705	3.13889	0.00515	0.60461	3.13889	0.01643	1.57564	3.13889	0.00602	0.30656
3.16667	0.000182	-0.32499	3.16667	0.000295	-0.04378	3.16667	0.0057	0.72321	3.16667	0.01559	1.39964	3.16667	0.01058	0.28142
3.19444	-0.0014	-0.33565	3.19444	0.000154	-0.02791	3.19444	0.00571	0.82471	3.19444	0.01624	1.20517	3.19444	0.0023	0.25746
3.22222	0.000606	-0.31849	3.22222	-0.000104	-0.04286	3.22222	0.00359	0.90619	3.22222	0.01048	1.06228	3.22222	0.01034	0.22831
3.25	-0.000723	-0.34613	3.25	-0.000565	-0.0135	3.25	0.00314	0.99136	3.25	0.00882	0.972	3.25	-0.000626	0.22741
3.27778	-0.00137	-0.32064	3.27778	-0.00041	-0.03514	3.27778	0.00578	1.0518	3.27778	0.00721	0.83744	3.27778	0.00186	0.22072
3.30556	-0.00141	-0.31933	3.30556	-0.000296	-0.02474	3.30556	0.00906	1.28111	3.30556	0.0102	0.77811	3.30556	0.00401	0.20779
3.33333	0.000636	-0.33937	3.33333	9.3e-05	-0.0392	3.33333	0.00867	1.29999	3.33333	0.0043	0.69443	3.33333	-0.00293	0.18385
3.36111	-0.00234	-0.32896	3.36111	-0.00135	-0.02146	3.36111	0.00783	1.19432	3.36111	0.00641	0.65347	3.36111	-0.00321	0.18732
3.38889	-0.00243	-0.33415	3.38889	-0.000708	-0.02877	3.38889	0.00643	1.13505	3.38889	0.00595	0.58744	3.38889	0.00645	0.17776
3.41667	-0.000929	-0.31792	3.41667	0.00102	-0.02904	3.41667	0.00959	1.15973	3.41667	0.00574	0.50185	3.41667	0.00335	0.17383
3.44444	-0.00138	-0.32532	3.44444	-0.00201	-0.0074	3.44444	0.00842	1.1802	3.44444	0.00132	0.4907	3.44444	0.00825	0.17399
3.47222	0.000684	-0.3237	3.47222	-0.00127	-0.00891	3.47222	0.0101	1.23808	3.47222	9.4e-05	0.46841	3.47222	-0.00235	0.15165
3.5	-0.000566	-0.31933	3.5	-0.000553	-0.04314	3.5	0.01134	1.22357	3.5	0.00634	0.43155	3.5	0.00506	0.1657
3.52778	0.000442	-0.33542	3.52778	-0.000961	-0.00959	3.52778	0.00953	1.22331	3.52778	0.00526	0.41485	3.52778	0.00982	0.16956
3.55556	-0.00148	-0.32352	3.55556	0.000287	-0.01437	3.55556	0.01138	1.22964	3.55556	-0.00176	0.38739	3.55556	0.00532	0.15554
3.58333	-0.0026	-0.33021	3.58333	-0.0016	-0.04424	3.58333	0.00867	1.23244	3.58333	0.000745	0.36813	3.58333	-0.00348	0.16455
3.61111	0.000364	-0.31672	3.61111	-0.00114	-0.00475	3.61111	0.00847	1.24783	3.61111	0.00375	0.33422	3.61111	0.00244	0.16459
3.63889	0.000507	-0.3429	3.63889	-0.00159	-0.02382	3.63889	0.01151	1.27604	3.63889	0.00296	0.33848	3.63889	0.01143	0.15424
3.66667	-6.7e-05	-0.33039	3.66667	-0.0028	-0.03301	3.66667	0.01045	1.27826	3.66667	0.00506	0.29495	3.66667	0.00747	0.15819
3.69444	-0.000405	-0.32631	3.69444	-0.00212	-0.00567	3.69444	0.0109	1.31829	3.69444	-0.00064	0.29124	3.69444	0.00273	0.13093
3.72222	-0.000379	-0.32629	3.72222	0.00105	-0.000871	3.72222	0.0096	1.33787	3.72222	0.00149	0.25964	3.72222	0.00407	0.12631
3.75	-0.00072	-0.33861	3.75	-0.00333	-0.01523	3.75	0.00971	1.40034	3.75	0.00701	0.23134	3.75	0.00521	0.11917
3.77778	-0.0014	-0.32773	3.77778	-0.00116	-0.03065	3.77778	0.00852	1.54234	3.77778	0.00112	0.22779	3.77778	0.000589	0.1176
3.80556	-0.00164	-0.32108	3.80556	-0.00131	-0.01183	3.80556	0.00873	1.49489	3.80556	0.00578	0.1991	3.80556	0.00559	0.1122
3.83333	-0.00067	-0.31802	3.83333	-0.000584	-0.00305	3.83333	0.00923	1.38941	3.83333	0.00264	0.20953	3.83333	-0.001	0.10058
3.86111	-0.000321	-0.32499	3.86111	-0.00127	-0.00087	3.86111	0.00873	1.32899	3.86111	0.00123	0.19245	3.86111	0.00633	0.10049
3.88889	0.00116	-0.33283	3.88889	-0.00203	-0.00392	3.88889	0.00771	1.37405	3.88889	0.00172	0.19813	3.88889	0.00536	0.10718
3.91667	0.000313	-0.31606	3.91667	-0.000577	-0.00261	3.91667	0.00633	1.3974	3.91667	0.00458	0.19082	3.91667	0.00356	0.08986
3.94444	-0.00119	-0.32415	3.94444	0.000682	-0.0257	3.94444	0.0091	1.41497	3.94444	0.002	0.18892	3.94444	0.00512	0.07624
3.97222	0.000713	-0.32525	3.97222	-1.6e-05	0.05189	3.97222	0.00941	1.43575	3.97222	0.000574	0.18155	3.97222	-5.7e-05	0.08356
4	0.000347	-0.33193	4	0.000512	0.13473	4	0.00664	1.42677	4	0.00348	0.185	4	0.004	0.08133
4.02778	2.1e-05	-0.3276	4.02778	0.00169	0.19561	4.02778	0.00864	1.43855	4.02778	0.00292	0.17559	4.02778	0.00578	0.0697
4.05556	-0.000998	-0.32282	4.05556	0.000371	0.26289	4.05556	0.00782	1.38736	4.05556	0.00496	0.17924	4.05556	0.00354	0.06883
4.08333	0.00108	-0.33501	4.08333	-0.00121	0.33165	4.08333	0.00327	1.2136	4.08333	0.00698	0.16774	4.08333	-0.000396	0.06143
4.11111	-0.00122	-0.32381	4.11111	-0.00018	0.38635	4.11111	0.00369	1.0719	4.11111	0.00648	0.16139	4.11111	0.00431	0.06491
4.13889	0.000406	-0.32947	4.13889	0.00217	0.41997	4.13889	0.00508	0.92503	4.13889	0.00491	0.1499	4.13889	0.00614	0.07014
4.16667	-0.000432	-0.34022	4.16667	0.00165	0.45874	4.16667	0.00524	0.79823	4.16667	0.000867	0.13741	4.16667	1.9e-05	0.0575
4.19444	-8.4e-05	-0.33408	4.19444	-0.000167	0.49812	4.19444	0.00465	0.72845	4.19444	0.00326	0.14985	4.19444	0.00318	0.05403
4.22222	-0.00188	-0.33834	4.22222	0.001	0.50622	4.22222	0.00519	0.65545	4.22222	0.00713	0.14551	4.22222	-0.000354	0.05359
4.25	-0.00125	-0.32587	4.25	0.00217	0.53085	4.25	0.00368	0.55331	4.25	0.00341	0.1369	4.25	0.00772	0.05055
4.27778	-0.00127	-0.35354	4.27778	0.00213	0.54676	4.27778	0.00429	0.52735	4.27778	0.000264	0.1248	4.27778	0.0047	0.06142
4.30556	-0.00198	-0.35331	4.30556	0.00115	0.56747	4.30556	0.00165	0.49224	4.30556	0.00551	0.11035	4.30556	0.0028	0.04911
4.33333	-0.00167	-0.33653	4.33333	0.000123	0.60073	4.33333	0.00273	0.44785	4.33333	0.00498	0.10109	4.33333	0.00391	0.04173
4.36111	0.000676	-0.33985	4.36111	0.00192	0.61018	4.36111	-0.00064	0.4003	4.36111	0.00343	0.10133	4.36111	0.00271	0.02225
4.38889	-0.00152	-0.33564	4.38889	0.00249	0.6108	4.38889	0.00248	0.35811	4.38889	0.000177	0.10626	4.38889	1.4e-05	0.06022
4.41667	-0.00281	-0.33196	4.41667	0.000798	0.62255	4.41667	0.00264	0.35017	4.41667	0.000326	0.08693	4.41667	-0.00324	-0.48213
4.44444	-0.000119	-0.31976	4.44444	0.00163	0.64301	4.44444	0.00119	0.35939	4.44444	0.00257	0.1002	4.44444	--	--
4.47222	-0.00217	-0.34819	4.47222	0.00174	0.73845	4.47222	0.00176	0.32499	4.47222	0.0067	0.07757	4.47222	--	--
4.5	-0.000272	-0.34734	4.5	0.0026	0.9217	4.5	0.00039	0.28842	4.5	0.00398	0.09755	4.5	--	--
4.52778	-0.00155	-0.35518	4.52778	0.00378	0.77263	4.52778	-0.00126	0.28624	4.52778	0.00252	0.0771	4.52778	--	--
4.55556	-0.000536	-0.33939	4.55556	0.00228	0.66759	4.55556	0.000965	0.28321	4.55556	0.00545	0.07624	4.55556	--	--
4.58333	-0.000928	-0.33356	4.58333	0.00322	0.69836	4.58333	0.00112	0.25616	4.58333	0.00181	0.08482	4.58333	--	--
4.61111	-8e-06	-0.32935	4.61111	0.00201	0.67832	4.61111	0.00204	0.22395	4.61111	0.00295	0.06832	4.61111	--	--
4.63889	-0.00036	-0.32368	4.63889	0.00363	0.68269	4.63889	0.00101	0.23675	4.63889	0.00681	0.06752	4.63889	--	--
4.66667	-0.00123	-0.33413	4.66667	0.000767	0.66482	4.66667	0.000195	0.21438	4.66667	0.00228	0.05926	4.66667	--	--
4.69444	0.000251	-0.33831	4.69444	0.00349	0.68093	4.69444	0.00332	0.20843	4.69444	0.00477	0.05321	4.69444	--	--
4.72222	0.000279	-0.33804	4.72222	0.00689	0.69399	4.72222	0.00396	0.20256	4.72222	0.00459	0.05112	4.72222	--	--
4.75	-0.000479	-0.34007	4.75	0.0033	0.67441	4.75	0.00225	0.17689	4.75	0.0034	0.06709	4.75	--	--
4.77778	-0.00136	-0.33931	4.77778	0.00367	0.678	4.77778	0.000853	0.18646	4.77778	0.00298	0.05055	4.77778	--	--
4.80556	0.000741	-0.33066	4.80556	0.00161	0.70509	4.80556	0.00162	0.16643	4.80556	0.00361	0.03574	4.80556	--	--
4.83333	-0.000403	-0.33119	4.83333	0.00282	0.69201	4.83333	0.000821	0.17412	4.83333	0.00322	0.05116	4.83333	--	--
4.86111	-0.000637	-0.32033	4.86111	0.00466	0.69777	4.86111	-0.000166	0.17635	4.86111	0.00302	0.04751	4.86111	--	--
4.88889	-0.00163	-0.32629	4.88889	0.00399	0.70887	4.88889	0.00123	0.16296	4.88889	-0.00106	0.04444	4.88889	--	--
4.91667	3.4e-05	-0.33931	4.91667	0.00114	0.69637	4.91667	0.00394	0.16036	4.91667	0.00374	0.03879	4.91667	--	--
4.94444	0.000105	-0.33399	4.94444	0.0022	0.701	4.94444	-0.000253	0.15377	4.94444	0.00232	0.05241	4.94444	--	--
4.97222	-0.000272	-0.32717	4.97222	0.00378	0.70816	4.97222	3.4e-05	0.1577	4.97222	-0.00317	0.0284	4.97222	--	--
5	-0.000689	-0.31977	5	0.0034	0.73929	5	0.00295	0.13745	5	0.00632	0.03714	5	--	--
5.02778	-0.00229	-0.308	5.02778	0.00248	0.71969	5.02778	0.00236	0.1333	5.02778	0.00128	0.03541	5.02778	--	--
5.05556	-0.00143	-0.24134	5.05556	0.00212	0.72062	5.05556	0.00119	0.12852	5.05556	0.00432	-0.1239	5.05556	--	--
5.08333	0.000292	-0.20519	5.08333	0.00367	0.72539	5.08333	0.00151	0.13468	5.08333	--	--	5.08333	--	--
5.11111	0.000676	-0.17645	5.11111	0.0021	0.72223	5.11111	-0.000758	0.1153	5.11111	--	--	5.11111	--	--
5.13889	0.0027	-0.15851	5.13889	0.00399	0.73133	5.13889	-0.000959	0.09115	5.13889	--	--	5.13889	--	--
5.16667	-0.000883	-0.1493	5.16667	0.0019	0.74337	5.16667	-0.00247	0.10815	5.16667	--	--	5.16667	--	--
5.19444	0.000206	-0.1318	5.19444	0.00427	0.72948	5.19444	0.00126	0.10468	5.19444	--	--	5.19444	--	--
5.22222	-0.000564	-0.10794	5.22222	0.00178	0.73928	5.22222	0.00103	0.10071	5.22222	--	--	5.22222	--	--
5.25	-0.000859	-0.10457	5.25	0.00282	0.73184	5.25	0.00107	0.08033	5.25	--	--	5.25	--	--
5.27778	-0.000644	-0.09194	5.27778	0.00452	0.72886	5.27778	0.00294	0.07673	5.27778	--	--	5.27778	--	--
5.30556	0.00173	-0.08827	5.30556	0.00335	0.73627	5.30556	0.000732	0.07798	5.30556	--	--	5.30556	--	--
5.33333	0.00178	-0.0797	5.33333	0.00311	0.78329	5.33333	0.00209	0.08145	5.33333	--	--	5.33333	--	--
5.36111	0.00123	-0.08278	5.36111	0.00332	0.78463	5.36111	0.00213	0.08083	5.36111	--	--	5.36111	--	--
5.38889	0.00127	-0.08189	5.38889	0.00409	0.83522	5.38889	0.00107	0.06491	5.38889	--	--	5.38889	--	--
5.41667	-4.4e-05	-0.08058	5.41667	0.00261	0.92876	5.41667	-0.000596	0.06795	5.41667	--	--	5.41667	--	--
5.44444	-0.000144	-0.0728	5.44444	0.0035	0.78974	5.44444	0.00236	0.06578	5.44444	--	--	5.44444	--	--
5.47222	0.000141	-0.06118	5.47222	0.00425	0.78992	5.47222	0.00117	0.06404	5.47222	--	--	5.47222	--	--
5.5	0.000773	-0.05133	5.5	0.00275	0.79335	5.5	0.000627	0.06056	5.5	--	--	5.5	--	--
5.52778	0.00147	-0.053	5.52778	0.00338	0.76391	5.52778	0.000898	0.05228	5.52778	--	--	5.52778	--	--
5.55556	-0.00133	-0.04443	5.55556	0.00548	0.7831	5.55556	-0.00087	0.05389	5.55556	--	--	5.55556	--	--
5.58333	0.000399	-0.05186	5.58333	0.00261	0.79031	5.58333	0.00162	0.04696	5.58333	--	--	5.58333	--	--
5.61111	0.00199	-0.05924	5.61111	0.00257	0.7655	5.61111	-0.000219	0.04749	5.61111	--	--	5.61111	--	--
5.63889	0.00182	-0.05925	5.63889	0.00519	0.79656	5.63889	-0.00256	0.03752	5.63889	--	--	5.63889	--	--
5.66667	-0.000337	-0.04358	5.66667	0.00459	0.77462	5.66667	0.000336	0.04461	5.66667	--	--	5.66667	--	--
5.69444	0.00129	-0.04012	5.69444	-0.000384	0.79093	5.69444	-0.000298	0.03052	5.69444	--	--	5.69444	--	--
5.72222	0.00039	-0.03502	5.72222	0.00166	0.78416	5.72222	-0.000256	0.04943	5.72222	--	--	5.72222	--	--
5.75	0.00121	-0.04445	5.75	0.00289	0.78486	5.75	0.00155	0.034	5.75	--	--	5.75	--	--
5.77778	0.000846	-0.02351	5.77778	0.00391	0.79552	5.77778	-0.00134	0.02893	5.77778	--	--	5.77778	--	--
5.80556	0.000769	-0.03923	5.80556	0.00255	0.79609	5.80556	-0.00156	0.03969	5.80556	--	--	5.80556	--	--
5.83333	0.00104	-0.02485	5.83333	0.00289	0.79253	5.83333	0.00195	0.02281	5.83333	--	--	5.83333	--	--
5.86111	0.00119	-0.03785	5.86111	0.00244	0.7807	5.86111	-0.001	0.04668	5.86111	--	--	5.86111	--	--
5.88889	0.000801	-0.00609	5.88889	0.00177	0.76219	5.88889	-0.000123	0.01833	5.88889	--	--	5.88889	--	--
5.91667	0.000335	-0.04149	5.91667	0.0027	0.76011	5.91667	0.00139	0.04909	5.91667	--	--	5.91667	--	--
5.94444	0.00126	-0.0184	5.94444	0.00105	0.79084	5.94444	0.00132	0.01213	5.94444	--	--	5.94444	--	--
5.97222	7.6e-05	-0.03326	5.97222	0.00358	0.7616	5.97222	0.00108	0.02252	5.97222	--	--	5.97222	--	--
6	6.3e-05	-0.02881	6	0.00219	0.71169	6	0.00141	0.03222	6	--	--	6	--	--
6.02778	0.00156	-0.00435	6.02778	0.00166	0.61521	6.02778	--	--	6.02778	--	--	6.02778	--	--
6.05556	0.00125	-0.03439	6.05556	0.00271	0.52388	6.05556	--	--	6.05556	--	--	6.05556	--	--
6.08333	0.000821	-0.02506	6.08333	0.00303	0.45134	6.08333	--	--	6.08333	--	--	6.08333	--	--
6.11111	0.00126	-0.00131	6.11111	0.00209	0.40099	6.11111	--	--	6.11111	--	--	6.11111	--	--
6.13889	0.000366	-0.00523	6.13889	0.00328	0.35415	6.13889	--	--	6.13889	--	--	6.13889	--	--
6.16667	0.00125	-0.02487	6.16667	0.00287	0.34241	6.16667	--	--	6.16667	--	--	6.16667	--	--
6.19444	0.000937	-0.02935	6.19444	0.00127	0.30235	6.19444	--	--	6.19444	--	--	6.19444	--	--
6.22222	0.00194	-0.00305	6.22222	0.0033	0.28113	6.22222	--	--	6.22222	--	--	6.22222	--	--
6.25	0.000664	-0.00479	6.25	0.00227	0.25441	6.25	--	--	6.25	--	--	6.25	--	--
6.27778	0.00212	-0.01001	6.27778	0.00164	0.23701	6.27778	--	--	6.27778	--	--	6.27778	--	--
6.30556	-0.000483	-0.01953	6.30556	0.000833	0.23962	6.30556	--	--	6.30556	--	--	6.30556	--	--
6.33333	0.000278	-0.0247	6.33333	0.00166	0.23744	6.33333	--	--	6.33333	--	--	6.33333	--	--
6.36111	-8.9e-05	-0.00261	6.36111	0.0015	0.23332	6.36111	--	--	6.36111	--	--	6.36111	--	--
6.38889	0.00185	-0.00435	6.38889	0.00265	0.21302	6.38889	--	--	6.38889	--	--	6.38889	--	--
6.41667	0.00266	-0.01525	6.41667	0.00198	0.21848	6.41667	--	--	6.41667	--	--	6.41667	--	--
6.44444	0.00129	-0.01938	6.44444	0.000739	0.18646	6.44444	--	--	6.44444	--	--	6.44444	--	--
6.47222	0.00103	-0.01787	6.47222	0.00216	0.17949	6.47222	--	--	6.47222	--	--	6.47222	--	--
6.5	0.00229	-0.00522	6.5	0.000592	0.16813	6.5	--	--	6.5	--	--	6.5	--	--
6.52778	-5.5e-05	-0.00262	6.52778	0.00168	0.17233	6.52778	--	--	6.52778	--	--	6.52778	--	--
6.55556	0.000396	-0.01349	6.55556	0.0026	0.18255	6.55556	--	--	6.55556	--	--	6.55556	--	--
6.58333	0.000651	-0.03441	6.58333	0.00031	0.15959	6.58333	--	--	6.58333	--	--	6.58333	--	--
6.61111	0.00362	-0.00162	6.61111	0.000768	0.13678	6.61111	--	--	6.61111	--	--	6.61111	--	--
6.63889	0.000863	-0.00863	6.63889	0.00159	0.12851	6.63889	--	--	6.63889	--	--	6.63889	--	--
6.66667	0.00209	-0.00218	6.66667	0.00205	0.12983	6.66667	--	--	6.66667	--	--	6.66667	--	--
6.69444	0.00148	0	6.69444	0.000384	0.12023	6.69444	--	--	6.69444	--	--	6.69444	--	--
6.72222	0.00244	-0.000871	6.72222	0.00053	0.11763	6.72222	--	--	6.72222	--	--	6.72222	--	--
6.75	0.002	-0.00149	6.75	5.2e-05	0.09761	6.75	--	--	6.75	--	--	6.75	--	--
6.77778	0.00123	-0.00876	6.77778	0.0015	0.10957	6.77778	--	--	6.77778	--	--	6.77778	--	--
6.80556	0.00299	-0.01218	6.80556	0.000143	0.11021	6.80556	--	--	6.80556	--	--	6.80556	--	--
6.83333	0.00073	-0.01611	6.83333	-0.000398	0.08386	6.83333	--	--	6.83333	--	--	6.83333	--	--
6.86111	0.00239	-0.01219	6.86111	-0.000666	0.09717	6.86111	--	--	6.86111	--	--	6.86111	--	--
6.88889	0.000946	-0.00479	6.88889	0.000903	0.07729	6.88889	--	--	6.88889	--	--	6.88889	--	--
6.91667	0.00158	0.01917	6.91667	0.000638	0.07362	6.91667	--	--	6.91667	--	--	6.91667	--	--
6.94444	-0.00082	-0.01395	6.94444	-0.000303	0.087	6.94444	--	--	6.94444	--	--	6.94444	--	--
6.97222	0.00106	-0.00653	6.97222	0.00254	0.08311	6.97222	--	--	6.97222	--	--	6.97222	--	--
7	0.00146	0.0564	7	0.00188	0.07362	7	--	--	7	--	--	7	--	--
7.02778	0.000985	0.0855	7.02778	-0.000189	0.06882	7.02778	--	--	7.02778	--	--	7.02778	--	--
7.05556	0.00149	0.07971	7.05556	-0.000199	0.07101	7.05556	--	--	7.05556	--	--	7.05556	--	--
7.08333	0.0011	0.11189	7.08333	-5.7e-05	0.06622	7.08333	--	--	7.08333	--	--	7.08333	--	--
7.11111	0.000639	0.12068	7.11111	3.2e-05	0.05403	7.11111	--	--	7.11111	--	--	7.11111	--	--
7.13889	0.000853	0.1372	7.13889	0.00127	0.06839	7.13889	--	--	7.13889	--	--	7.13889	--	--
7.16667	-2.4e-05	0.16251	7.16667	-0.000778	0.06491	7.16667	--	--	7.16667	--	--	7.16667	--	--
7.19444	0.00193	0.18081	7.19444	0.000734	0.05054	7.19444	--	--	7.19444	--	--	7.19444	--	--
7.22222	0.00237	0.19299	7.22222	-0.000156	0.03487	7.22222	--	--	7.22222	--	--	7.22222	--	--
7.25	0.00315	0.20127	7.25	0.00127	0.04896	7.25	--	--	7.25	--	--	7.25	--	--
7.27778	0.00166	0.21286	7.27778	0.00149	0.00914	7.27778	--	--	7.27778	--	--	7.27778	--	--
7.30556	0.00235	0.22343	7.30556	0.0013	0.05126	7.30556	--	--	7.30556	--	--	7.30556	--	--
7.33333	0.00117	0.22117	7.33333	0.000856	0.02169	7.33333	--	--	7.33333	--	--	7.33333	--	--
7.36111	-0.00044	0.23123	7.36111	-7.8e-05	0.04476	7.36111	--	--	7.36111	--	--	7.36111	--	--
7.38889	0.00161	0.23602	7.38889	-0.00161	0.05011	7.38889	--	--	7.38889	--	--	7.38889	--	--
7.41667	0.00158	0.2444	7.41667	0.000114	0.01533	7.41667	--	--	7.41667	--	--	7.41667	--	--
7.44444	0.00117	0.25094	7.44444	0.00138	0.05329	7.44444	--	--	7.44444	--	--	7.44444	--	--
7.47222	0.00181	0.25137	7.47222	-0.00145	0.03268	7.47222	--	--	7.47222	--	--	7.47222	--	--
7.5	0.00206	0.26094	7.5	0.00237	0.03685	7.5	--	--	7.5	--	--	7.5	--	--
7.52778	-7e-06	0.25684	7.52778	-0.000691	0.01698	7.52778	--	--	7.52778	--	--	7.52778	--	--
7.55556	0.00235	0.26531	7.55556	0.0015	0.04072	7.55556	--	--	7.55556	--	--	7.55556	--	--
7.58333	0.00182	0.26358	7.58333	-0.000945	0.00566	7.58333	--	--	7.58333	--	--	7.58333	--	--
7.61111	0.00194	0.27449	7.61111	0.00114	0.01002	7.61111	--	--	7.61111	--	--	7.61111	--	--
7.63889	0.00204	0.2742	7.63889	0.00112	0.04405	7.63889	--	--	7.63889	--	--	7.63889	--	--
7.66667	-9.1e-05	0.26661	7.66667	0.000507	0.01541	7.66667	--	--	7.66667	--	--	7.66667	--	--
7.69444	0.000646	0.28391	7.69444	0.000506	0.05148	7.69444	--	--	7.69444	--	--	7.69444	--	--
7.72222	0.000449	0.28014	7.72222	0.00197	0.00579	7.72222	--	--	7.72222	--	--	7.72222	--	--
7.75	0.00167	0.28633	7.75	0.000692	0.03671	7.75	--	--	7.75	--	--	7.75	--	--
7.77778	0.00219	0.28752	7.77778	0.00121	0.02317	7.77778	--	--	7.77778	--	--	7.77778	--	--
7.80556	0.0011	0.27787	7.80556	0.00149	0.00147	7.80556	--	--	7.80556	--	--	7.80556	--	--
7.83333	0.00276	0.29171	7.83333	0.00103	0.02185	7.83333	--	--	7.83333	--	--	7.83333	--	--
7.86111	0.00241	0.29664	7.86111	0.000808	0.01784	7.86111	--	--	7.86111	--	--	7.86111	--	--
7.88889	0.00103	0.29321	7.88889	0.00175	0.0209	7.88889	--	--	7.88889	--	--	7.88889	--	--
7.91667	0.0016	0.30497	7.91667	0.000492	1e-06	7.91667	--	--	7.91667	--	--	7.91667	--	--
7.94444	0.0016	0.30714	7.94444	0.000107	0.00174	7.94444	--	--	7.94444	--	--	7.94444	--	--
7.97222	0.0032	0.30715	7.97222	0.000635	0.02804	7.97222	--	--	7.97222	--	--	7.97222	--	--
8	0.00347	0.31672	8	--	--	8	--	--	8	--	--	8	--	--
8.02778	0.00226	0.31759	8.02778	--	--	8.02778	--	--	8.02778	--	--	8.02778	--	--
8.05556	0.000598	0.30409	8.05556	--	--	8.05556	--	--	8.05556	--	--	8.05556	--	--
8.08333	0.00221	0.31324	8.08333	--	--	8.08333	--	--	8.08333	--	--	8.08333	--	--
8.11111	0.00181	0.30845	8.11111	--	--	8.11111	--	--	8.11111	--	--	8.11111	--	--
8.13889	0.00322	0.30235	8.13889	--	--	8.13889	--	--	8.13889	--	--	8.13889	--	--
8.16667	0.0011	0.31846	8.16667	--	--	8.16667	--	--	8.16667	--	--	8.16667	--	--
8.19444	0.0025	0.30888	8.19444	--	--	8.19444	--	--	8.19444	--	--	8.19444	--	--
8.22222	-0.000323	0.32238	8.22222	--	--	8.22222	--	--	8.22222	--	--	8.22222	--	--
8.25	0.00409	0.41074	8.25	--	--	8.25	--	--	8.25	--	--	8.25	--	--
8.27778	0.0012	0.53237	8.27778	--	--	8.27778	--	--	8.27778	--	--	8.27778	--	--
8.30556	0.00265	0.37464	8.30556	--	--	8.30556	--	--	8.30556	--	--	8.30556	--	--
8.33333	0.000947	0.29496	8.33333	--	--	8.33333	--	--	8.33333	--	--	8.33333	--	--
8.36111	0.00041	0.29886	8.36111	--	--	8.36111	--	--	8.36111	--	--	8.36111	--	--
8.38889	0.000868	0.28574	8.38889	--	--	8.38889	--	--	8.38889	--	--	8.38889	--	--
8.41667	0.000519	0.27053	8.41667	--	--	8.41667	--	--	8.41667	--	--	8.41667	--	--
8.44444	0.000461	0.27804	8.44444	--	--	8.44444	--	--	8.44444	--	--	8.44444	--	--
8.47222	0.000832	0.28668	8.47222	--	--	8.47222	--	--	8.47222	--	--	8.47222	--	--
8.5	0.00224	0.2983	8.5	--	--	8.5	--	--	8.5	--	--	8.5	--	--
8.52778	0.000287	0.30704	8.52778	--	--	8.52778	--	--	8.52778	--	--	8.52778	--	--
8.55556	0.00118	0.31063	8.55556	--	--	8.55556	--	--	8.55556	--	--	8.55556	--	--
8.58333	0.00144	0.30018	8.58333	--	--	8.58333	--	--	8.58333	--	--	8.58333	--	--
8.61111	-0.000394	0.31454	8.61111	--	--	8.61111	--	--	8.61111	--	--	8.61111	--	--
8.63889	0.00141	0.31236	8.63889	--	--	8.63889	--	--	8.63889	--	--	8.63889	--	--
8.66667	0.00148	0.31324	8.66667	--	--	8.66667	--	--	8.66667	--	--	8.66667	--	--
8.69444	0.000428	0.31106	8.69444	--	--	8.69444	--	--	8.69444	--	--	8.69444	--	--
8.72222	-0.000409	0.31106	8.72222	--	--	8.72222	--	--	8.72222	--	--	8.72222	--	--
8.75	0.000839	0.29626	8.75	--	--	8.75	--	--	8.75	--	--	8.75	--	--
8.77778	0.00103	0.32194	8.77778	--	--	8.77778	--	--	8.77778	--	--	8.77778	--	--
8.80556	0.00289	0.31846	8.80556	--	--	8.80556	--	--	8.80556	--	--	8.80556	--	--
8.83333	0.000311	0.30758	8.83333	--	--	8.83333	--	--	8.83333	--	--	8.83333	--	--
8.86111	0.000101	0.30061	8.86111	--	--	8.86111	--	--	8.86111	--	--	8.86111	--	--
8.88889	-0.0001	0.30285	8.88889	--	--	8.88889	--	--	8.88889	--	--	8.88889	--	--
8.91667	0.00171	0.29944	8.91667	--	--	8.91667	--	--	8.91667	--	--	8.91667	--	--
8.94444	0.00148	0.32323	8.94444	--	--	8.94444	--	--	8.94444	--	--	8.94444	--	--
8.97222	0.00216	0.32526	8.97222	--	--	8.97222	--	--	8.97222	--	--	8.97222	--	--
9	0.000761	0.32107	9	--	--	9	--	--	9	--	--	9	--	--
9.02778	0.001	0.31194	9.02778	--	--	9.02778	--	--	9.02778	--	--	9.02778	--	--
9.05556	1.4e-05	0.30017	9.05556	--	--	9.05556	--	--	9.05556	--	--	9.05556	--	--
9.08333	0.00266	0.31497	9.08333	--	--	9.08333	--	--	9.08333	--	--	9.08333	--	--
9.11111	-0.000107	0.31411	9.11111	--	--	9.11111	--	--	9.11111	--	--	9.11111	--	--
9.13889	0.00109	0.3102	9.13889	--	--	9.13889	--	--	9.13889	--	--	9.13889	--	--
9.16667	0.000784	0.31018	9.16667	--	--	9.16667	--	--	9.16667	--	--	9.16667	--	--
9.19444	0.00132	0.3068	9.19444	--	--	9.19444	--	--	9.19444	--	--	9.19444	--	--
9.22222	0.00195	0.31566	9.22222	--	--	9.22222	--	--	9.22222	--	--	9.22222	--	--
9.25	0.00184	0.31333	9.25	--	--	9.25	--	--	9.25	--	--	9.25	--	--
9.27778	0.000961	0.31498	9.27778	--	--	9.27778	--	--	9.27778	--	--	9.27778	--	--
9.30556	0.000626	0.31672	9.30556	--	--	9.30556	--	--	9.30556	--	--	9.30556	--	--
9.33333	0.00168	0.31847	9.33333	--	--	9.33333	--	--	9.33333	--	--	9.33333	--	--
9.36111	-2.1e-05	0.325	9.36111	--	--	9.36111	--	--	9.36111	--	--	9.36111	--	--
9.38889	0.00148	0.29974	9.38889	--	--	9.38889	--	--	9.38889	--	--	9.38889	--	--
9.41667	0.00138	0.33065	9.41667	--	--	9.41667	--	--	9.41667	--	--	9.41667	--	--
9.44444	0.00151	0.30279	9.44444	--	--	9.44444	--	--	9.44444	--	--	9.44444	--	--
9.47222	0.000291	0.31019	9.47222	--	--	9.47222	--	--	9.47222	--	--	9.47222	--	--
9.5	0.000827	0.32412	9.5	--	--	9.5	--	--	9.5	--	--	9.5	--	--
9.52778	0.00291	0.32336	9.52778	--	--	9.52778	--	--	9.52778	--	--	9.52778	--	--
9.55556	0.00407	0.33165	9.55556	--	--	9.55556	--	--	9.55556	--	--	9.55556	--	--
9.58333	0.00137	0.32412	9.58333	--	--	9.58333	--	--	9.58333	--	--	9.58333	--	--
9.61111	0.00275	0.32021	9.61111	--	--	9.61111	--	--	9.61111	--	--	9.61111	--	--
9.63889	0.00116	0.31802	9.63889	--	--	9.63889	--	--	9.63889	--	--	9.63889	--	--
9.66667	0.00285	0.31019	9.66667	--	--	9.66667	--	--	9.66667	--	--	9.66667	--	--
9.69444	0.00201	0.33739	9.69444	--	--	9.69444	--	--	9.69444	--	--	9.69444	--	--
9.72222	0.00121	0.35593	9.72222	--	--	9.72222	--	--	9.72222	--	--	9.72222	--	--
9.75	0.00048	0.35964	9.75	--	--	9.75	--	--	9.75	--	--	9.75	--	--
9.77778	0.00342	0.33412	9.77778	--	--	9.77778	--	--	9.77778	--	--	9.77778	--	--
9.80556	0.00243	0.32847	9.80556	--	--	9.80556	--	--	9.80556	--	--	9.80556	--	--
9.83333	0.000972	0.32021	9.83333	--	--	9.83333	--	--	9.83333	--	--	9.83333	--	--
9.86111	0.000327	0.32792	9.86111	--	--	9.86111	--	--	9.86111	--	--	9.86111	--	--
9.88889	0.00214	0.31621	9.88889	--	--	9.88889	--	--	9.88889	--	--	9.88889	--	--
9.91667	0.00193	0.32673	9.91667	--	--	9.91667	--	--	9.91667	--	--	9.91667	--	--
9.94444	0.00146	0.32209	9.94444	--	--	9.94444	--	--	9.94444	--	--	9.94444	--	--
9.97222	0.00229	0.31948	9.97222	--	--	9.97222	--	--	9.97222	--	--	9.97222	--	--
10	0.000385	0.31165	10	--	--	10	--	--	10	--	--	10	--	--
10.0278	0.0013	0.30668	10.0278	--	--	10.0278	--	--	10.0278	--	--	10.0278	--	--
10.0556	0.00269	0.35878	10.0556	--	--	10.0556	--	--	10.0556	--	--	10.0556	--	--
10.0833	-4.4e-05	0.32238	10.0833	--	--	10.0833	--	--	10.0833	--	--	10.0833	--	--
10.1111	0.0013	0.29103	10.1111	--	--	10.1111	--	--	10.1111	--	--	10.1111	--	--
10.1389	0.00225	0.29578	10.1389	--	--	10.1389	--	--	10.1389	--	--	10.1389	--	--
10.1667	5.1e-05	0.28866	10.1667	--	--	10.1667	--	--	10.1667	--	--	10.1667	--	--
10.1944	0.000727	0.30061	10.1944	--	--	10.1944	--	--	10.1944	--	--	10.1944	--	--
10.2222	0.00192	0.30192	10.2222	--	--	10.2222	--	--	10.2222	--	--	10.2222	--	--
10.25	0.0015	0.31281	10.25	--	--	10.25	--	--	10.25	--	--	10.25	--	--
10.2778	-5.2e-05	0.30757	10.2778	--	--	10.2778	--	--	10.2778	--	--	10.2778	--	--
10.3056	0.00209	0.3115	10.3056	--	--	10.3056	--	--	10.3056	--	--	10.3056	--	--
10.3333	0.00168	0.32237	10.3333	--	--	10.3333	--	--	10.3333	--	--	10.3333	--	--
10.3611	0.00312	0.32718	10.3611	--	--	10.3611	--	--	10.3611	--	--	10.3611	--	--
10.3889	0.000715	0.33237	10.3889	--	--	10.3889	--	--	10.3889	--	--	10.3889	--	--
10.4167	0.000495	0.33744	10.4167	--	--	10.4167	--	--	10.4167	--	--	10.4167	--	--
10.4444	0.00227	0.32194	10.4444	--	--	10.4444	--	--	10.4444	--	--	10.4444	--	--
10.4722	-0.00121	0.33656	10.4722	--	--	10.4722	--	--	10.4722	--	--	10.4722	--	--
10.5	0.0017	0.31933	10.5	--	--	10.5	--	--	10.5	--	--	10.5	--	--
10.5278	0.00179	0.31759	10.5278	--	--	10.5278	--	--	10.5278	--	--	10.5278	--	--
10.5556	0.00286	0.4184	10.5556	--	--	10.5556	--	--	10.5556	--	--	10.5556	--	--
10.5833	0.00171	0.40777	10.5833	--	--	10.5833	--	--	10.5833	--	--	10.5833	--	--
10.6111	0.00168	0.35689	10.6111	--	--	10.6111	--	--	10.6111	--	--	10.6111	--	--
10.6389	0.00132	0.33817	10.6389	--	--	10.6389	--	--	10.6389	--	--	10.6389	--	--
10.6667	0.00102	0.31106
10.6944	0.000304	0.31019
10.7222	-0.00204	0.31149
10.75	-0.000354	0.31846
10.7778	0.00188	0.31802
10.8056	0.00163	0.3141
10.8333	0.0019	0.32326
10.8611	0.000417	0.32457
10.8889	0.00214	0.31351
10.9167	-0.0013	0.30353
10.9444	0.00104	0.31135
10.9722	0.000992	0.32064
11	-8.7e-05	0.31584
11.0278	0.00104	0.31295
11.0556	0.00222	0.31121
11.0833	2.8e-05	0.31077
11.1111	0.00034	0.31277
11.1389	-0.000216	0.32307
11.1667	0.00185	0.30496
11.1944	0.00126	0.35703
11.2222	0.000727	0.36591
11.25	0.000464	0.35574
11.2778	0.000138	0.34985
11.3056	0.000761	0.33386
11.3333	0.00238	0.32281
11.3611	-0.000327	0.31585
11.3889	0.000508	0.325
11.4167	0.000906	0.31889
11.4444	0.000926	0.32064
11.4722	0.000209	0.31582
11.5	0.00103	0.33745
11.5278	0.00023	0.33544
11.5556	0.000215	0.33196
11.5833	0.000909	0.3346
11.6111	0.00144	0.32824
11.6389	0.000843	0.31759
11.6667	0.000822	0.31584
11.6944	0.000471	0.32467
11.7222	0.000523	0.32174
11.75	0.000404	0.31739
11.7778	0.00107	0.31987
11.8056	5.9e-05	0.30653
11.8333	0.00183	0.31357
11.8611	0.000638	0.3209
11.8889	0.000822	0.32892
11.9167	0.0015	0.33915
11.9444	0.000395	0.32758
11.9722	0.00141	0.3181
12	0.000527	0.32452
12.0278	0.000559	0.29726
12.0556	-9e-05	0.2505
12.0833	0.000706	0.2101
12.1111	0.00177	0.20431
12.1389	0.00121	0.18342
12.1667	0.000827	0.16251
12.1944	-0.000658	0.15821
12.2222	0.000823	0.13374
12.25	0.00107	0.11458
12.2778	0.000127	0.11348
12.3056	0.000753	0.10021
12.3333	9.7e-05	0.10082
12.3611	0.00304	0.09937
12.3889	0.000945	0.11546
12.4167	-3.7e-05	0.10152
12.4444	0.00022	0.0964
12.4722	0.000924	0.07448
12.5	0.00182	0.06143
12.5278	0.000409	0.04923
12.5556	0.00156	0.05447
12.5833	0.000403	0.07274
12.6111	0.001	0.08231
12.6389	0.00137	0.08302
12.6667	0.00166	0.06359
12.6944	-2e-05	0.0529
12.7222	-0.00131	0.04491
12.75	-0.000275	0.03922
12.7778	0.0016	0.04139
12.8056	0.00182	0.05676
12.8333	-0.000422	0.03669
12.8611	-0.000578	0.03103
12.8889	0.000168	0.02889
12.9167	0.0018	0.03709
12.9444	0.000519	0.04765
12.9722	0.000663	0.04314
13	-0.00042	0.05794
13.0278	0.000127	0.05185
13.0556	0.000679	0.04463
13.0833	-0.000216	0.02002
13.1111	-0.000587	0.03861
13.1389	0.000162	0.00517
13.1667	-0.000885	0.02308
13.1944	0.000794	0.02755
13.2222	0.0012	0.00666
13.25	0.000385	0.00435
13.2778	0.00187	0.01997
13.3056	-0.000398	0.04122
13.3333	-0.000106	0.01473
13.3611	-0.00104	0.03328
13.3889	0.00167	0.01537
13.4167	-0.000663	0.000873
13.4444	-0.000113	0.00235
13.4722	0.000461	0.01922
13.5	-0.000121	0.03157
13.5278	-0.000739	0.00739
13.5556	0.000505	0.00197
13.5833	0.000441	0.00353
13.6111	0.00098	0.02327
13.6389	0.000294	0.02003
13.6667	0.000208	0.01567
13.6944	0.00108	0.00174
13.7222	0.000655	0.0122
13.75	-0.000336	0.01827
13.7778	0.00131	0.02085
13.8056	0.00166	0.009
13.8333	0.000767	0.00171
13.8611	0.000735	0.00789
13.8889	0.00191	0.0322
13.9167	-0.00118	0.01983
13.9444	0.000229	0.00131
13.9722	-3e-06	0
14	4.7e-05	-0.000436
14.0278	0.000487	-0.00218
14.0556	-0.000126	-0.00218
14.0833	0.000503	0.00174
14.1111	0.00013	0.00261
14.1389	-0.000516	0.000438
14.1667	-0.00183	0
14.1944	0.000219	0.000441
14.2222	0	-4e-06
14.25	-0.000267	0.00522
14.2778	-0.000323	0.03331
14.3056	0.00204	0.02352
14.3333	-0.00041	0
14.3611	0.000126	0
14.3889	0.00218	0.000437
14.4167	0.00128	0.00217
14.4444	3e-06	0.000763
14.4722	0.000838	0.0098
14.5	0.000294	-0.0123
14.5278	-5.1e-05	-0.000871
14.5556	-3.1e-05	0

## Sheet: Fig5d
0	0.00248	0	0.00108	0	-0.0039	0	-0.01664	0	-0.03337
0.13982	0.00366	0.05593	-0.000727	0.02796	0.0088	0.01398	-0.02481	0.00559	-0.03369
0.27964	0.000488	0.11186	-0.00448	0.05593	0.01916	0.02796	-0.01884	0.01119	-0.0282
0.41946	0.01121	0.16778	-0.00183	0.08389	0.03521	0.04195	-0.0122	0.01678	-0.0095
0.55928	0.01212	0.22371	7e-05	0.11186	0.03886	0.05593	0.00921	0.02237	0.01158
0.6991	0.0096	0.27964	0.00505	0.13982	0.04092	0.06991	0.01206	0.02796	0.02462
0.83893	0.01089	0.33557	0.00698	0.16778	0.03705	0.08389	0.01713	0.03356	0.03222
0.97875	0.00776	0.3915	0.01024	0.19575	0.042	0.09788	0.02447	0.03915	0.04755
1.11857	0.0084	0.44743	0.01079	0.22371	0.04795	0.11186	0.03432	0.04474	0.06371
1.25839	0.00697	0.50336	0.00929	0.25168	0.05141	0.12584	0.0356	0.05034	0.07452
1.39821	0.00542	0.55928	0.01243	0.27964	0.04916	0.13982	0.02478	0.05593	0.08021
1.53803	0.00681	0.61521	0.01314	0.30761	0.0503	0.1538	0.02209	0.06152	0.08435
1.67785	0.00596	0.67114	0.01828	0.33557	0.0591	0.16778	0.02819	0.06711	0.09192
1.81767	0.00552	0.72707	0.01589	0.36354	0.06184	0.18177	0.04122	0.07271	0.09303
1.95749	0.00646	0.783	0.01906	0.3915	0.06629	0.19575	0.04589	0.0783	0.10405
2.09732	0.00843	0.83893	0.02009	0.41946	0.06462	0.20973	0.04599	0.08389	0.11346
2.23714	0.008	0.89485	0.02144	0.44743	0.06912	0.22371	0.05749	0.08948	0.12157
2.37696	0.00665	0.95078	0.01604	0.47539	0.06172	0.2377	0.06145	0.09508	0.12316
2.51678	0.00728	1.00671	0.01455	0.50336	0.05492	0.25168	0.06764	0.10067	0.13025
2.6566	0.00666	1.06264	0.0172	0.53132	0.05354	0.26566	0.06393	0.10626	0.13282
2.79642	0.0063	1.11857	0.0184	0.55928	0.05737	0.27964	0.07752	0.11186	0.13609
2.93624	0.00784	1.1745	0.01888	0.58725	0.06551	0.29362	0.08193	0.11745	0.14003
3.07606	0.00424	1.23043	0.0194	0.61521	0.06711	0.30761	0.0866	0.12304	0.13846
3.21588	0.00998	1.28635	0.02371	0.64318	0.07105	0.32159	0.08011	0.12864	0.14424
3.3557	0.00844	1.34228	0.02644	0.67114	0.0731	0.33557	0.08559	0.13423	0.15786
3.49553	0.00986	1.39821	0.0277	0.6991	0.07405	0.34955	0.09301	0.13982	0.17699
3.63535	0.0091	1.45414	0.02854	0.72707	0.07038	0.36354	0.09532	0.14541	0.17947
3.77517	0.01031	1.51007	0.02963	0.75503	0.06776	0.37752	0.10213	0.15101	0.18659
3.91499	0.01048	1.566	0.03013	0.783	0.07063	0.3915	0.10309	0.1566	0.18996
4.05481	0.0107	1.62192	0.03263	0.81096	0.06805	0.40548	0.11107	0.16219	0.19603
4.19463	0.00927	1.67785	0.03285	0.83893	0.07093	0.41946	0.11082	0.16778	0.19687
		1.73378	0.03628	0.86689	0.06689	0.43345	0.11638	0.17338	0.19751
		1.78971	0.03737	0.89485	0.06853	0.44743	0.11776	0.17897	0.19976
		1.84564	0.03894	0.92282	0.06523	0.46141	0.11615	0.18456	0.20625
		1.90157	0.03685	0.95078	0.05941	0.47539	0.1134	0.19016	0.21738
		1.95749	0.03677	0.97875	0.05869	0.48937	0.11294	0.19575	0.23052
		2.01342	0.03948	1.00671	0.05233	0.50336	0.11488	0.20134	0.24428
		2.06935	0.04384	1.03468	0.06036	0.51734	0.10845	0.20694	0.24712
		2.12528	0.04623	1.06264	0.05789	0.53132	0.1043	0.21253	0.25695
		2.18121	0.04176	1.0906	0.0552	0.5453	0.10124	0.21812	0.25786
		2.23714	0.04106	1.11857	0.05665	0.55928	0.1083	0.22371	0.2742
		2.29306	0.0411	1.14653	0.06179	0.57327	0.11494	0.22931	0.27545
		2.34899	0.04581	1.1745	0.07331	0.58725	0.11657	0.2349	0.28817
		2.40492	0.04527	1.20246	0.06482	0.60123	0.11032	0.24049	0.29677
		2.46085	0.04412	1.23043	0.05964	0.61521	0.11099	0.24609	0.31225
		2.51678	0.04462	1.25839	0.06167	0.62919	0.11277	0.25168	0.32199
		2.57271	0.04621	1.28635	0.06223	0.64318	0.11683	0.25727	0.3349
		2.62864	0.04876	1.31432	0.06395	0.65716	0.11409	0.26286	0.33362
		2.68456	0.04594	1.34228	0.06339	0.67114	0.10919	0.26846	0.32673
		2.74049	0.04409	1.37025	0.0653	0.68512	0.10527	0.27405	0.32655
		2.79642	0.04413	1.39821	0.06467	0.6991	0.10093	0.27964	0.31847
		2.85235	0.0457	1.42617	0.0717	0.71309	0.09734	0.28524	0.31697
		2.90828	0.04507	1.45414	0.07304	0.72707	0.09644	0.29083	0.30911
		2.96421	0.04008	1.4821	0.0848	0.74105	0.09567	0.29642	0.30267
		3.02013	0.03603	1.51007	0.08024	0.75503	0.10181	0.30201	0.29809
		3.07606	0.03536	1.53803	0.07695	0.76902	0.10606	0.30761	0.29765
		3.13199	0.03723	1.566	0.06929	0.783	0.1092	0.3132	0.30145
		3.18792	0.0381	1.59396	0.06039	0.79698	0.1034	0.31879	0.29507
		3.24385	0.03635	1.62192	0.06672	0.81096	0.10019	0.32438	0.27237
		3.29978	0.03278	1.64989	0.06482	0.82494	0.09402	0.32998	0.25535
		3.3557	0.03371	1.67785	0.0635	0.83893	0.10263	0.33557	0.23875
		3.41163	0.03437	1.70582	0.05054	0.85291	0.10009	0.34116	0.22834
		3.46756	0.03536	1.73378	0.0536	0.86689	0.11519	0.34676	0.22286
		3.52349	0.03394	1.76174	0.05434	0.88087	0.11286	0.35235	0.20895
		3.57942	0.03281	1.78971	0.06337	0.89485	0.114	0.35794	0.20002
		3.63535	0.03473	1.81767	0.05332	0.90884	0.10421	0.36354	0.18905
		3.69128	0.03773	1.84564	0.05728	0.92282	0.09705	0.36913	0.182
		3.7472	0.03578	1.8736	0.0545	0.9368	0.11146	0.37472	0.16742
		3.80313	0.03575	1.90157	0.05383	0.95078	0.11389	0.38031	0.1523
		3.85906	0.03007	1.92953	0.04748	0.96476	0.11815	0.38591	0.13625
		3.91499	0.0335	1.95749	0.04833	0.97875	0.09832	0.3915	0.12317
		3.97092	0.02957	1.98546	0.05061	0.99273	0.08314	0.39709	0.11112
		4.02685	0.0302	2.01342	0.04969	1.00671	0.06945	0.40269	0.10724
		4.08277	0.02673	2.04139	0.04007	1.02069	0.06307	0.40828	0.11023
		4.1387	0.02771	2.06935	0.02798	1.03468	0.06379	0.41387	0.10963
		4.19463	0.02699	2.09732	0.03114	1.04866	0.05564	0.41946	0.10329
				2.12528	0.03195	1.06264	0.05349	0.42506	0.09529
				2.15324	0.03935	1.07662	0.05171	0.43065	0.09205
				2.18121	0.02592	1.0906	0.04888	0.43624	0.08808
				2.20917	0.02153	1.10459	0.03817	0.44183	0.07413
				2.23714	0.01968	1.11857	0.02172	0.44743	0.06291
				2.2651	0.01951	1.13255	0.02176	0.45302	0.07535
				2.29306	0.01944	1.14653	0.02518	0.45861	0.06612
				2.32103	0.01896	1.16052	0.02446	0.46421	0.07483
				2.34899	0.01819	1.1745	0.02176	0.4698	0.07079
				2.37696	0.012	1.18848	0.0216	0.47539	0.06866
				2.40492	0.00747	1.20246	0.02115	0.48098	0.06455
				2.43289	0.01004	1.21644	0.01758	0.48658	0.06235
				2.46085	0.01388	1.23043	0.01103	0.49217	0.04837
				2.48881	0.01644	1.24441	0.0126	0.49776	0.03662
				2.51678	0.01037	1.25839	0.01749	0.50336	0.03548
				2.54474	0.01396	1.27237	0.02071	0.50895	0.03406
				2.57271	0.00692	1.28635	0.01942	0.51454	0.02719
				2.60067	0.00753	1.30034	0.01832	0.52013	0.03066
				2.62864	0.00409	1.31432	0.01102	0.52573	0.03105
				2.6566	0.00252	1.3283	0.00509	0.53132	0.02405
				2.68456	0.01123	1.34228	-0.00225	0.53691	0.01229
				2.71253	0.01298	1.35626	0.0034	0.54251	0.0028
				2.74049	0.00985	1.37025	0.01092	0.5481	0.00847
				2.76846	0.000905	1.38423	0.01326	0.55369	0.01475
				2.79642	-0.00428	1.39821	0.01017	0.55928	0.01541
				2.82438	0.00193	1.41219	0.00454	0.56488	0.0084
				2.85235	-0.00726	1.42617	0.00835	0.57047	0.00696
				2.88031	-0.00369	1.44016	0.00927	0.57606	0.00984
				2.90828	-0.00431	1.45414	0.00893	0.58166	0.00113
				2.93624	0.00389	1.46812	0.00252	0.58725	0.01379
				2.96421	0.00101	1.4821	-0.00435	0.59284	0.00622
				2.99217	0.0072	1.49609	-0.00301	0.59843	0.00551
				3.02013	0.01182	1.51007	-0.00506	0.60403	0.00176
				3.0481	0.00463	1.52405	-0.00324	0.60962	-0.00362
				3.07606	-0.00384	1.53803	-0.00379	0.61521	-0.0113
				3.10403	-0.01136	1.55201	-0.00298	0.62081	-0.00233
				3.13199	-0.00704	1.566	-0.00293	0.6264	-0.00199
				3.15996	-0.00581	1.57998	-0.00468	0.63199	-0.00339
				3.18792	-0.000912	1.59396	-0.00227	0.63758	0.00153
				3.21588	0.00233	1.60794	-0.00327	0.64318	0.00141
				3.24385	-0.00181	1.62192	-0.000323	0.64877	-0.00396
				3.27181	-0.00916	1.63591	-0.000993	0.65436	-0.01313
				3.29978	-0.0077	1.64989	-0.00321	0.65995	-0.01195
				3.32774	0.000772	1.66387	-0.00776	0.66555	-0.00804
				3.3557	0.0063	1.67785	-0.0078	0.67114	-0.00646
				3.38367	0.00622	1.69183	-0.00129	0.67673	0.000472
				3.41163	0.00208	1.70582	0.00304	0.68233	-0.00173
				3.4396	0.00538	1.7198	0.00452	0.68792	-0.00524
				3.46756	0.00994	1.73378	-0.0044	0.69351	-0.00464
				3.49553	0.00826	1.74776	-0.00612	0.6991	-0.00839
				3.52349	0.01163	1.76174	-0.00819	0.7047	-0.01634
				3.55145	0.00197	1.77573	-0.00257	0.71029	-0.01105
				3.57942	0.00169	1.78971	-0.00713	0.71588	-0.017
				3.60738	0.000153	1.80369	-0.00762	0.72148	-0.01681
				3.63535	-0.00405	1.81767	-0.00296	0.72707	-0.02025
				3.66331	-0.00803	1.83166	0.00802	0.73266	-0.02566
				3.69128	-0.01413	1.84564	0.00865	0.73825	-0.01487
				3.71924	-0.00834	1.85962	0.00442	0.74385	-0.01237
				3.7472	-0.00701	1.8736	-0.0044	0.74944	-0.01854
				3.77517	-0.00777	1.88758	0.000869	0.75503	-0.02243
				3.80313	-0.0112	1.90157	0.00359	0.76063	-0.02144
				3.8311	-0.00439	1.91555	0.01157	0.76622	-0.02315
				3.85906	-0.00117	1.92953	0.00954	0.77181	-0.00808
				3.88703	0.000862	1.94351	0.00414	0.77741	0.0032
				3.91499	-9.1e-05	1.95749	-0.00179	0.783	0.01802
				3.94295	-0.00509	1.97148	-0.00451	0.78859	0.01379
				3.97092	0.00551	1.98546	0.00174	0.79418	0.01831
				3.99888	0.0122	1.99944	0.00599	0.79978	0.01563
				4.02685	0.0239	2.01342	0.00267	0.80537	0.01486
				4.05481	0.0138	2.0274	-0.00269	0.81096	0.01741
				4.08277	0.00472	2.04139	-0.00321	0.81656	0.02481
				4.11074	-0.0031	2.05537	-0.00294	0.82215	0.02931
				4.1387	-0.00437	2.06935	-0.00211	0.82774	0.0327
				4.16667	-0.00319	2.08333	-0.00823	0.83333	0.03894

## Sheet: Fig5e
--	--	0	0.000302829	--	--	0	0.00112	--	--	0	0.000777699	--	--	0	0.00154
0.2	0.0013	0.00501	0.000333022	0.2	0.0031	0.00501	0.00117	0.2	0.0013	0.00501	0.000812869	0.2	0.011	0.00501	0.00186
0.5	0.0038	0.01001	0.000363215	0.5	0.0059	0.01001	0.00121	0.5	0.0051	0.01001	0.000848038	0.5	0.048	0.01001	0.00219
1	0.0061	0.01502	0.000393407	1	0.0115	0.01502	0.00126	1	0.0079	0.01502	0.000883208	1	0.071	0.01502	0.00251
2	0.0128	0.02002	0.0004236	2	0.0207	0.02002	0.00131	2	0.0162	0.02002	0.000918377	2	0.112	0.02002	0.00284
5	0.0303	0.02503	0.000453793	5	0.0483	0.02503	0.00136	5	0.0353	0.02503	0.000953547	5	0.331	0.02503	0.00316
--	--	0.03003	0.000483986	--	--	0.03003	0.0014	--	--	0.03003	0.000988716	--	--	0.03003	0.00349
--	--	0.03504	0.000514179	--	--	0.03504	0.00145	--	--	0.03504	0.00102	--	--	0.03504	0.00381
--	--	0.04004	0.000544372	--	--	0.04004	0.0015	--	--	0.04004	0.00106	--	--	0.04004	0.00413
--	--	0.04505	0.000574565	--	--	0.04505	0.00155	--	--	0.04505	0.00109	--	--	0.04505	0.00446
--	--	0.05005	0.000604757	--	--	0.05005	0.00159	--	--	0.05005	0.00113	--	--	0.05005	0.00478
--	--	0.05506	0.00063495	--	--	0.05506	0.00164	--	--	0.05506	0.00116	--	--	0.05506	0.00511
--	--	0.06006	0.000665143	--	--	0.06006	0.00169	--	--	0.06006	0.0012	--	--	0.06006	0.00543
--	--	0.06507	0.000695336	--	--	0.06507	0.00174	--	--	0.06507	0.00123	--	--	0.06507	0.00576
--	--	0.07007	0.000725529	--	--	0.07007	0.00179	--	--	0.07007	0.00127	--	--	0.07007	0.00608
--	--	0.07508	0.000755722	--	--	0.07508	0.00183	--	--	0.07508	0.00131	--	--	0.07508	0.0064
--	--	0.08008	0.000785914	--	--	0.08008	0.00188	--	--	0.08008	0.00134	--	--	0.08008	0.00673
--	--	0.08509	0.000816107	--	--	0.08509	0.00193	--	--	0.08509	0.00138	--	--	0.08509	0.00705
--	--	0.09009	0.0008463	--	--	0.09009	0.00198	--	--	0.09009	0.00141	--	--	0.09009	0.00738
--	--	0.0951	0.000876493	--	--	0.0951	0.00202	--	--	0.0951	0.00145	--	--	0.0951	0.0077
--	--	0.1001	0.000906686	--	--	0.1001	0.00207	--	--	0.1001	0.00148	--	--	0.1001	0.00803
--	--	0.10511	0.000936879	--	--	0.10511	0.00212	--	--	0.10511	0.00152	--	--	0.10511	0.00835
--	--	0.11011	0.000967072	--	--	0.11011	0.00217	--	--	0.11011	0.00155	--	--	0.11011	0.00867
--	--	0.11512	0.000997264	--	--	0.11512	0.00221	--	--	0.11512	0.00159	--	--	0.11512	0.009
--	--	0.12012	0.00103	--	--	0.12012	0.00226	--	--	0.12012	0.00162	--	--	0.12012	0.00932
--	--	0.12513	0.00106	--	--	0.12513	0.00231	--	--	0.12513	0.00166	--	--	0.12513	0.00965
--	--	0.13013	0.00109	--	--	0.13013	0.00236	--	--	0.13013	0.00169	--	--	0.13013	0.00997
--	--	0.13514	0.00112	--	--	0.13514	0.0024	--	--	0.13514	0.00173	--	--	0.13514	0.0103
--	--	0.14014	0.00115	--	--	0.14014	0.00245	--	--	0.14014	0.00176	--	--	0.14014	0.01062
--	--	0.14515	0.00118	--	--	0.14515	0.0025	--	--	0.14515	0.0018	--	--	0.14515	0.01094
--	--	0.15015	0.00121	--	--	0.15015	0.00255	--	--	0.15015	0.00183	--	--	0.15015	0.01127
--	--	0.15516	0.00124	--	--	0.15516	0.00259	--	--	0.15516	0.00187	--	--	0.15516	0.01159
--	--	0.16016	0.00127	--	--	0.16016	0.00264	--	--	0.16016	0.0019	--	--	0.16016	0.01192
--	--	0.16517	0.0013	--	--	0.16517	0.00269	--	--	0.16517	0.00194	--	--	0.16517	0.01224
--	--	0.17017	0.00133	--	--	0.17017	0.00274	--	--	0.17017	0.00197	--	--	0.17017	0.01257
--	--	0.17518	0.00136	--	--	0.17518	0.00279	--	--	0.17518	0.00201	--	--	0.17518	0.01289
--	--	0.18018	0.00139	--	--	0.18018	0.00283	--	--	0.18018	0.00204	--	--	0.18018	0.01321
--	--	0.18519	0.00142	--	--	0.18519	0.00288	--	--	0.18519	0.00208	--	--	0.18519	0.01354
--	--	0.19019	0.00145	--	--	0.19019	0.00293	--	--	0.19019	0.00211	--	--	0.19019	0.01386
--	--	0.1952	0.00148	--	--	0.1952	0.00298	--	--	0.1952	0.00215	--	--	0.1952	0.01419
--	--	0.2002	0.00151	--	--	0.2002	0.00302	--	--	0.2002	0.00218	--	--	0.2002	0.01451
--	--	0.20521	0.00154	--	--	0.20521	0.00307	--	--	0.20521	0.00222	--	--	0.20521	0.01484
--	--	0.21021	0.00157	--	--	0.21021	0.00312	--	--	0.21021	0.00225	--	--	0.21021	0.01516
--	--	0.21522	0.0016	--	--	0.21522	0.00317	--	--	0.21522	0.00229	--	--	0.21522	0.01549
--	--	0.22022	0.00163	--	--	0.22022	0.00321	--	--	0.22022	0.00233	--	--	0.22022	0.01581
--	--	0.22523	0.00166	--	--	0.22523	0.00326	--	--	0.22523	0.00236	--	--	0.22523	0.01613
--	--	0.23023	0.00169	--	--	0.23023	0.00331	--	--	0.23023	0.0024	--	--	0.23023	0.01646
--	--	0.23524	0.00172	--	--	0.23524	0.00336	--	--	0.23524	0.00243	--	--	0.23524	0.01678
--	--	0.24024	0.00175	--	--	0.24024	0.0034	--	--	0.24024	0.00247	--	--	0.24024	0.01711
--	--	0.24525	0.00178	--	--	0.24525	0.00345	--	--	0.24525	0.0025	--	--	0.24525	0.01743
--	--	0.25025	0.00181	--	--	0.25025	0.0035	--	--	0.25025	0.00254	--	--	0.25025	0.01776
--	--	0.25526	0.00184	--	--	0.25526	0.00355	--	--	0.25526	0.00257	--	--	0.25526	0.01808
--	--	0.26026	0.00187	--	--	0.26026	0.0036	--	--	0.26026	0.00261	--	--	0.26026	0.0184
--	--	0.26527	0.0019	--	--	0.26527	0.00364	--	--	0.26527	0.00264	--	--	0.26527	0.01873
--	--	0.27027	0.00193	--	--	0.27027	0.00369	--	--	0.27027	0.00268	--	--	0.27027	0.01905
--	--	0.27528	0.00196	--	--	0.27528	0.00374	--	--	0.27528	0.00271	--	--	0.27528	0.01938
--	--	0.28028	0.00199	--	--	0.28028	0.00379	--	--	0.28028	0.00275	--	--	0.28028	0.0197
--	--	0.28529	0.00202	--	--	0.28529	0.00383	--	--	0.28529	0.00278	--	--	0.28529	0.02003
--	--	0.29029	0.00205	--	--	0.29029	0.00388	--	--	0.29029	0.00282	--	--	0.29029	0.02035
--	--	0.2953	0.00208	--	--	0.2953	0.00393	--	--	0.2953	0.00285	--	--	0.2953	0.02067
--	--	0.3003	0.00211	--	--	0.3003	0.00398	--	--	0.3003	0.00289	--	--	0.3003	0.021
--	--	0.30531	0.00214	--	--	0.30531	0.00402	--	--	0.30531	0.00292	--	--	0.30531	0.02132
--	--	0.31031	0.00217	--	--	0.31031	0.00407	--	--	0.31031	0.00296	--	--	0.31031	0.02165
--	--	0.31532	0.0022	--	--	0.31532	0.00412	--	--	0.31532	0.00299	--	--	0.31532	0.02197
--	--	0.32032	0.00224	--	--	0.32032	0.00417	--	--	0.32032	0.00303	--	--	0.32032	0.0223
--	--	0.32533	0.00227	--	--	0.32533	0.00421	--	--	0.32533	0.00306	--	--	0.32533	0.02262
--	--	0.33033	0.0023	--	--	0.33033	0.00426	--	--	0.33033	0.0031	--	--	0.33033	0.02294
--	--	0.33534	0.00233	--	--	0.33534	0.00431	--	--	0.33534	0.00313	--	--	0.33534	0.02327
--	--	0.34034	0.00236	--	--	0.34034	0.00436	--	--	0.34034	0.00317	--	--	0.34034	0.02359
--	--	0.34535	0.00239	--	--	0.34535	0.0044	--	--	0.34535	0.0032	--	--	0.34535	0.02392
--	--	0.35035	0.00242	--	--	0.35035	0.00445	--	--	0.35035	0.00324	--	--	0.35035	0.02424
--	--	0.35536	0.00245	--	--	0.35536	0.0045	--	--	0.35536	0.00327	--	--	0.35536	0.02457
--	--	0.36036	0.00248	--	--	0.36036	0.00455	--	--	0.36036	0.00331	--	--	0.36036	0.02489
--	--	0.36537	0.00251	--	--	0.36537	0.0046	--	--	0.36537	0.00335	--	--	0.36537	0.02522
--	--	0.37037	0.00254	--	--	0.37037	0.00464	--	--	0.37037	0.00338	--	--	0.37037	0.02554
--	--	0.37538	0.00257	--	--	0.37538	0.00469	--	--	0.37538	0.00342	--	--	0.37538	0.02586
--	--	0.38038	0.0026	--	--	0.38038	0.00474	--	--	0.38038	0.00345	--	--	0.38038	0.02619
--	--	0.38539	0.00263	--	--	0.38539	0.00479	--	--	0.38539	0.00349	--	--	0.38539	0.02651
--	--	0.39039	0.00266	--	--	0.39039	0.00483	--	--	0.39039	0.00352	--	--	0.39039	0.02684
--	--	0.3954	0.00269	--	--	0.3954	0.00488	--	--	0.3954	0.00356	--	--	0.3954	0.02716
--	--	0.4004	0.00272	--	--	0.4004	0.00493	--	--	0.4004	0.00359	--	--	0.4004	0.02749
--	--	0.40541	0.00275	--	--	0.40541	0.00498	--	--	0.40541	0.00363	--	--	0.40541	0.02781
--	--	0.41041	0.00278	--	--	0.41041	0.00502	--	--	0.41041	0.00366	--	--	0.41041	0.02813
--	--	0.41542	0.00281	--	--	0.41542	0.00507	--	--	0.41542	0.0037	--	--	0.41542	0.02846
--	--	0.42042	0.00284	--	--	0.42042	0.00512	--	--	0.42042	0.00373	--	--	0.42042	0.02878
--	--	0.42543	0.00287	--	--	0.42543	0.00517	--	--	0.42543	0.00377	--	--	0.42543	0.02911
--	--	0.43043	0.0029	--	--	0.43043	0.00521	--	--	0.43043	0.0038	--	--	0.43043	0.02943
--	--	0.43544	0.00293	--	--	0.43544	0.00526	--	--	0.43544	0.00384	--	--	0.43544	0.02976
--	--	0.44044	0.00296	--	--	0.44044	0.00531	--	--	0.44044	0.00387	--	--	0.44044	0.03008
--	--	0.44545	0.00299	--	--	0.44545	0.00536	--	--	0.44545	0.00391	--	--	0.44545	0.0304
--	--	0.45045	0.00302	--	--	0.45045	0.0054	--	--	0.45045	0.00394	--	--	0.45045	0.03073
--	--	0.45546	0.00305	--	--	0.45546	0.00545	--	--	0.45546	0.00398	--	--	0.45546	0.03105
--	--	0.46046	0.00308	--	--	0.46046	0.0055	--	--	0.46046	0.00401	--	--	0.46046	0.03138
--	--	0.46547	0.00311	--	--	0.46547	0.00555	--	--	0.46547	0.00405	--	--	0.46547	0.0317
--	--	0.47047	0.00314	--	--	0.47047	0.0056	--	--	0.47047	0.00408	--	--	0.47047	0.03203
--	--	0.47548	0.00317	--	--	0.47548	0.00564	--	--	0.47548	0.00412	--	--	0.47548	0.03235
--	--	0.48048	0.0032	--	--	0.48048	0.00569	--	--	0.48048	0.00415	--	--	0.48048	0.03267
--	--	0.48549	0.00323	--	--	0.48549	0.00574	--	--	0.48549	0.00419	--	--	0.48549	0.033
--	--	0.49049	0.00326	--	--	0.49049	0.00579	--	--	0.49049	0.00422	--	--	0.49049	0.03332
--	--	0.4955	0.00329	--	--	0.4955	0.00583	--	--	0.4955	0.00426	--	--	0.4955	0.03365
--	--	0.5005	0.00332	--	--	0.5005	0.00588	--	--	0.5005	0.00429	--	--	0.5005	0.03397
--	--	0.50551	0.00335	--	--	0.50551	0.00593	--	--	0.50551	0.00433	--	--	0.50551	0.0343
--	--	0.51051	0.00338	--	--	0.51051	0.00598	--	--	0.51051	0.00436	--	--	0.51051	0.03462
--	--	0.51552	0.00341	--	--	0.51552	0.00602	--	--	0.51552	0.0044	--	--	0.51552	0.03494
--	--	0.52052	0.00344	--	--	0.52052	0.00607	--	--	0.52052	0.00444	--	--	0.52052	0.03527
--	--	0.52553	0.00347	--	--	0.52553	0.00612	--	--	0.52553	0.00447	--	--	0.52553	0.03559
--	--	0.53053	0.0035	--	--	0.53053	0.00617	--	--	0.53053	0.00451	--	--	0.53053	0.03592
--	--	0.53554	0.00353	--	--	0.53554	0.00621	--	--	0.53554	0.00454	--	--	0.53554	0.03624
--	--	0.54054	0.00356	--	--	0.54054	0.00626	--	--	0.54054	0.00458	--	--	0.54054	0.03657
--	--	0.54555	0.00359	--	--	0.54555	0.00631	--	--	0.54555	0.00461	--	--	0.54555	0.03689
--	--	0.55055	0.00362	--	--	0.55055	0.00636	--	--	0.55055	0.00465	--	--	0.55055	0.03722
--	--	0.55556	0.00365	--	--	0.55556	0.00641	--	--	0.55556	0.00468	--	--	0.55556	0.03754
--	--	0.56056	0.00368	--	--	0.56056	0.00645	--	--	0.56056	0.00472	--	--	0.56056	0.03786
--	--	0.56557	0.00371	--	--	0.56557	0.0065	--	--	0.56557	0.00475	--	--	0.56557	0.03819
--	--	0.57057	0.00374	--	--	0.57057	0.00655	--	--	0.57057	0.00479	--	--	0.57057	0.03851
--	--	0.57558	0.00378	--	--	0.57558	0.0066	--	--	0.57558	0.00482	--	--	0.57558	0.03884
--	--	0.58058	0.00381	--	--	0.58058	0.00664	--	--	0.58058	0.00486	--	--	0.58058	0.03916
--	--	0.58559	0.00384	--	--	0.58559	0.00669	--	--	0.58559	0.00489	--	--	0.58559	0.03949
--	--	0.59059	0.00387	--	--	0.59059	0.00674	--	--	0.59059	0.00493	--	--	0.59059	0.03981
--	--	0.5956	0.0039	--	--	0.5956	0.00679	--	--	0.5956	0.00496	--	--	0.5956	0.04013
--	--	0.6006	0.00393	--	--	0.6006	0.00683	--	--	0.6006	0.005	--	--	0.6006	0.04046
--	--	0.60561	0.00396	--	--	0.60561	0.00688	--	--	0.60561	0.00503	--	--	0.60561	0.04078
--	--	0.61061	0.00399	--	--	0.61061	0.00693	--	--	0.61061	0.00507	--	--	0.61061	0.04111
--	--	0.61562	0.00402	--	--	0.61562	0.00698	--	--	0.61562	0.0051	--	--	0.61562	0.04143
--	--	0.62062	0.00405	--	--	0.62062	0.00702	--	--	0.62062	0.00514	--	--	0.62062	0.04176
--	--	0.62563	0.00408	--	--	0.62563	0.00707	--	--	0.62563	0.00517	--	--	0.62563	0.04208
--	--	0.63063	0.00411	--	--	0.63063	0.00712	--	--	0.63063	0.00521	--	--	0.63063	0.0424
--	--	0.63564	0.00414	--	--	0.63564	0.00717	--	--	0.63564	0.00524	--	--	0.63564	0.04273
--	--	0.64064	0.00417	--	--	0.64064	0.00721	--	--	0.64064	0.00528	--	--	0.64064	0.04305
--	--	0.64565	0.0042	--	--	0.64565	0.00726	--	--	0.64565	0.00531	--	--	0.64565	0.04338
--	--	0.65065	0.00423	--	--	0.65065	0.00731	--	--	0.65065	0.00535	--	--	0.65065	0.0437
--	--	0.65566	0.00426	--	--	0.65566	0.00736	--	--	0.65566	0.00538	--	--	0.65566	0.04403
--	--	0.66066	0.00429	--	--	0.66066	0.00741	--	--	0.66066	0.00542	--	--	0.66066	0.04435
--	--	0.66567	0.00432	--	--	0.66567	0.00745	--	--	0.66567	0.00546	--	--	0.66567	0.04467
--	--	0.67067	0.00435	--	--	0.67067	0.0075	--	--	0.67067	0.00549	--	--	0.67067	0.045
--	--	0.67568	0.00438	--	--	0.67568	0.00755	--	--	0.67568	0.00553	--	--	0.67568	0.04532
--	--	0.68068	0.00441	--	--	0.68068	0.0076	--	--	0.68068	0.00556	--	--	0.68068	0.04565
--	--	0.68569	0.00444	--	--	0.68569	0.00764	--	--	0.68569	0.0056	--	--	0.68569	0.04597
--	--	0.69069	0.00447	--	--	0.69069	0.00769	--	--	0.69069	0.00563	--	--	0.69069	0.0463
--	--	0.6957	0.0045	--	--	0.6957	0.00774	--	--	0.6957	0.00567	--	--	0.6957	0.04662
--	--	0.7007	0.00453	--	--	0.7007	0.00779	--	--	0.7007	0.0057	--	--	0.7007	0.04694
--	--	0.70571	0.00456	--	--	0.70571	0.00783	--	--	0.70571	0.00574	--	--	0.70571	0.04727
--	--	0.71071	0.00459	--	--	0.71071	0.00788	--	--	0.71071	0.00577	--	--	0.71071	0.04759
--	--	0.71572	0.00462	--	--	0.71572	0.00793	--	--	0.71572	0.00581	--	--	0.71572	0.04792
--	--	0.72072	0.00465	--	--	0.72072	0.00798	--	--	0.72072	0.00584	--	--	0.72072	0.04824
--	--	0.72573	0.00468	--	--	0.72573	0.00802	--	--	0.72573	0.00588	--	--	0.72573	0.04857
--	--	0.73073	0.00471	--	--	0.73073	0.00807	--	--	0.73073	0.00591	--	--	0.73073	0.04889
--	--	0.73574	0.00474	--	--	0.73574	0.00812	--	--	0.73574	0.00595	--	--	0.73574	0.04922
--	--	0.74074	0.00477	--	--	0.74074	0.00817	--	--	0.74074	0.00598	--	--	0.74074	0.04954
--	--	0.74575	0.0048	--	--	0.74575	0.00821	--	--	0.74575	0.00602	--	--	0.74575	0.04986
--	--	0.75075	0.00483	--	--	0.75075	0.00826	--	--	0.75075	0.00605	--	--	0.75075	0.05019
		0.75576	0.00486			0.75576	0.00831			0.75576	0.00609			0.75576	0.05051
		0.76076	0.00489			0.76076	0.00836			0.76076	0.00612			0.76076	0.05084
		0.76577	0.00492			0.76577	0.00841			0.76577	0.00616			0.76577	0.05116
		0.77077	0.00495			0.77077	0.00845			0.77077	0.00619			0.77077	0.05149
		0.77578	0.00498			0.77578	0.0085			0.77578	0.00623			0.77578	0.05181
		0.78078	0.00501			0.78078	0.00855			0.78078	0.00626			0.78078	0.05213
		0.78579	0.00504			0.78579	0.0086			0.78579	0.0063			0.78579	0.05246
		0.79079	0.00507			0.79079	0.00864			0.79079	0.00633			0.79079	0.05278
		0.7958	0.0051			0.7958	0.00869			0.7958	0.00637			0.7958	0.05311
		0.8008	0.00513			0.8008	0.00874			0.8008	0.0064			0.8008	0.05343
		0.80581	0.00516			0.80581	0.00879			0.80581	0.00644			0.80581	0.05376
		0.81081	0.00519			0.81081	0.00883			0.81081	0.00648			0.81081	0.05408
		0.81582	0.00522			0.81582	0.00888			0.81582	0.00651			0.81582	0.0544
		0.82082	0.00525			0.82082	0.00893			0.82082	0.00655			0.82082	0.05473
		0.82583	0.00528			0.82583	0.00898			0.82583	0.00658			0.82583	0.05505
		0.83083	0.00531			0.83083	0.00902			0.83083	0.00662			0.83083	0.05538
		0.83584	0.00535			0.83584	0.00907			0.83584	0.00665			0.83584	0.0557
		0.84084	0.00538			0.84084	0.00912			0.84084	0.00669			0.84084	0.05603
		0.84585	0.00541			0.84585	0.00917			0.84585	0.00672			0.84585	0.05635
		0.85085	0.00544			0.85085	0.00922			0.85085	0.00676			0.85085	0.05667
		0.85586	0.00547			0.85586	0.00926			0.85586	0.00679			0.85586	0.057
		0.86086	0.0055			0.86086	0.00931			0.86086	0.00683			0.86086	0.05732
		0.86587	0.00553			0.86587	0.00936			0.86587	0.00686			0.86587	0.05765
		0.87087	0.00556			0.87087	0.00941			0.87087	0.0069			0.87087	0.05797
		0.87588	0.00559			0.87588	0.00945			0.87588	0.00693			0.87588	0.0583
		0.88088	0.00562			0.88088	0.0095			0.88088	0.00697			0.88088	0.05862
		0.88589	0.00565			0.88589	0.00955			0.88589	0.007			0.88589	0.05895
		0.89089	0.00568			0.89089	0.0096			0.89089	0.00704			0.89089	0.05927
		0.8959	0.00571			0.8959	0.00964			0.8959	0.00707			0.8959	0.05959
		0.9009	0.00574			0.9009	0.00969			0.9009	0.00711			0.9009	0.05992
		0.90591	0.00577			0.90591	0.00974			0.90591	0.00714			0.90591	0.06024
		0.91091	0.0058			0.91091	0.00979			0.91091	0.00718			0.91091	0.06057
		0.91592	0.00583			0.91592	0.00983			0.91592	0.00721			0.91592	0.06089
		0.92092	0.00586			0.92092	0.00988			0.92092	0.00725			0.92092	0.06122
		0.92593	0.00589			0.92593	0.00993			0.92593	0.00728			0.92593	0.06154
		0.93093	0.00592			0.93093	0.00998			0.93093	0.00732			0.93093	0.06186
		0.93594	0.00595			0.93594	0.01002			0.93594	0.00735			0.93594	0.06219
		0.94094	0.00598			0.94094	0.01007			0.94094	0.00739			0.94094	0.06251
		0.94595	0.00601			0.94595	0.01012			0.94595	0.00742			0.94595	0.06284
		0.95095	0.00604			0.95095	0.01017			0.95095	0.00746			0.95095	0.06316
		0.95596	0.00607			0.95596	0.01022			0.95596	0.0075			0.95596	0.06349
		0.96096	0.0061			0.96096	0.01026			0.96096	0.00753			0.96096	0.06381
		0.96597	0.00613			0.96597	0.01031			0.96597	0.00757			0.96597	0.06413
		0.97097	0.00616			0.97097	0.01036			0.97097	0.0076			0.97097	0.06446
		0.97598	0.00619			0.97598	0.01041			0.97598	0.00764			0.97598	0.06478
		0.98098	0.00622			0.98098	0.01045			0.98098	0.00767			0.98098	0.06511
		0.98599	0.00625			0.98599	0.0105			0.98599	0.00771			0.98599	0.06543
		0.99099	0.00628			0.99099	0.01055			0.99099	0.00774			0.99099	0.06576
		0.996	0.00631			0.996	0.0106			0.996	0.00778			0.996	0.06608
		1.001	0.00634			1.001	0.01064			1.001	0.00781			1.001	0.0664
		1.00601	0.00637			1.00601	0.01069			1.00601	0.00785			1.00601	0.06673
		1.01101	0.0064			1.01101	0.01074			1.01101	0.00788			1.01101	0.06705
		1.01602	0.00643			1.01602	0.01079			1.01602	0.00792			1.01602	0.06738
		1.02102	0.00646			1.02102	0.01083			1.02102	0.00795			1.02102	0.0677
		1.02603	0.00649			1.02603	0.01088			1.02603	0.00799			1.02603	0.06803
		1.03103	0.00652			1.03103	0.01093			1.03103	0.00802			1.03103	0.06835
		1.03604	0.00655			1.03604	0.01098			1.03604	0.00806			1.03604	0.06867
		1.04104	0.00658			1.04104	0.01103			1.04104	0.00809			1.04104	0.069
		1.04605	0.00661			1.04605	0.01107			1.04605	0.00813			1.04605	0.06932
		1.05105	0.00664			1.05105	0.01112			1.05105	0.00816			1.05105	0.06965
		1.05606	0.00667			1.05606	0.01117			1.05606	0.0082			1.05606	0.06997
		1.06106	0.0067			1.06106	0.01122			1.06106	0.00823			1.06106	0.0703
		1.06607	0.00673			1.06607	0.01126			1.06607	0.00827			1.06607	0.07062
		1.07107	0.00676			1.07107	0.01131			1.07107	0.0083			1.07107	0.07095
		1.07608	0.00679			1.07608	0.01136			1.07608	0.00834			1.07608	0.07127
		1.08108	0.00682			1.08108	0.01141			1.08108	0.00837			1.08108	0.07159
		1.08609	0.00685			1.08609	0.01145			1.08609	0.00841			1.08609	0.07192
		1.09109	0.00688			1.09109	0.0115			1.09109	0.00844			1.09109	0.07224
		1.0961	0.00692			1.0961	0.01155			1.0961	0.00848			1.0961	0.07257
		1.1011	0.00695			1.1011	0.0116			1.1011	0.00851			1.1011	0.07289
		1.10611	0.00698			1.10611	0.01164			1.10611	0.00855			1.10611	0.07322
		1.11111	0.00701			1.11111	0.01169			1.11111	0.00859			1.11111	0.07354
		1.11612	0.00704			1.11612	0.01174			1.11612	0.00862			1.11612	0.07386
		1.12112	0.00707			1.12112	0.01179			1.12112	0.00866			1.12112	0.07419
		1.12613	0.0071			1.12613	0.01183			1.12613	0.00869			1.12613	0.07451
		1.13113	0.00713			1.13113	0.01188			1.13113	0.00873			1.13113	0.07484
		1.13614	0.00716			1.13614	0.01193			1.13614	0.00876			1.13614	0.07516
		1.14114	0.00719			1.14114	0.01198			1.14114	0.0088			1.14114	0.07549
		1.14615	0.00722			1.14615	0.01203			1.14615	0.00883			1.14615	0.07581
		1.15115	0.00725			1.15115	0.01207			1.15115	0.00887			1.15115	0.07613
		1.15616	0.00728			1.15616	0.01212			1.15616	0.0089			1.15616	0.07646
		1.16116	0.00731			1.16116	0.01217			1.16116	0.00894			1.16116	0.07678
		1.16617	0.00734			1.16617	0.01222			1.16617	0.00897			1.16617	0.07711
		1.17117	0.00737			1.17117	0.01226			1.17117	0.00901			1.17117	0.07743
		1.17618	0.0074			1.17618	0.01231			1.17618	0.00904			1.17618	0.07776
		1.18118	0.00743			1.18118	0.01236			1.18118	0.00908			1.18118	0.07808
		1.18619	0.00746			1.18619	0.01241			1.18619	0.00911			1.18619	0.0784
		1.19119	0.00749			1.19119	0.01245			1.19119	0.00915			1.19119	0.07873
		1.1962	0.00752			1.1962	0.0125			1.1962	0.00918			1.1962	0.07905
		1.2012	0.00755			1.2012	0.01255			1.2012	0.00922			1.2012	0.07938
		1.20621	0.00758			1.20621	0.0126			1.20621	0.00925			1.20621	0.0797
		1.21121	0.00761			1.21121	0.01264			1.21121	0.00929			1.21121	0.08003
		1.21622	0.00764			1.21622	0.01269			1.21622	0.00932			1.21622	0.08035
		1.22122	0.00767			1.22122	0.01274			1.22122	0.00936			1.22122	0.08068
		1.22623	0.0077			1.22623	0.01279			1.22623	0.00939			1.22623	0.081
		1.23123	0.00773			1.23123	0.01283			1.23123	0.00943			1.23123	0.08132
		1.23624	0.00776			1.23624	0.01288			1.23624	0.00946			1.23624	0.08165
		1.24124	0.00779			1.24124	0.01293			1.24124	0.0095			1.24124	0.08197
		1.24625	0.00782			1.24625	0.01298			1.24625	0.00953			1.24625	0.0823
		1.25125	0.00785			1.25125	0.01303			1.25125	0.00957			1.25125	0.08262
		1.25626	0.00788			1.25626	0.01307			1.25626	0.00961			1.25626	0.08295
		1.26126	0.00791			1.26126	0.01312			1.26126	0.00964			1.26126	0.08327
		1.26627	0.00794			1.26627	0.01317			1.26627	0.00968			1.26627	0.08359
		1.27127	0.00797			1.27127	0.01322			1.27127	0.00971			1.27127	0.08392
		1.27628	0.008			1.27628	0.01326			1.27628	0.00975			1.27628	0.08424
		1.28128	0.00803			1.28128	0.01331			1.28128	0.00978			1.28128	0.08457
		1.28629	0.00806			1.28629	0.01336			1.28629	0.00982			1.28629	0.08489
		1.29129	0.00809			1.29129	0.01341			1.29129	0.00985			1.29129	0.08522
		1.2963	0.00812			1.2963	0.01345			1.2963	0.00989			1.2963	0.08554
		1.3013	0.00815			1.3013	0.0135			1.3013	0.00992			1.3013	0.08586
		1.30631	0.00818			1.30631	0.01355			1.30631	0.00996			1.30631	0.08619
		1.31131	0.00821			1.31131	0.0136			1.31131	0.00999			1.31131	0.08651
		1.31632	0.00824			1.31632	0.01364			1.31632	0.01003			1.31632	0.08684
		1.32132	0.00827			1.32132	0.01369			1.32132	0.01006			1.32132	0.08716
		1.32633	0.0083			1.32633	0.01374			1.32633	0.0101			1.32633	0.08749
		1.33133	0.00833			1.33133	0.01379			1.33133	0.01013			1.33133	0.08781
		1.33634	0.00836			1.33634	0.01384			1.33634	0.01017			1.33634	0.08813
		1.34134	0.00839			1.34134	0.01388			1.34134	0.0102			1.34134	0.08846
		1.34635	0.00842			1.34635	0.01393			1.34635	0.01024			1.34635	0.08878
		1.35135	0.00845			1.35135	0.01398			1.35135	0.01027			1.35135	0.08911
		1.35636	0.00849			1.35636	0.01403			1.35636	0.01031			1.35636	0.08943
		1.36136	0.00852			1.36136	0.01407			1.36136	0.01034			1.36136	0.08976
		1.36637	0.00855			1.36637	0.01412			1.36637	0.01038			1.36637	0.09008
		1.37137	0.00858			1.37137	0.01417			1.37137	0.01041			1.37137	0.0904
		1.37638	0.00861			1.37638	0.01422			1.37638	0.01045			1.37638	0.09073
		1.38138	0.00864			1.38138	0.01426			1.38138	0.01048			1.38138	0.09105
		1.38639	0.00867			1.38639	0.01431			1.38639	0.01052			1.38639	0.09138
		1.39139	0.0087			1.39139	0.01436			1.39139	0.01055			1.39139	0.0917
		1.3964	0.00873			1.3964	0.01441			1.3964	0.01059			1.3964	0.09203
		1.4014	0.00876			1.4014	0.01445			1.4014	0.01063			1.4014	0.09235
		1.40641	0.00879			1.40641	0.0145			1.40641	0.01066			1.40641	0.09268
		1.41141	0.00882			1.41141	0.01455			1.41141	0.0107			1.41141	0.093
		1.41642	0.00885			1.41642	0.0146			1.41642	0.01073			1.41642	0.09332
		1.42142	0.00888			1.42142	0.01464			1.42142	0.01077			1.42142	0.09365
		1.42643	0.00891			1.42643	0.01469			1.42643	0.0108			1.42643	0.09397
		1.43143	0.00894			1.43143	0.01474			1.43143	0.01084			1.43143	0.0943
		1.43644	0.00897			1.43644	0.01479			1.43644	0.01087			1.43644	0.09462
		1.44144	0.009			1.44144	0.01484			1.44144	0.01091			1.44144	0.09495
		1.44645	0.00903			1.44645	0.01488			1.44645	0.01094			1.44645	0.09527
		1.45145	0.00906			1.45145	0.01493			1.45145	0.01098			1.45145	0.09559
		1.45646	0.00909			1.45646	0.01498			1.45646	0.01101			1.45646	0.09592
		1.46146	0.00912			1.46146	0.01503			1.46146	0.01105			1.46146	0.09624
		1.46647	0.00915			1.46647	0.01507			1.46647	0.01108			1.46647	0.09657
		1.47147	0.00918			1.47147	0.01512			1.47147	0.01112			1.47147	0.09689
		1.47648	0.00921			1.47648	0.01517			1.47648	0.01115			1.47648	0.09722
		1.48148	0.00924			1.48148	0.01522			1.48148	0.01119			1.48148	0.09754
		1.48649	0.00927			1.48649	0.01526			1.48649	0.01122			1.48649	0.09786
		1.49149	0.0093			1.49149	0.01531			1.49149	0.01126			1.49149	0.09819
		1.4965	0.00933			1.4965	0.01536			1.4965	0.01129			1.4965	0.09851
		1.5015	0.00936			1.5015	0.01541			1.5015	0.01133			1.5015	0.09884
		1.50651	0.00939			1.50651	0.01545			1.50651	0.01136			1.50651	0.09916
		1.51151	0.00942			1.51151	0.0155			1.51151	0.0114			1.51151	0.09949
		1.51652	0.00945			1.51652	0.01555			1.51652	0.01143			1.51652	0.09981
		1.52152	0.00948			1.52152	0.0156			1.52152	0.01147			1.52152	0.10013
		1.52653	0.00951			1.52653	0.01564			1.52653	0.0115			1.52653	0.10046
		1.53153	0.00954			1.53153	0.01569			1.53153	0.01154			1.53153	0.10078
		1.53654	0.00957			1.53654	0.01574			1.53654	0.01157			1.53654	0.10111
		1.54154	0.0096			1.54154	0.01579			1.54154	0.01161			1.54154	0.10143
		1.54655	0.00963			1.54655	0.01584			1.54655	0.01165			1.54655	0.10176
		1.55155	0.00966			1.55155	0.01588			1.55155	0.01168			1.55155	0.10208
		1.55656	0.00969			1.55656	0.01593			1.55656	0.01172			1.55656	0.1024
		1.56156	0.00972			1.56156	0.01598			1.56156	0.01175			1.56156	0.10273
		1.56657	0.00975			1.56657	0.01603			1.56657	0.01179			1.56657	0.10305
		1.57157	0.00978			1.57157	0.01607			1.57157	0.01182			1.57157	0.10338
		1.57658	0.00981			1.57658	0.01612			1.57658	0.01186			1.57658	0.1037
		1.58158	0.00984			1.58158	0.01617			1.58158	0.01189			1.58158	0.10403
		1.58659	0.00987			1.58659	0.01622			1.58659	0.01193			1.58659	0.10435
		1.59159	0.0099			1.59159	0.01626			1.59159	0.01196			1.59159	0.10468
		1.5966	0.00993			1.5966	0.01631			1.5966	0.012			1.5966	0.105
		1.6016	0.00996			1.6016	0.01636			1.6016	0.01203			1.6016	0.10532
		1.60661	0.00999			1.60661	0.01641			1.60661	0.01207			1.60661	0.10565
		1.61161	0.01002			1.61161	0.01645			1.61161	0.0121			1.61161	0.10597
		1.61662	0.01006			1.61662	0.0165			1.61662	0.01214			1.61662	0.1063
		1.62162	0.01009			1.62162	0.01655			1.62162	0.01217			1.62162	0.10662
		1.62663	0.01012			1.62663	0.0166			1.62663	0.01221			1.62663	0.10695
		1.63163	0.01015			1.63163	0.01665			1.63163	0.01224			1.63163	0.10727
		1.63664	0.01018			1.63664	0.01669			1.63664	0.01228			1.63664	0.10759
		1.64164	0.01021			1.64164	0.01674			1.64164	0.01231			1.64164	0.10792
		1.64665	0.01024			1.64665	0.01679			1.64665	0.01235			1.64665	0.10824
		1.65165	0.01027			1.65165	0.01684			1.65165	0.01238			1.65165	0.10857
		1.65666	0.0103			1.65666	0.01688			1.65666	0.01242			1.65666	0.10889
		1.66166	0.01033			1.66166	0.01693			1.66166	0.01245			1.66166	0.10922
		1.66667	0.01036			1.66667	0.01698			1.66667	0.01249			1.66667	0.10954
		1.67167	0.01039			1.67167	0.01703			1.67167	0.01252			1.67167	0.10986
		1.67668	0.01042			1.67668	0.01707			1.67668	0.01256			1.67668	0.11019
		1.68168	0.01045			1.68168	0.01712			1.68168	0.01259			1.68168	0.11051
		1.68669	0.01048			1.68669	0.01717			1.68669	0.01263			1.68669	0.11084
		1.69169	0.01051			1.69169	0.01722			1.69169	0.01267			1.69169	0.11116
		1.6967	0.01054			1.6967	0.01726			1.6967	0.0127			1.6967	0.11149
		1.7017	0.01057			1.7017	0.01731			1.7017	0.01274			1.7017	0.11181
		1.70671	0.0106			1.70671	0.01736			1.70671	0.01277			1.70671	0.11213
		1.71171	0.01063			1.71171	0.01741			1.71171	0.01281			1.71171	0.11246
		1.71672	0.01066			1.71672	0.01745			1.71672	0.01284			1.71672	0.11278
		1.72172	0.01069			1.72172	0.0175			1.72172	0.01288			1.72172	0.11311
		1.72673	0.01072			1.72673	0.01755			1.72673	0.01291			1.72673	0.11343
		1.73173	0.01075			1.73173	0.0176			1.73173	0.01295			1.73173	0.11376
		1.73674	0.01078			1.73674	0.01765			1.73674	0.01298			1.73674	0.11408
		1.74174	0.01081			1.74174	0.01769			1.74174	0.01302			1.74174	0.11441
		1.74675	0.01084			1.74675	0.01774			1.74675	0.01305			1.74675	0.11473
		1.75175	0.01087			1.75175	0.01779			1.75175	0.01309			1.75175	0.11505
		1.75676	0.0109			1.75676	0.01784			1.75676	0.01312			1.75676	0.11538
		1.76176	0.01093			1.76176	0.01788			1.76176	0.01316			1.76176	0.1157
		1.76677	0.01096			1.76677	0.01793			1.76677	0.01319			1.76677	0.11603
		1.77177	0.01099			1.77177	0.01798			1.77177	0.01323			1.77177	0.11635
		1.77678	0.01102			1.77678	0.01803			1.77678	0.01326			1.77678	0.11668
		1.78178	0.01105			1.78178	0.01807			1.78178	0.0133			1.78178	0.117
		1.78679	0.01108			1.78679	0.01812			1.78679	0.01333			1.78679	0.11732
		1.79179	0.01111			1.79179	0.01817			1.79179	0.01337			1.79179	0.11765
		1.7968	0.01114			1.7968	0.01822			1.7968	0.0134			1.7968	0.11797
		1.8018	0.01117			1.8018	0.01826			1.8018	0.01344			1.8018	0.1183
		1.80681	0.0112			1.80681	0.01831			1.80681	0.01347			1.80681	0.11862
		1.81181	0.01123			1.81181	0.01836			1.81181	0.01351			1.81181	0.11895
		1.81682	0.01126			1.81682	0.01841			1.81682	0.01354			1.81682	0.11927
		1.82182	0.01129			1.82182	0.01845			1.82182	0.01358			1.82182	0.11959
		1.82683	0.01132			1.82683	0.0185			1.82683	0.01361			1.82683	0.11992
		1.83183	0.01135			1.83183	0.01855			1.83183	0.01365			1.83183	0.12024
		1.83684	0.01138			1.83684	0.0186			1.83684	0.01368			1.83684	0.12057
		1.84184	0.01141			1.84184	0.01865			1.84184	0.01372			1.84184	0.12089
		1.84685	0.01144			1.84685	0.01869			1.84685	0.01376			1.84685	0.12122
		1.85185	0.01147			1.85185	0.01874			1.85185	0.01379			1.85185	0.12154
		1.85686	0.0115			1.85686	0.01879			1.85686	0.01383			1.85686	0.12186
		1.86186	0.01153			1.86186	0.01884			1.86186	0.01386			1.86186	0.12219
		1.86687	0.01156			1.86687	0.01888			1.86687	0.0139			1.86687	0.12251
		1.87187	0.01159			1.87187	0.01893			1.87187	0.01393			1.87187	0.12284
		1.87688	0.01163			1.87688	0.01898			1.87688	0.01397			1.87688	0.12316
		1.88188	0.01166			1.88188	0.01903			1.88188	0.014			1.88188	0.12349
		1.88689	0.01169			1.88689	0.01907			1.88689	0.01404			1.88689	0.12381
		1.89189	0.01172			1.89189	0.01912			1.89189	0.01407			1.89189	0.12413
		1.8969	0.01175			1.8969	0.01917			1.8969	0.01411			1.8969	0.12446
		1.9019	0.01178			1.9019	0.01922			1.9019	0.01414			1.9019	0.12478
		1.90691	0.01181			1.90691	0.01926			1.90691	0.01418			1.90691	0.12511
		1.91191	0.01184			1.91191	0.01931			1.91191	0.01421			1.91191	0.12543
		1.91692	0.01187			1.91692	0.01936			1.91692	0.01425			1.91692	0.12576
		1.92192	0.0119			1.92192	0.01941			1.92192	0.01428			1.92192	0.12608
		1.92693	0.01193			1.92693	0.01946			1.92693	0.01432			1.92693	0.12641
		1.93193	0.01196			1.93193	0.0195			1.93193	0.01435			1.93193	0.12673
		1.93694	0.01199			1.93694	0.01955			1.93694	0.01439			1.93694	0.12705
		1.94194	0.01202			1.94194	0.0196			1.94194	0.01442			1.94194	0.12738
		1.94695	0.01205			1.94695	0.01965			1.94695	0.01446			1.94695	0.1277
		1.95195	0.01208			1.95195	0.01969			1.95195	0.01449			1.95195	0.12803
		1.95696	0.01211			1.95696	0.01974			1.95696	0.01453			1.95696	0.12835
		1.96196	0.01214			1.96196	0.01979			1.96196	0.01456			1.96196	0.12868
		1.96697	0.01217			1.96697	0.01984			1.96697	0.0146			1.96697	0.129
		1.97197	0.0122			1.97197	0.01988			1.97197	0.01463			1.97197	0.12932
		1.97698	0.01223			1.97698	0.01993			1.97698	0.01467			1.97698	0.12965
		1.98198	0.01226			1.98198	0.01998			1.98198	0.0147			1.98198	0.12997
		1.98699	0.01229			1.98699	0.02003			1.98699	0.01474			1.98699	0.1303
		1.99199	0.01232			1.99199	0.02007			1.99199	0.01478			1.99199	0.13062
		1.997	0.01235			1.997	0.02012			1.997	0.01481			1.997	0.13095
		2.002	0.01238			2.002	0.02017			2.002	0.01485			2.002	0.13127
		2.00701	0.01241			2.00701	0.02022			2.00701	0.01488			2.00701	0.13159
		2.01201	0.01244			2.01201	0.02026			2.01201	0.01492			2.01201	0.13192
		2.01702	0.01247			2.01702	0.02031			2.01702	0.01495			2.01702	0.13224
		2.02202	0.0125			2.02202	0.02036			2.02202	0.01499			2.02202	0.13257
		2.02703	0.01253			2.02703	0.02041			2.02703	0.01502			2.02703	0.13289
		2.03203	0.01256			2.03203	0.02046			2.03203	0.01506			2.03203	0.13322
		2.03704	0.01259			2.03704	0.0205			2.03704	0.01509			2.03704	0.13354
		2.04204	0.01262			2.04204	0.02055			2.04204	0.01513			2.04204	0.13386
		2.04705	0.01265			2.04705	0.0206			2.04705	0.01516			2.04705	0.13419
		2.05205	0.01268			2.05205	0.02065			2.05205	0.0152			2.05205	0.13451
		2.05706	0.01271			2.05706	0.02069			2.05706	0.01523			2.05706	0.13484
		2.06206	0.01274			2.06206	0.02074			2.06206	0.01527			2.06206	0.13516
		2.06707	0.01277			2.06707	0.02079			2.06707	0.0153			2.06707	0.13549
		2.07207	0.0128			2.07207	0.02084			2.07207	0.01534			2.07207	0.13581
		2.07708	0.01283			2.07708	0.02088			2.07708	0.01537			2.07708	0.13613
		2.08208	0.01286			2.08208	0.02093			2.08208	0.01541			2.08208	0.13646
		2.08709	0.01289			2.08709	0.02098			2.08709	0.01544			2.08709	0.13678
		2.09209	0.01292			2.09209	0.02103			2.09209	0.01548			2.09209	0.13711
		2.0971	0.01295			2.0971	0.02107			2.0971	0.01551			2.0971	0.13743
		2.1021	0.01298			2.1021	0.02112			2.1021	0.01555			2.1021	0.13776
		2.10711	0.01301			2.10711	0.02117			2.10711	0.01558			2.10711	0.13808
		2.11211	0.01304			2.11211	0.02122			2.11211	0.01562			2.11211	0.13841
		2.11712	0.01307			2.11712	0.02126			2.11712	0.01565			2.11712	0.13873
		2.12212	0.0131			2.12212	0.02131			2.12212	0.01569			2.12212	0.13905
		2.12713	0.01313			2.12713	0.02136			2.12713	0.01572			2.12713	0.13938
		2.13213	0.01316			2.13213	0.02141			2.13213	0.01576			2.13213	0.1397
		2.13714	0.0132			2.13714	0.02146			2.13714	0.0158			2.13714	0.14003
		2.14214	0.01323			2.14214	0.0215			2.14214	0.01583			2.14214	0.14035
		2.14715	0.01326			2.14715	0.02155			2.14715	0.01587			2.14715	0.14068
		2.15215	0.01329			2.15215	0.0216			2.15215	0.0159			2.15215	0.141
		2.15716	0.01332			2.15716	0.02165			2.15716	0.01594			2.15716	0.14132
		2.16216	0.01335			2.16216	0.02169			2.16216	0.01597			2.16216	0.14165
		2.16717	0.01338			2.16717	0.02174			2.16717	0.01601			2.16717	0.14197
		2.17217	0.01341			2.17217	0.02179			2.17217	0.01604			2.17217	0.1423
		2.17718	0.01344			2.17718	0.02184			2.17718	0.01608			2.17718	0.14262
		2.18218	0.01347			2.18218	0.02188			2.18218	0.01611			2.18218	0.14295
		2.18719	0.0135			2.18719	0.02193			2.18719	0.01615			2.18719	0.14327
		2.19219	0.01353			2.19219	0.02198			2.19219	0.01618			2.19219	0.14359
		2.1972	0.01356			2.1972	0.02203			2.1972	0.01622			2.1972	0.14392
		2.2022	0.01359			2.2022	0.02207			2.2022	0.01625			2.2022	0.14424
		2.20721	0.01362			2.20721	0.02212			2.20721	0.01629			2.20721	0.14457
		2.21221	0.01365			2.21221	0.02217			2.21221	0.01632			2.21221	0.14489
		2.21722	0.01368			2.21722	0.02222			2.21722	0.01636			2.21722	0.14522
		2.22222	0.01371			2.22222	0.02227			2.22222	0.01639			2.22222	0.14554
		2.22723	0.01374			2.22723	0.02231			2.22723	0.01643			2.22723	0.14586
		2.23223	0.01377			2.23223	0.02236			2.23223	0.01646			2.23223	0.14619
		2.23724	0.0138			2.23724	0.02241			2.23724	0.0165			2.23724	0.14651
		2.24224	0.01383			2.24224	0.02246			2.24224	0.01653			2.24224	0.14684
		2.24725	0.01386			2.24725	0.0225			2.24725	0.01657			2.24725	0.14716
		2.25225	0.01389			2.25225	0.02255			2.25225	0.0166			2.25225	0.14749
		2.25726	0.01392			2.25726	0.0226			2.25726	0.01664			2.25726	0.14781
		2.26226	0.01395			2.26226	0.02265			2.26226	0.01667			2.26226	0.14814
		2.26727	0.01398			2.26727	0.02269			2.26727	0.01671			2.26727	0.14846
		2.27227	0.01401			2.27227	0.02274			2.27227	0.01674			2.27227	0.14878
		2.27728	0.01404			2.27728	0.02279			2.27728	0.01678			2.27728	0.14911
		2.28228	0.01407			2.28228	0.02284			2.28228	0.01682			2.28228	0.14943
		2.28729	0.0141			2.28729	0.02288			2.28729	0.01685			2.28729	0.14976
		2.29229	0.01413			2.29229	0.02293			2.29229	0.01689			2.29229	0.15008
		2.2973	0.01416			2.2973	0.02298			2.2973	0.01692			2.2973	0.15041
		2.3023	0.01419			2.3023	0.02303			2.3023	0.01696			2.3023	0.15073
		2.30731	0.01422			2.30731	0.02307			2.30731	0.01699			2.30731	0.15105
		2.31231	0.01425			2.31231	0.02312			2.31231	0.01703			2.31231	0.15138
		2.31732	0.01428			2.31732	0.02317			2.31732	0.01706			2.31732	0.1517
		2.32232	0.01431			2.32232	0.02322			2.32232	0.0171			2.32232	0.15203
		2.32733	0.01434			2.32733	0.02327			2.32733	0.01713			2.32733	0.15235
		2.33233	0.01437			2.33233	0.02331			2.33233	0.01717			2.33233	0.15268
		2.33734	0.0144			2.33734	0.02336			2.33734	0.0172			2.33734	0.153
		2.34234	0.01443			2.34234	0.02341			2.34234	0.01724			2.34234	0.15332
		2.34735	0.01446			2.34735	0.02346			2.34735	0.01727			2.34735	0.15365
		2.35235	0.01449			2.35235	0.0235			2.35235	0.01731			2.35235	0.15397
		2.35736	0.01452			2.35736	0.02355			2.35736	0.01734			2.35736	0.1543
		2.36236	0.01455			2.36236	0.0236			2.36236	0.01738			2.36236	0.15462
		2.36737	0.01458			2.36737	0.02365			2.36737	0.01741			2.36737	0.15495
		2.37237	0.01461			2.37237	0.02369			2.37237	0.01745			2.37237	0.15527
		2.37738	0.01464			2.37738	0.02374			2.37738	0.01748			2.37738	0.15559
		2.38238	0.01467			2.38238	0.02379			2.38238	0.01752			2.38238	0.15592
		2.38739	0.0147			2.38739	0.02384			2.38739	0.01755			2.38739	0.15624
		2.39239	0.01474			2.39239	0.02388			2.39239	0.01759			2.39239	0.15657
		2.3974	0.01477			2.3974	0.02393			2.3974	0.01762			2.3974	0.15689
		2.4024	0.0148			2.4024	0.02398			2.4024	0.01766			2.4024	0.15722
		2.40741	0.01483			2.40741	0.02403			2.40741	0.01769			2.40741	0.15754
		2.41241	0.01486			2.41241	0.02407			2.41241	0.01773			2.41241	0.15786
		2.41742	0.01489			2.41742	0.02412			2.41742	0.01776			2.41742	0.15819
		2.42242	0.01492			2.42242	0.02417			2.42242	0.0178			2.42242	0.15851
		2.42743	0.01495			2.42743	0.02422			2.42743	0.01783			2.42743	0.15884
		2.43243	0.01498			2.43243	0.02427			2.43243	0.01787			2.43243	0.15916
		2.43744	0.01501			2.43744	0.02431			2.43744	0.01791			2.43744	0.15949
		2.44244	0.01504			2.44244	0.02436			2.44244	0.01794			2.44244	0.15981
		2.44745	0.01507			2.44745	0.02441			2.44745	0.01798			2.44745	0.16014
		2.45245	0.0151			2.45245	0.02446			2.45245	0.01801			2.45245	0.16046
		2.45746	0.01513			2.45746	0.0245			2.45746	0.01805			2.45746	0.16078
		2.46246	0.01516			2.46246	0.02455			2.46246	0.01808			2.46246	0.16111
		2.46747	0.01519			2.46747	0.0246			2.46747	0.01812			2.46747	0.16143
		2.47247	0.01522			2.47247	0.02465			2.47247	0.01815			2.47247	0.16176
		2.47748	0.01525			2.47748	0.02469			2.47748	0.01819			2.47748	0.16208
		2.48248	0.01528			2.48248	0.02474			2.48248	0.01822			2.48248	0.16241
		2.48749	0.01531			2.48749	0.02479			2.48749	0.01826			2.48749	0.16273
		2.49249	0.01534			2.49249	0.02484			2.49249	0.01829			2.49249	0.16305
		2.4975	0.01537			2.4975	0.02488			2.4975	0.01833			2.4975	0.16338
		2.5025	0.0154			2.5025	0.02493			2.5025	0.01836			2.5025	0.1637
		2.50751	0.01543			2.50751	0.02498			2.50751	0.0184			2.50751	0.16403
		2.51251	0.01546			2.51251	0.02503			2.51251	0.01843			2.51251	0.16435
		2.51752	0.01549			2.51752	0.02508			2.51752	0.01847			2.51752	0.16468
		2.52252	0.01552			2.52252	0.02512			2.52252	0.0185			2.52252	0.165
		2.52753	0.01555			2.52753	0.02517			2.52753	0.01854			2.52753	0.16532
		2.53253	0.01558			2.53253	0.02522			2.53253	0.01857			2.53253	0.16565
		2.53754	0.01561			2.53754	0.02527			2.53754	0.01861			2.53754	0.16597
		2.54254	0.01564			2.54254	0.02531			2.54254	0.01864			2.54254	0.1663
		2.54755	0.01567			2.54755	0.02536			2.54755	0.01868			2.54755	0.16662
		2.55255	0.0157			2.55255	0.02541			2.55255	0.01871			2.55255	0.16695
		2.55756	0.01573			2.55756	0.02546			2.55756	0.01875			2.55756	0.16727
		2.56256	0.01576			2.56256	0.0255			2.56256	0.01878			2.56256	0.16759
		2.56757	0.01579			2.56757	0.02555			2.56757	0.01882			2.56757	0.16792
		2.57257	0.01582			2.57257	0.0256			2.57257	0.01885			2.57257	0.16824
		2.57758	0.01585			2.57758	0.02565			2.57758	0.01889			2.57758	0.16857
		2.58258	0.01588			2.58258	0.02569			2.58258	0.01893			2.58258	0.16889
		2.58759	0.01591			2.58759	0.02574			2.58759	0.01896			2.58759	0.16922
		2.59259	0.01594			2.59259	0.02579			2.59259	0.019			2.59259	0.16954
		2.5976	0.01597			2.5976	0.02584			2.5976	0.01903			2.5976	0.16986
		2.6026	0.016			2.6026	0.02588			2.6026	0.01907			2.6026	0.17019
		2.60761	0.01603			2.60761	0.02593			2.60761	0.0191			2.60761	0.17051
		2.61261	0.01606			2.61261	0.02598			2.61261	0.01914			2.61261	0.17084
		2.61762	0.01609			2.61762	0.02603			2.61762	0.01917			2.61762	0.17116
		2.62262	0.01612			2.62262	0.02608			2.62262	0.01921			2.62262	0.17149
		2.62763	0.01615			2.62763	0.02612			2.62763	0.01924			2.62763	0.17181
		2.63263	0.01618			2.63263	0.02617			2.63263	0.01928			2.63263	0.17214
		2.63764	0.01621			2.63764	0.02622			2.63764	0.01931			2.63764	0.17246
		2.64264	0.01624			2.64264	0.02627			2.64264	0.01935			2.64264	0.17278
		2.64765	0.01627			2.64765	0.02631			2.64765	0.01938			2.64765	0.17311
		2.65265	0.01631			2.65265	0.02636			2.65265	0.01942			2.65265	0.17343
		2.65766	0.01634			2.65766	0.02641			2.65766	0.01945			2.65766	0.17376
		2.66266	0.01637			2.66266	0.02646			2.66266	0.01949			2.66266	0.17408
		2.66767	0.0164			2.66767	0.0265			2.66767	0.01952			2.66767	0.17441
		2.67267	0.01643			2.67267	0.02655			2.67267	0.01956			2.67267	0.17473
		2.67768	0.01646			2.67768	0.0266			2.67768	0.01959			2.67768	0.17505
		2.68268	0.01649			2.68268	0.02665			2.68268	0.01963			2.68268	0.17538
		2.68769	0.01652			2.68769	0.02669			2.68769	0.01966			2.68769	0.1757
		2.69269	0.01655			2.69269	0.02674			2.69269	0.0197			2.69269	0.17603
		2.6977	0.01658			2.6977	0.02679			2.6977	0.01973			2.6977	0.17635
		2.7027	0.01661			2.7027	0.02684			2.7027	0.01977			2.7027	0.17668
		2.70771	0.01664			2.70771	0.02688			2.70771	0.0198			2.70771	0.177
		2.71271	0.01667			2.71271	0.02693			2.71271	0.01984			2.71271	0.17732
		2.71772	0.0167			2.71772	0.02698			2.71772	0.01987			2.71772	0.17765
		2.72272	0.01673			2.72272	0.02703			2.72272	0.01991			2.72272	0.17797
		2.72773	0.01676			2.72773	0.02708			2.72773	0.01995			2.72773	0.1783
		2.73273	0.01679			2.73273	0.02712			2.73273	0.01998			2.73273	0.17862
		2.73774	0.01682			2.73774	0.02717			2.73774	0.02002			2.73774	0.17895
		2.74274	0.01685			2.74274	0.02722			2.74274	0.02005			2.74274	0.17927
		2.74775	0.01688			2.74775	0.02727			2.74775	0.02009			2.74775	0.17959
		2.75275	0.01691			2.75275	0.02731			2.75275	0.02012			2.75275	0.17992
		2.75776	0.01694			2.75776	0.02736			2.75776	0.02016			2.75776	0.18024
		2.76276	0.01697			2.76276	0.02741			2.76276	0.02019			2.76276	0.18057
		2.76777	0.017			2.76777	0.02746			2.76777	0.02023			2.76777	0.18089
		2.77277	0.01703			2.77277	0.0275			2.77277	0.02026			2.77277	0.18122
		2.77778	0.01706			2.77778	0.02755			2.77778	0.0203			2.77778	0.18154
		2.78278	0.01709			2.78278	0.0276			2.78278	0.02033			2.78278	0.18187
		2.78779	0.01712			2.78779	0.02765			2.78779	0.02037			2.78779	0.18219
		2.79279	0.01715			2.79279	0.02769			2.79279	0.0204			2.79279	0.18251
		2.7978	0.01718			2.7978	0.02774			2.7978	0.02044			2.7978	0.18284
		2.8028	0.01721			2.8028	0.02779			2.8028	0.02047			2.8028	0.18316
		2.80781	0.01724			2.80781	0.02784			2.80781	0.02051			2.80781	0.18349
		2.81281	0.01727			2.81281	0.02789			2.81281	0.02054			2.81281	0.18381
		2.81782	0.0173			2.81782	0.02793			2.81782	0.02058			2.81782	0.18414
		2.82282	0.01733			2.82282	0.02798			2.82282	0.02061			2.82282	0.18446
		2.82783	0.01736			2.82783	0.02803			2.82783	0.02065			2.82783	0.18478
		2.83283	0.01739			2.83283	0.02808			2.83283	0.02068			2.83283	0.18511
		2.83784	0.01742			2.83784	0.02812			2.83784	0.02072			2.83784	0.18543
		2.84284	0.01745			2.84284	0.02817			2.84284	0.02075			2.84284	0.18576
		2.84785	0.01748			2.84785	0.02822			2.84785	0.02079			2.84785	0.18608
		2.85285	0.01751			2.85285	0.02827			2.85285	0.02082			2.85285	0.18641
		2.85786	0.01754			2.85786	0.02831			2.85786	0.02086			2.85786	0.18673
		2.86286	0.01757			2.86286	0.02836			2.86286	0.02089			2.86286	0.18705
		2.86787	0.0176			2.86787	0.02841			2.86787	0.02093			2.86787	0.18738
		2.87287	0.01763			2.87287	0.02846			2.87287	0.02097			2.87287	0.1877
		2.87788	0.01766			2.87788	0.0285			2.87788	0.021			2.87788	0.18803
		2.88288	0.01769			2.88288	0.02855			2.88288	0.02104			2.88288	0.18835
		2.88789	0.01772			2.88789	0.0286			2.88789	0.02107			2.88789	0.18868
		2.89289	0.01775			2.89289	0.02865			2.89289	0.02111			2.89289	0.189
		2.8979	0.01778			2.8979	0.02869			2.8979	0.02114			2.8979	0.18932
		2.9029	0.01781			2.9029	0.02874			2.9029	0.02118			2.9029	0.18965
		2.90791	0.01784			2.90791	0.02879			2.90791	0.02121			2.90791	0.18997
		2.91291	0.01788			2.91291	0.02884			2.91291	0.02125			2.91291	0.1903
		2.91792	0.01791			2.91792	0.02889			2.91792	0.02128			2.91792	0.19062
		2.92292	0.01794			2.92292	0.02893			2.92292	0.02132			2.92292	0.19095
		2.92793	0.01797			2.92793	0.02898			2.92793	0.02135			2.92793	0.19127
		2.93293	0.018			2.93293	0.02903			2.93293	0.02139			2.93293	0.19159
		2.93794	0.01803			2.93794	0.02908			2.93794	0.02142			2.93794	0.19192
		2.94294	0.01806			2.94294	0.02912			2.94294	0.02146			2.94294	0.19224
		2.94795	0.01809			2.94795	0.02917			2.94795	0.02149			2.94795	0.19257
		2.95295	0.01812			2.95295	0.02922			2.95295	0.02153			2.95295	0.19289
		2.95796	0.01815			2.95796	0.02927			2.95796	0.02156			2.95796	0.19322
		2.96296	0.01818			2.96296	0.02931			2.96296	0.0216			2.96296	0.19354
		2.96797	0.01821			2.96797	0.02936			2.96797	0.02163			2.96797	0.19387
		2.97297	0.01824			2.97297	0.02941			2.97297	0.02167			2.97297	0.19419
		2.97798	0.01827			2.97798	0.02946			2.97798	0.0217			2.97798	0.19451
		2.98298	0.0183			2.98298	0.0295			2.98298	0.02174			2.98298	0.19484
		2.98799	0.01833			2.98799	0.02955			2.98799	0.02177			2.98799	0.19516
		2.99299	0.01836			2.99299	0.0296			2.99299	0.02181			2.99299	0.19549
		2.998	0.01839			2.998	0.02965			2.998	0.02184			2.998	0.19581
		3.003	0.01842			3.003	0.0297			3.003	0.02188			3.003	0.19614
		3.00801	0.01845			3.00801	0.02974			3.00801	0.02191			3.00801	0.19646
		3.01301	0.01848			3.01301	0.02979			3.01301	0.02195			3.01301	0.19678
		3.01802	0.01851			3.01802	0.02984			3.01802	0.02198			3.01802	0.19711
		3.02302	0.01854			3.02302	0.02989			3.02302	0.02202			3.02302	0.19743
		3.02803	0.01857			3.02803	0.02993			3.02803	0.02206			3.02803	0.19776
		3.03303	0.0186			3.03303	0.02998			3.03303	0.02209			3.03303	0.19808
		3.03804	0.01863			3.03804	0.03003			3.03804	0.02213			3.03804	0.19841
		3.04304	0.01866			3.04304	0.03008			3.04304	0.02216			3.04304	0.19873
		3.04805	0.01869			3.04805	0.03012			3.04805	0.0222			3.04805	0.19905
		3.05305	0.01872			3.05305	0.03017			3.05305	0.02223			3.05305	0.19938
		3.05806	0.01875			3.05806	0.03022			3.05806	0.02227			3.05806	0.1997
		3.06306	0.01878			3.06306	0.03027			3.06306	0.0223			3.06306	0.20003
		3.06807	0.01881			3.06807	0.03031			3.06807	0.02234			3.06807	0.20035
		3.07307	0.01884			3.07307	0.03036			3.07307	0.02237			3.07307	0.20068
		3.07808	0.01887			3.07808	0.03041			3.07808	0.02241			3.07808	0.201
		3.08308	0.0189			3.08308	0.03046			3.08308	0.02244			3.08308	0.20132
		3.08809	0.01893			3.08809	0.0305			3.08809	0.02248			3.08809	0.20165
		3.09309	0.01896			3.09309	0.03055			3.09309	0.02251			3.09309	0.20197
		3.0981	0.01899			3.0981	0.0306			3.0981	0.02255			3.0981	0.2023
		3.1031	0.01902			3.1031	0.03065			3.1031	0.02258			3.1031	0.20262
		3.10811	0.01905			3.10811	0.0307			3.10811	0.02262			3.10811	0.20295
		3.11311	0.01908			3.11311	0.03074			3.11311	0.02265			3.11311	0.20327
		3.11812	0.01911			3.11812	0.03079			3.11812	0.02269			3.11812	0.20359
		3.12312	0.01914			3.12312	0.03084			3.12312	0.02272			3.12312	0.20392
		3.12813	0.01917			3.12813	0.03089			3.12813	0.02276			3.12813	0.20424
		3.13313	0.0192			3.13313	0.03093			3.13313	0.02279			3.13313	0.20457
		3.13814	0.01923			3.13814	0.03098			3.13814	0.02283			3.13814	0.20489
		3.14314	0.01926			3.14314	0.03103			3.14314	0.02286			3.14314	0.20522
		3.14815	0.01929			3.14815	0.03108			3.14815	0.0229			3.14815	0.20554
		3.15315	0.01932			3.15315	0.03112			3.15315	0.02293			3.15315	0.20587
		3.15816	0.01935			3.15816	0.03117			3.15816	0.02297			3.15816	0.20619
		3.16316	0.01938			3.16316	0.03122			3.16316	0.023			3.16316	0.20651
		3.16817	0.01941			3.16817	0.03127			3.16817	0.02304			3.16817	0.20684
		3.17317	0.01945			3.17317	0.03131			3.17317	0.02308			3.17317	0.20716
		3.17818	0.01948			3.17818	0.03136			3.17818	0.02311			3.17818	0.20749
		3.18318	0.01951			3.18318	0.03141			3.18318	0.02315			3.18318	0.20781
		3.18819	0.01954			3.18819	0.03146			3.18819	0.02318			3.18819	0.20814
		3.19319	0.01957			3.19319	0.0315			3.19319	0.02322			3.19319	0.20846
		3.1982	0.0196			3.1982	0.03155			3.1982	0.02325			3.1982	0.20878
		3.2032	0.01963			3.2032	0.0316			3.2032	0.02329			3.2032	0.20911
		3.20821	0.01966			3.20821	0.03165			3.20821	0.02332			3.20821	0.20943
		3.21321	0.01969			3.21321	0.0317			3.21321	0.02336			3.21321	0.20976
		3.21822	0.01972			3.21822	0.03174			3.21822	0.02339			3.21822	0.21008
		3.22322	0.01975			3.22322	0.03179			3.22322	0.02343			3.22322	0.21041
		3.22823	0.01978			3.22823	0.03184			3.22823	0.02346			3.22823	0.21073
		3.23323	0.01981			3.23323	0.03189			3.23323	0.0235			3.23323	0.21105
		3.23824	0.01984			3.23824	0.03193			3.23824	0.02353			3.23824	0.21138
		3.24324	0.01987			3.24324	0.03198			3.24324	0.02357			3.24324	0.2117
		3.24825	0.0199			3.24825	0.03203			3.24825	0.0236			3.24825	0.21203
		3.25325	0.01993			3.25325	0.03208			3.25325	0.02364			3.25325	0.21235
		3.25826	0.01996			3.25826	0.03212			3.25826	0.02367			3.25826	0.21268
		3.26326	0.01999			3.26326	0.03217			3.26326	0.02371			3.26326	0.213
		3.26827	0.02002			3.26827	0.03222			3.26827	0.02374			3.26827	0.21332
		3.27327	0.02005			3.27327	0.03227			3.27327	0.02378			3.27327	0.21365
		3.27828	0.02008			3.27828	0.03231			3.27828	0.02381			3.27828	0.21397
		3.28328	0.02011			3.28328	0.03236			3.28328	0.02385			3.28328	0.2143
		3.28829	0.02014			3.28829	0.03241			3.28829	0.02388			3.28829	0.21462
		3.29329	0.02017			3.29329	0.03246			3.29329	0.02392			3.29329	0.21495
		3.2983	0.0202			3.2983	0.03251			3.2983	0.02395			3.2983	0.21527
		3.3033	0.02023			3.3033	0.03255			3.3033	0.02399			3.3033	0.2156
		3.30831	0.02026			3.30831	0.0326			3.30831	0.02402			3.30831	0.21592
		3.31331	0.02029			3.31331	0.03265			3.31331	0.02406			3.31331	0.21624
		3.31832	0.02032			3.31832	0.0327			3.31832	0.0241			3.31832	0.21657
		3.32332	0.02035			3.32332	0.03274			3.32332	0.02413			3.32332	0.21689
		3.32833	0.02038			3.32833	0.03279			3.32833	0.02417			3.32833	0.21722
		3.33333	0.02041			3.33333	0.03284			3.33333	0.0242			3.33333	0.21754
		3.33834	0.02044			3.33834	0.03289			3.33834	0.02424			3.33834	0.21787
		3.34334	0.02047			3.34334	0.03293			3.34334	0.02427			3.34334	0.21819
		3.34835	0.0205			3.34835	0.03298			3.34835	0.02431			3.34835	0.21851
		3.35335	0.02053			3.35335	0.03303			3.35335	0.02434			3.35335	0.21884
		3.35836	0.02056			3.35836	0.03308			3.35836	0.02438			3.35836	0.21916
		3.36336	0.02059			3.36336	0.03312			3.36336	0.02441			3.36336	0.21949
		3.36837	0.02062			3.36837	0.03317			3.36837	0.02445			3.36837	0.21981
		3.37337	0.02065			3.37337	0.03322			3.37337	0.02448			3.37337	0.22014
		3.37838	0.02068			3.37838	0.03327			3.37838	0.02452			3.37838	0.22046
		3.38338	0.02071			3.38338	0.03331			3.38338	0.02455			3.38338	0.22078
		3.38839	0.02074			3.38839	0.03336			3.38839	0.02459			3.38839	0.22111
		3.39339	0.02077			3.39339	0.03341			3.39339	0.02462			3.39339	0.22143
		3.3984	0.0208			3.3984	0.03346			3.3984	0.02466			3.3984	0.22176
		3.4034	0.02083			3.4034	0.03351			3.4034	0.02469			3.4034	0.22208
		3.40841	0.02086			3.40841	0.03355			3.40841	0.02473			3.40841	0.22241
		3.41341	0.02089			3.41341	0.0336			3.41341	0.02476			3.41341	0.22273
		3.41842	0.02092			3.41842	0.03365			3.41842	0.0248			3.41842	0.22305
		3.42342	0.02095			3.42342	0.0337			3.42342	0.02483			3.42342	0.22338
		3.42843	0.02098			3.42843	0.03374			3.42843	0.02487			3.42843	0.2237
		3.43343	0.02102			3.43343	0.03379			3.43343	0.0249			3.43343	0.22403
		3.43844	0.02105			3.43844	0.03384			3.43844	0.02494			3.43844	0.22435
		3.44344	0.02108			3.44344	0.03389			3.44344	0.02497			3.44344	0.22468
		3.44845	0.02111			3.44845	0.03393			3.44845	0.02501			3.44845	0.225
		3.45345	0.02114			3.45345	0.03398			3.45345	0.02504			3.45345	0.22532
		3.45846	0.02117			3.45846	0.03403			3.45846	0.02508			3.45846	0.22565
		3.46346	0.0212			3.46346	0.03408			3.46346	0.02512			3.46346	0.22597
		3.46847	0.02123			3.46847	0.03412			3.46847	0.02515			3.46847	0.2263
		3.47347	0.02126			3.47347	0.03417			3.47347	0.02519			3.47347	0.22662
		3.47848	0.02129			3.47848	0.03422			3.47848	0.02522			3.47848	0.22695
		3.48348	0.02132			3.48348	0.03427			3.48348	0.02526			3.48348	0.22727
		3.48849	0.02135			3.48849	0.03431			3.48849	0.02529			3.48849	0.2276
		3.49349	0.02138			3.49349	0.03436			3.49349	0.02533			3.49349	0.22792
		3.4985	0.02141			3.4985	0.03441			3.4985	0.02536			3.4985	0.22824
		3.5035	0.02144			3.5035	0.03446			3.5035	0.0254			3.5035	0.22857
		3.50851	0.02147			3.50851	0.03451			3.50851	0.02543			3.50851	0.22889
		3.51351	0.0215			3.51351	0.03455			3.51351	0.02547			3.51351	0.22922
		3.51852	0.02153			3.51852	0.0346			3.51852	0.0255			3.51852	0.22954
		3.52352	0.02156			3.52352	0.03465			3.52352	0.02554			3.52352	0.22987
		3.52853	0.02159			3.52853	0.0347			3.52853	0.02557			3.52853	0.23019
		3.53353	0.02162			3.53353	0.03474			3.53353	0.02561			3.53353	0.23051
		3.53854	0.02165			3.53854	0.03479			3.53854	0.02564			3.53854	0.23084
		3.54354	0.02168			3.54354	0.03484			3.54354	0.02568			3.54354	0.23116
		3.54855	0.02171			3.54855	0.03489			3.54855	0.02571			3.54855	0.23149
		3.55355	0.02174			3.55355	0.03493			3.55355	0.02575			3.55355	0.23181
		3.55856	0.02177			3.55856	0.03498			3.55856	0.02578			3.55856	0.23214
		3.56356	0.0218			3.56356	0.03503			3.56356	0.02582			3.56356	0.23246
		3.56857	0.02183			3.56857	0.03508			3.56857	0.02585			3.56857	0.23278
		3.57357	0.02186			3.57357	0.03512			3.57357	0.02589			3.57357	0.23311
		3.57858	0.02189			3.57858	0.03517			3.57858	0.02592			3.57858	0.23343
		3.58358	0.02192			3.58358	0.03522			3.58358	0.02596			3.58358	0.23376
		3.58859	0.02195			3.58859	0.03527			3.58859	0.02599			3.58859	0.23408
		3.59359	0.02198			3.59359	0.03532			3.59359	0.02603			3.59359	0.23441
		3.5986	0.02201			3.5986	0.03536			3.5986	0.02606			3.5986	0.23473
		3.6036	0.02204			3.6036	0.03541			3.6036	0.0261			3.6036	0.23505
		3.60861	0.02207			3.60861	0.03546			3.60861	0.02613			3.60861	0.23538
		3.61361	0.0221			3.61361	0.03551			3.61361	0.02617			3.61361	0.2357
		3.61862	0.02213			3.61862	0.03555			3.61862	0.02621			3.61862	0.23603
		3.62362	0.02216			3.62362	0.0356			3.62362	0.02624			3.62362	0.23635
		3.62863	0.02219			3.62863	0.03565			3.62863	0.02628			3.62863	0.23668
		3.63363	0.02222			3.63363	0.0357			3.63363	0.02631			3.63363	0.237
		3.63864	0.02225			3.63864	0.03574			3.63864	0.02635			3.63864	0.23733
		3.64364	0.02228			3.64364	0.03579			3.64364	0.02638			3.64364	0.23765
		3.64865	0.02231			3.64865	0.03584			3.64865	0.02642			3.64865	0.23797
		3.65365	0.02234			3.65365	0.03589			3.65365	0.02645			3.65365	0.2383
		3.65866	0.02237			3.65866	0.03593			3.65866	0.02649			3.65866	0.23862
		3.66366	0.0224			3.66366	0.03598			3.66366	0.02652			3.66366	0.23895
		3.66867	0.02243			3.66867	0.03603			3.66867	0.02656			3.66867	0.23927
		3.67367	0.02246			3.67367	0.03608			3.67367	0.02659			3.67367	0.2396
		3.67868	0.02249			3.67868	0.03612			3.67868	0.02663			3.67868	0.23992
		3.68368	0.02252			3.68368	0.03617			3.68368	0.02666			3.68368	0.24024
		3.68869	0.02255			3.68869	0.03622			3.68869	0.0267			3.68869	0.24057
		3.69369	0.02259			3.69369	0.03627			3.69369	0.02673			3.69369	0.24089
		3.6987	0.02262			3.6987	0.03632			3.6987	0.02677			3.6987	0.24122
		3.7037	0.02265			3.7037	0.03636			3.7037	0.0268			3.7037	0.24154
		3.70871	0.02268			3.70871	0.03641			3.70871	0.02684			3.70871	0.24187
		3.71371	0.02271			3.71371	0.03646			3.71371	0.02687			3.71371	0.24219
		3.71872	0.02274			3.71872	0.03651			3.71872	0.02691			3.71872	0.24251
		3.72372	0.02277			3.72372	0.03655			3.72372	0.02694			3.72372	0.24284
		3.72873	0.0228			3.72873	0.0366			3.72873	0.02698			3.72873	0.24316
		3.73373	0.02283			3.73373	0.03665			3.73373	0.02701			3.73373	0.24349
		3.73874	0.02286			3.73874	0.0367			3.73874	0.02705			3.73874	0.24381
		3.74374	0.02289			3.74374	0.03674			3.74374	0.02708			3.74374	0.24414
		3.74875	0.02292			3.74875	0.03679			3.74875	0.02712			3.74875	0.24446
		3.75375	0.02295			3.75375	0.03684			3.75375	0.02715			3.75375	0.24478
		3.75876	0.02298			3.75876	0.03689			3.75876	0.02719			3.75876	0.24511
		3.76376	0.02301			3.76376	0.03693			3.76376	0.02723			3.76376	0.24543
		3.76877	0.02304			3.76877	0.03698			3.76877	0.02726			3.76877	0.24576
		3.77377	0.02307			3.77377	0.03703			3.77377	0.0273			3.77377	0.24608
		3.77878	0.0231			3.77878	0.03708			3.77878	0.02733			3.77878	0.24641
		3.78378	0.02313			3.78378	0.03712			3.78378	0.02737			3.78378	0.24673
		3.78879	0.02316			3.78879	0.03717			3.78879	0.0274			3.78879	0.24705
		3.79379	0.02319			3.79379	0.03722			3.79379	0.02744			3.79379	0.24738
		3.7988	0.02322			3.7988	0.03727			3.7988	0.02747			3.7988	0.2477
		3.8038	0.02325			3.8038	0.03732			3.8038	0.02751			3.8038	0.24803
		3.80881	0.02328			3.80881	0.03736			3.80881	0.02754			3.80881	0.24835
		3.81381	0.02331			3.81381	0.03741			3.81381	0.02758			3.81381	0.24868
		3.81882	0.02334			3.81882	0.03746			3.81882	0.02761			3.81882	0.249
		3.82382	0.02337			3.82382	0.03751			3.82382	0.02765			3.82382	0.24933
		3.82883	0.0234			3.82883	0.03755			3.82883	0.02768			3.82883	0.24965
		3.83383	0.02343			3.83383	0.0376			3.83383	0.02772			3.83383	0.24997
		3.83884	0.02346			3.83884	0.03765			3.83884	0.02775			3.83884	0.2503
		3.84384	0.02349			3.84384	0.0377			3.84384	0.02779			3.84384	0.25062
		3.84885	0.02352			3.84885	0.03774			3.84885	0.02782			3.84885	0.25095
		3.85385	0.02355			3.85385	0.03779			3.85385	0.02786			3.85385	0.25127
		3.85886	0.02358			3.85886	0.03784			3.85886	0.02789			3.85886	0.2516
		3.86386	0.02361			3.86386	0.03789			3.86386	0.02793			3.86386	0.25192
		3.86887	0.02364			3.86887	0.03793			3.86887	0.02796			3.86887	0.25224
		3.87387	0.02367			3.87387	0.03798			3.87387	0.028			3.87387	0.25257
		3.87888	0.0237			3.87888	0.03803			3.87888	0.02803			3.87888	0.25289
		3.88388	0.02373			3.88388	0.03808			3.88388	0.02807			3.88388	0.25322
		3.88889	0.02376			3.88889	0.03813			3.88889	0.0281			3.88889	0.25354
		3.89389	0.02379			3.89389	0.03817			3.89389	0.02814			3.89389	0.25387
		3.8989	0.02382			3.8989	0.03822			3.8989	0.02817			3.8989	0.25419
		3.9039	0.02385			3.9039	0.03827			3.9039	0.02821			3.9039	0.25451
		3.90891	0.02388			3.90891	0.03832			3.90891	0.02825			3.90891	0.25484
		3.91391	0.02391			3.91391	0.03836			3.91391	0.02828			3.91391	0.25516
		3.91892	0.02394			3.91892	0.03841			3.91892	0.02832			3.91892	0.25549
		3.92392	0.02397			3.92392	0.03846			3.92392	0.02835			3.92392	0.25581
		3.92893	0.024			3.92893	0.03851			3.92893	0.02839			3.92893	0.25614
		3.93393	0.02403			3.93393	0.03855			3.93393	0.02842			3.93393	0.25646
		3.93894	0.02406			3.93894	0.0386			3.93894	0.02846			3.93894	0.25678
		3.94394	0.02409			3.94394	0.03865			3.94394	0.02849			3.94394	0.25711
		3.94895	0.02412			3.94895	0.0387			3.94895	0.02853			3.94895	0.25743
		3.95395	0.02416			3.95395	0.03874			3.95395	0.02856			3.95395	0.25776
		3.95896	0.02419			3.95896	0.03879			3.95896	0.0286			3.95896	0.25808
		3.96396	0.02422			3.96396	0.03884			3.96396	0.02863			3.96396	0.25841
		3.96897	0.02425			3.96897	0.03889			3.96897	0.02867			3.96897	0.25873
		3.97397	0.02428			3.97397	0.03893			3.97397	0.0287			3.97397	0.25905
		3.97898	0.02431			3.97898	0.03898			3.97898	0.02874			3.97898	0.25938
		3.98398	0.02434			3.98398	0.03903			3.98398	0.02877			3.98398	0.2597
		3.98899	0.02437			3.98899	0.03908			3.98899	0.02881			3.98899	0.26003
		3.99399	0.0244			3.99399	0.03913			3.99399	0.02884			3.99399	0.26035
		3.999	0.02443			3.999	0.03917			3.999	0.02888			3.999	0.26068
		4.004	0.02446			4.004	0.03922			4.004	0.02891			4.004	0.261
		4.00901	0.02449			4.00901	0.03927			4.00901	0.02895			4.00901	0.26133
		4.01401	0.02452			4.01401	0.03932			4.01401	0.02898			4.01401	0.26165
		4.01902	0.02455			4.01902	0.03936			4.01902	0.02902			4.01902	0.26197
		4.02402	0.02458			4.02402	0.03941			4.02402	0.02905			4.02402	0.2623
		4.02903	0.02461			4.02903	0.03946			4.02903	0.02909			4.02903	0.26262
		4.03403	0.02464			4.03403	0.03951			4.03403	0.02912			4.03403	0.26295
		4.03904	0.02467			4.03904	0.03955			4.03904	0.02916			4.03904	0.26327
		4.04404	0.0247			4.04404	0.0396			4.04404	0.02919			4.04404	0.2636
		4.04905	0.02473			4.04905	0.03965			4.04905	0.02923			4.04905	0.26392
		4.05405	0.02476			4.05405	0.0397			4.05405	0.02927			4.05405	0.26424
		4.05906	0.02479			4.05906	0.03974			4.05906	0.0293			4.05906	0.26457
		4.06406	0.02482			4.06406	0.03979			4.06406	0.02934			4.06406	0.26489
		4.06907	0.02485			4.06907	0.03984			4.06907	0.02937			4.06907	0.26522
		4.07407	0.02488			4.07407	0.03989			4.07407	0.02941			4.07407	0.26554
		4.07908	0.02491			4.07908	0.03993			4.07908	0.02944			4.07908	0.26587
		4.08408	0.02494			4.08408	0.03998			4.08408	0.02948			4.08408	0.26619
		4.08909	0.02497			4.08909	0.04003			4.08909	0.02951			4.08909	0.26651
		4.09409	0.025			4.09409	0.04008			4.09409	0.02955			4.09409	0.26684
		4.0991	0.02503			4.0991	0.04013			4.0991	0.02958			4.0991	0.26716
		4.1041	0.02506			4.1041	0.04017			4.1041	0.02962			4.1041	0.26749
		4.10911	0.02509			4.10911	0.04022			4.10911	0.02965			4.10911	0.26781
		4.11411	0.02512			4.11411	0.04027			4.11411	0.02969			4.11411	0.26814
		4.11912	0.02515			4.11912	0.04032			4.11912	0.02972			4.11912	0.26846
		4.12412	0.02518			4.12412	0.04036			4.12412	0.02976			4.12412	0.26878
		4.12913	0.02521			4.12913	0.04041			4.12913	0.02979			4.12913	0.26911
		4.13413	0.02524			4.13413	0.04046			4.13413	0.02983			4.13413	0.26943
		4.13914	0.02527			4.13914	0.04051			4.13914	0.02986			4.13914	0.26976
		4.14414	0.0253			4.14414	0.04055			4.14414	0.0299			4.14414	0.27008
		4.14915	0.02533			4.14915	0.0406			4.14915	0.02993			4.14915	0.27041
		4.15415	0.02536			4.15415	0.04065			4.15415	0.02997			4.15415	0.27073
		4.15916	0.02539			4.15916	0.0407			4.15916	0.03			4.15916	0.27106
		4.16416	0.02542			4.16416	0.04074			4.16416	0.03004			4.16416	0.27138
		4.16917	0.02545			4.16917	0.04079			4.16917	0.03007			4.16917	0.2717
		4.17417	0.02548			4.17417	0.04084			4.17417	0.03011			4.17417	0.27203
		4.17918	0.02551			4.17918	0.04089			4.17918	0.03014			4.17918	0.27235
		4.18418	0.02554			4.18418	0.04094			4.18418	0.03018			4.18418	0.27268
		4.18919	0.02557			4.18919	0.04098			4.18919	0.03021			4.18919	0.273
		4.19419	0.0256			4.19419	0.04103			4.19419	0.03025			4.19419	0.27333
		4.1992	0.02563			4.1992	0.04108			4.1992	0.03028			4.1992	0.27365
		4.2042	0.02566			4.2042	0.04113			4.2042	0.03032			4.2042	0.27397
		4.20921	0.0257			4.20921	0.04117			4.20921	0.03036			4.20921	0.2743
		4.21421	0.02573			4.21421	0.04122			4.21421	0.03039			4.21421	0.27462
		4.21922	0.02576			4.21922	0.04127			4.21922	0.03043			4.21922	0.27495
		4.22422	0.02579			4.22422	0.04132			4.22422	0.03046			4.22422	0.27527
		4.22923	0.02582			4.22923	0.04136			4.22923	0.0305			4.22923	0.2756
		4.23423	0.02585			4.23423	0.04141			4.23423	0.03053			4.23423	0.27592
		4.23924	0.02588			4.23924	0.04146			4.23924	0.03057			4.23924	0.27624
		4.24424	0.02591			4.24424	0.04151			4.24424	0.0306			4.24424	0.27657
		4.24925	0.02594			4.24925	0.04155			4.24925	0.03064			4.24925	0.27689
		4.25425	0.02597			4.25425	0.0416			4.25425	0.03067			4.25425	0.27722
		4.25926	0.026			4.25926	0.04165			4.25926	0.03071			4.25926	0.27754
		4.26426	0.02603			4.26426	0.0417			4.26426	0.03074			4.26426	0.27787
		4.26927	0.02606			4.26927	0.04174			4.26927	0.03078			4.26927	0.27819
		4.27427	0.02609			4.27427	0.04179			4.27427	0.03081			4.27427	0.27851
		4.27928	0.02612			4.27928	0.04184			4.27928	0.03085			4.27928	0.27884
		4.28428	0.02615			4.28428	0.04189			4.28428	0.03088			4.28428	0.27916
		4.28929	0.02618			4.28929	0.04194			4.28929	0.03092			4.28929	0.27949
		4.29429	0.02621			4.29429	0.04198			4.29429	0.03095			4.29429	0.27981
		4.2993	0.02624			4.2993	0.04203			4.2993	0.03099			4.2993	0.28014
		4.3043	0.02627			4.3043	0.04208			4.3043	0.03102			4.3043	0.28046
		4.30931	0.0263			4.30931	0.04213			4.30931	0.03106			4.30931	0.28078
		4.31431	0.02633			4.31431	0.04217			4.31431	0.03109			4.31431	0.28111
		4.31932	0.02636			4.31932	0.04222			4.31932	0.03113			4.31932	0.28143
		4.32432	0.02639			4.32432	0.04227			4.32432	0.03116			4.32432	0.28176
		4.32933	0.02642			4.32933	0.04232			4.32933	0.0312			4.32933	0.28208
		4.33433	0.02645			4.33433	0.04236			4.33433	0.03123			4.33433	0.28241
		4.33934	0.02648			4.33934	0.04241			4.33934	0.03127			4.33934	0.28273
		4.34434	0.02651			4.34434	0.04246			4.34434	0.0313			4.34434	0.28306
		4.34935	0.02654			4.34935	0.04251			4.34935	0.03134			4.34935	0.28338
		4.35435	0.02657			4.35435	0.04255			4.35435	0.03138			4.35435	0.2837
		4.35936	0.0266			4.35936	0.0426			4.35936	0.03141			4.35936	0.28403
		4.36436	0.02663			4.36436	0.04265			4.36436	0.03145			4.36436	0.28435
		4.36937	0.02666			4.36937	0.0427			4.36937	0.03148			4.36937	0.28468
		4.37437	0.02669			4.37437	0.04274			4.37437	0.03152			4.37437	0.285
		4.37938	0.02672			4.37938	0.04279			4.37938	0.03155			4.37938	0.28533
		4.38438	0.02675			4.38438	0.04284			4.38438	0.03159			4.38438	0.28565
		4.38939	0.02678			4.38939	0.04289			4.38939	0.03162			4.38939	0.28597
		4.39439	0.02681			4.39439	0.04294			4.39439	0.03166			4.39439	0.2863
		4.3994	0.02684			4.3994	0.04298			4.3994	0.03169			4.3994	0.28662
		4.4044	0.02687			4.4044	0.04303			4.4044	0.03173			4.4044	0.28695
		4.40941	0.0269			4.40941	0.04308			4.40941	0.03176			4.40941	0.28727
		4.41441	0.02693			4.41441	0.04313			4.41441	0.0318			4.41441	0.2876
		4.41942	0.02696			4.41942	0.04317			4.41942	0.03183			4.41942	0.28792
		4.42442	0.02699			4.42442	0.04322			4.42442	0.03187			4.42442	0.28824
		4.42943	0.02702			4.42943	0.04327			4.42943	0.0319			4.42943	0.28857
		4.43443	0.02705			4.43443	0.04332			4.43443	0.03194			4.43443	0.28889
		4.43944	0.02708			4.43944	0.04336			4.43944	0.03197			4.43944	0.28922
		4.44444	0.02711			4.44444	0.04341			4.44444	0.03201			4.44444	0.28954
		4.44945	0.02714			4.44945	0.04346			4.44945	0.03204			4.44945	0.28987
		4.45445	0.02717			4.45445	0.04351			4.45445	0.03208			4.45445	0.29019
		4.45946	0.0272			4.45946	0.04355			4.45946	0.03211			4.45946	0.29051
		4.46446	0.02723			4.46446	0.0436			4.46446	0.03215			4.46446	0.29084
		4.46947	0.02727			4.46947	0.04365			4.46947	0.03218			4.46947	0.29116
		4.47447	0.0273			4.47447	0.0437			4.47447	0.03222			4.47447	0.29149
		4.47948	0.02733			4.47948	0.04375			4.47948	0.03225			4.47948	0.29181
		4.48448	0.02736			4.48448	0.04379			4.48448	0.03229			4.48448	0.29214
		4.48949	0.02739			4.48949	0.04384			4.48949	0.03232			4.48949	0.29246
		4.49449	0.02742			4.49449	0.04389			4.49449	0.03236			4.49449	0.29278
		4.4995	0.02745			4.4995	0.04394			4.4995	0.0324			4.4995	0.29311
		4.5045	0.02748			4.5045	0.04398			4.5045	0.03243			4.5045	0.29343
		4.50951	0.02751			4.50951	0.04403			4.50951	0.03247			4.50951	0.29376
		4.51451	0.02754			4.51451	0.04408			4.51451	0.0325			4.51451	0.29408
		4.51952	0.02757			4.51952	0.04413			4.51952	0.03254			4.51952	0.29441
		4.52452	0.0276			4.52452	0.04417			4.52452	0.03257			4.52452	0.29473
		4.52953	0.02763			4.52953	0.04422			4.52953	0.03261			4.52953	0.29506
		4.53453	0.02766			4.53453	0.04427			4.53453	0.03264			4.53453	0.29538
		4.53954	0.02769			4.53954	0.04432			4.53954	0.03268			4.53954	0.2957
		4.54454	0.02772			4.54454	0.04436			4.54454	0.03271			4.54454	0.29603
		4.54955	0.02775			4.54955	0.04441			4.54955	0.03275			4.54955	0.29635
		4.55455	0.02778			4.55455	0.04446			4.55455	0.03278			4.55455	0.29668
		4.55956	0.02781			4.55956	0.04451			4.55956	0.03282			4.55956	0.297
		4.56456	0.02784			4.56456	0.04455			4.56456	0.03285			4.56456	0.29733
		4.56957	0.02787			4.56957	0.0446			4.56957	0.03289			4.56957	0.29765
		4.57457	0.0279			4.57457	0.04465			4.57457	0.03292			4.57457	0.29797
		4.57958	0.02793			4.57958	0.0447			4.57958	0.03296			4.57958	0.2983
		4.58458	0.02796			4.58458	0.04475			4.58458	0.03299			4.58458	0.29862
		4.58959	0.02799			4.58959	0.04479			4.58959	0.03303			4.58959	0.29895
		4.59459	0.02802			4.59459	0.04484			4.59459	0.03306			4.59459	0.29927
		4.5996	0.02805			4.5996	0.04489			4.5996	0.0331			4.5996	0.2996
		4.6046	0.02808			4.6046	0.04494			4.6046	0.03313			4.6046	0.29992
		4.60961	0.02811			4.60961	0.04498			4.60961	0.03317			4.60961	0.30024
		4.61461	0.02814			4.61461	0.04503			4.61461	0.0332			4.61461	0.30057
		4.61962	0.02817			4.61962	0.04508			4.61962	0.03324			4.61962	0.30089
		4.62462	0.0282			4.62462	0.04513			4.62462	0.03327			4.62462	0.30122
		4.62963	0.02823			4.62963	0.04517			4.62963	0.03331			4.62963	0.30154
		4.63463	0.02826			4.63463	0.04522			4.63463	0.03334			4.63463	0.30187
		4.63964	0.02829			4.63964	0.04527			4.63964	0.03338			4.63964	0.30219
		4.64464	0.02832			4.64464	0.04532			4.64464	0.03342			4.64464	0.30251
		4.64965	0.02835			4.64965	0.04536			4.64965	0.03345			4.64965	0.30284
		4.65465	0.02838			4.65465	0.04541			4.65465	0.03349			4.65465	0.30316
		4.65966	0.02841			4.65966	0.04546			4.65966	0.03352			4.65966	0.30349
		4.66466	0.02844			4.66466	0.04551			4.66466	0.03356			4.66466	0.30381
		4.66967	0.02847			4.66967	0.04555			4.66967	0.03359			4.66967	0.30414
		4.67467	0.0285			4.67467	0.0456			4.67467	0.03363			4.67467	0.30446
		4.67968	0.02853			4.67968	0.04565			4.67968	0.03366			4.67968	0.30479
		4.68468	0.02856			4.68468	0.0457			4.68468	0.0337			4.68468	0.30511
		4.68969	0.02859			4.68969	0.04575			4.68969	0.03373			4.68969	0.30543
		4.69469	0.02862			4.69469	0.04579			4.69469	0.03377			4.69469	0.30576
		4.6997	0.02865			4.6997	0.04584			4.6997	0.0338			4.6997	0.30608
		4.7047	0.02868			4.7047	0.04589			4.7047	0.03384			4.7047	0.30641
		4.70971	0.02871			4.70971	0.04594			4.70971	0.03387			4.70971	0.30673
		4.71471	0.02874			4.71471	0.04598			4.71471	0.03391			4.71471	0.30706
		4.71972	0.02877			4.71972	0.04603			4.71972	0.03394			4.71972	0.30738
		4.72472	0.0288			4.72472	0.04608			4.72472	0.03398			4.72472	0.3077
		4.72973	0.02884			4.72973	0.04613			4.72973	0.03401			4.72973	0.30803
		4.73473	0.02887			4.73473	0.04617			4.73473	0.03405			4.73473	0.30835
		4.73974	0.0289			4.73974	0.04622			4.73974	0.03408			4.73974	0.30868
		4.74474	0.02893			4.74474	0.04627			4.74474	0.03412			4.74474	0.309
		4.74975	0.02896			4.74975	0.04632			4.74975	0.03415			4.74975	0.30933
		4.75475	0.02899			4.75475	0.04636			4.75475	0.03419			4.75475	0.30965
		4.75976	0.02902			4.75976	0.04641			4.75976	0.03422			4.75976	0.30997
		4.76476	0.02905			4.76476	0.04646			4.76476	0.03426			4.76476	0.3103
		4.76977	0.02908			4.76977	0.04651			4.76977	0.03429			4.76977	0.31062
		4.77477	0.02911			4.77477	0.04656			4.77477	0.03433			4.77477	0.31095
		4.77978	0.02914			4.77978	0.0466			4.77978	0.03436			4.77978	0.31127
		4.78478	0.02917			4.78478	0.04665			4.78478	0.0344			4.78478	0.3116
		4.78979	0.0292			4.78979	0.0467			4.78979	0.03443			4.78979	0.31192
		4.79479	0.02923			4.79479	0.04675			4.79479	0.03447			4.79479	0.31224
		4.7998	0.02926			4.7998	0.04679			4.7998	0.03451			4.7998	0.31257
		4.8048	0.02929			4.8048	0.04684			4.8048	0.03454			4.8048	0.31289
		4.80981	0.02932			4.80981	0.04689			4.80981	0.03458			4.80981	0.31322
		4.81481	0.02935			4.81481	0.04694			4.81481	0.03461			4.81481	0.31354
		4.81982	0.02938			4.81982	0.04698			4.81982	0.03465			4.81982	0.31387
		4.82482	0.02941			4.82482	0.04703			4.82482	0.03468			4.82482	0.31419
		4.82983	0.02944			4.82983	0.04708			4.82983	0.03472			4.82983	0.31451
		4.83483	0.02947			4.83483	0.04713			4.83483	0.03475			4.83483	0.31484
		4.83984	0.0295			4.83984	0.04717			4.83984	0.03479			4.83984	0.31516
		4.84484	0.02953			4.84484	0.04722			4.84484	0.03482			4.84484	0.31549
		4.84985	0.02956			4.84985	0.04727			4.84985	0.03486			4.84985	0.31581
		4.85485	0.02959			4.85485	0.04732			4.85485	0.03489			4.85485	0.31614
		4.85986	0.02962			4.85986	0.04736			4.85986	0.03493			4.85986	0.31646
		4.86486	0.02965			4.86486	0.04741			4.86486	0.03496			4.86486	0.31679
		4.86987	0.02968			4.86987	0.04746			4.86987	0.035			4.86987	0.31711
		4.87487	0.02971			4.87487	0.04751			4.87487	0.03503			4.87487	0.31743
		4.87988	0.02974			4.87988	0.04756			4.87988	0.03507			4.87988	0.31776
		4.88488	0.02977			4.88488	0.0476			4.88488	0.0351			4.88488	0.31808
		4.88989	0.0298			4.88989	0.04765			4.88989	0.03514			4.88989	0.31841
		4.89489	0.02983			4.89489	0.0477			4.89489	0.03517			4.89489	0.31873
		4.8999	0.02986			4.8999	0.04775			4.8999	0.03521			4.8999	0.31906
		4.9049	0.02989			4.9049	0.04779			4.9049	0.03524			4.9049	0.31938
		4.90991	0.02992			4.90991	0.04784			4.90991	0.03528			4.90991	0.3197
		4.91491	0.02995			4.91491	0.04789			4.91491	0.03531			4.91491	0.32003
		4.91992	0.02998			4.91992	0.04794			4.91992	0.03535			4.91992	0.32035
		4.92492	0.03001			4.92492	0.04798			4.92492	0.03538			4.92492	0.32068
		4.92993	0.03004			4.92993	0.04803			4.92993	0.03542			4.92993	0.321
		4.93493	0.03007			4.93493	0.04808			4.93493	0.03545			4.93493	0.32133
		4.93994	0.0301			4.93994	0.04813			4.93994	0.03549			4.93994	0.32165
		4.94494	0.03013			4.94494	0.04817			4.94494	0.03553			4.94494	0.32197
		4.94995	0.03016			4.94995	0.04822			4.94995	0.03556			4.94995	0.3223
		4.95495	0.03019			4.95495	0.04827			4.95495	0.0356			4.95495	0.32262
		4.95996	0.03022			4.95996	0.04832			4.95996	0.03563			4.95996	0.32295
		4.96496	0.03025			4.96496	0.04837			4.96496	0.03567			4.96496	0.32327
		4.96997	0.03028			4.96997	0.04841			4.96997	0.0357			4.96997	0.3236
		4.97497	0.03031			4.97497	0.04846			4.97497	0.03574			4.97497	0.32392
		4.97998	0.03034			4.97998	0.04851			4.97998	0.03577			4.97998	0.32424
		4.98498	0.03037			4.98498	0.04856			4.98498	0.03581			4.98498	0.32457
		4.98999	0.03041			4.98999	0.0486			4.98999	0.03584			4.98999	0.32489
		4.99499	0.03044			4.99499	0.04865			4.99499	0.03588			4.99499	0.32522
		5	0.03047			5	0.0487			5	0.03591			5	0.32554

## Sheet: Fig5f
1	0.22948	1	0.22998	1	0.23037
2	0.16235	2	0.16206	2	0.16254
3	0.13242	3	0.13233	3	0.13271
4	0.11485	4	0.11453	4	0.11521
5	0.10294	5	0.10279	5	0.10245
6	0.09357	6	0.09387	6	0.09369
7	0.08662	7	0.08678	7	0.08664
8	0.08116	8	0.08138	8	0.08131
9	0.0763	9	0.07688	9	0.07679
10	0.0729	10	0.07279	10	0.07282
11	0.06935	11	0.06977	11	0.0692
12	0.0662	12	0.0665	12	0.06621
13	0.06394	13	0.06412	13	0.06377
14	0.0613	14	0.06162	14	0.06169
15	0.05928	15	0.0593	15	0.05919
16	0.05741	16	0.05742	16	0.0579
17	0.05605	17	0.05642	17	0.05611
18	0.05431	18	0.05439	18	0.05439
19	0.05289	19	0.05288	19	0.05275
20	0.05167	20	0.05164	20	0.05165
21	0.04997	21	0.05049	21	0.05006
22	0.04921	22	0.04976	22	0.04899
23	0.04821	23	0.04833	23	0.04774
24	0.04719	24	0.04735	24	0.04699
25	0.04615	25	0.04622	25	0.04581
26	0.04503	26	0.045	26	0.0452
27	0.04479	27	0.04459	27	0.04399
28	0.04359	28	0.04327	28	0.04361
29	0.04291	29	0.04294	29	0.04274
30	0.04219	30	0.04204	30	0.04223
31	0.04148	31	0.0413	31	0.04105
32	0.04051	32	0.04071	32	0.04089
33	0.04006	33	0.04012	33	0.03996
34	0.03957	34	0.03991	34	0.03946
35	0.03911	35	0.03909	35	0.03887
36	0.03818	36	0.03867	36	0.03824
37	0.03783	37	0.03808	37	0.03803
38	0.0372	38	0.03726	38	0.03708
39	0.03691	39	0.03681	39	0.03696
40	0.03617	40	0.03654	40	0.03641
41	0.03551	41	0.03552	41	0.03559
42	0.03516	42	0.03558	42	0.03575
43	0.0351	43	0.03536	43	0.03531
44	0.03457	44	0.0349	44	0.03466
45	0.03407	45	0.03413	45	0.03464
46	0.03404	46	0.03382	46	0.03399
47	0.03345	47	0.03365	47	0.0333
48	0.03345	48	0.033	48	0.03321
49	0.03278	49	0.0326	49	0.03268
50	0.0324	50	0.03274	50	0.03265
51	0.03252	51	0.03216	51	0.03189
52	0.03173	52	0.03156	52	0.03191
53	0.03157	53	0.03154	53	0.03143
54	0.03139	54	0.03137	54	0.03148
55	0.03103	55	0.03092	55	0.0309
56	0.03047	56	0.03051	56	0.03069
57	0.03039	57	0.0305	57	0.03043
58	0.03007	58	0.03017	58	0.03003
59	0.02999	59	0.02961	59	0.02982
60	0.02947	60	0.02956	60	0.02948
61	0.02922	61	0.02912	61	0.02921
62	0.02886	62	0.02898	62	0.02877
63	0.02859	63	0.02872	63	0.02917
64	0.02903	64	0.02891	64	0.02879
65	0.02834	65	0.02837	65	0.02837
66	0.02825	66	0.02816	66	0.0283
67	0.02769	67	0.02818	67	0.02778
68	0.02782	68	0.02807	68	0.02816
69	0.0274	69	0.02742	69	0.02755
70	0.02748	70	0.02753	70	0.02689
71	0.02728	71	0.02735	71	0.02715
72	0.02685	72	0.02742	72	0.02722
73	0.02646	73	0.02698	73	0.02718
74	0.02649	74	0.0267	74	0.02678
75	0.02616	75	0.02663	75	0.02659
76	0.02583	76	0.02629	76	0.02636
77	0.02587	77	0.02634	77	0.02575
78	0.02594	78	0.02575	78	0.02621
79	0.02588	79	0.02573	79	0.02571
80	0.02555	80	0.02551	80	0.02563
81	0.0253	81	0.02546	81	0.02563
82	0.02508	82	0.02486	82	0.02508
83	0.02517	83	0.02544	83	0.02528
84	0.0248	84	0.0247	84	0.0254
85	0.02465	85	0.02474	85	0.02466
86	0.02466	86	0.02468	86	0.02508
87	0.02478	87	0.02449	87	0.02474
88	0.02419	88	0.02445	88	0.02425
89	0.02406	89	0.02408	89	0.02445
90	0.02415	90	0.02387	90	0.02454
91	0.02386	91	0.02423	91	0.02377
92	0.02393	92	0.02447	92	0.02417
93	0.02336	93	0.02387	93	0.02364
94	0.0236	94	0.02371	94	0.02356
95	0.02325	95	0.0236	95	0.02358
96	0.02359	96	0.0236	96	0.02347
97	0.02309	97	0.02311	97	0.02287
98	0.02315	98	0.02311	98	0.02324
99	0.02295	99	0.02332	99	0.02332
100	0.023	100	0.02296	100	0.02335
101	0.02239	101	0.0228	101	0.02258
102	0.02273	102	0.02272	102	0.02267
103	0.02251	103	0.02283	103	0.02249
104	0.02236	104	0.02245	104	0.02256
105	0.02225	105	0.02247	105	0.02258
106	0.0218	106	0.02232	106	0.02238
107	0.02198	107	0.02249	107	0.02207
108	0.02202	108	0.0222	108	0.02175
109	0.02181	109	0.02218	109	0.02209
110	0.02203	110	0.02168	110	0.02182
111	0.02129	111	0.0217	111	0.02205
112	0.02168	112	0.02166	112	0.02205
113	0.02138	113	0.02191	113	0.02184
114	0.02155	114	0.0214	114	0.02135
115	0.02116	115	0.02133	115	0.02198
116	0.02132	116	0.02133	116	0.0217
117	0.02115	117	0.02121	117	0.02131
118	0.02094	118	0.02147	118	0.02098
119	0.02094	119	0.02114	119	0.02119
120	0.02091	120	0.02083	120	0.02121
121	0.0209	121	0.02112	121	0.02069
122	0.02086	122	0.02095	122	0.02081
123	0.02056	123	0.02083	123	0.02062
124	0.02076	124	0.02078	124	0.02093
125	0.02059	125	0.02074	125	0.02081
126	0.02016	126	0.02064	126	0.02052
127	0.02056	127	0.02059	127	0.02078
128	0.02024	128	0.02052	128	0.0204
129	0.02026	129	0.02054	129	0.02057
130	0.02022	130	0.02035	130	0.02032
131	0.02015	131	0.01992	131	0.02015
132	0.01992	132	0.01972	132	0.0201
133	0.01985	133	0.0199	133	0.0202
134	0.01961	134	0.0197	134	0.01967
135	0.02012	135	0.01962	135	0.01957
136	0.01976	136	0.01954	136	0.01982
137	0.01936	137	0.01992	137	0.01972
138	0.01939	138	0.01944	138	0.01975
139	0.01928	139	0.01908	139	0.01962
140	0.0196	140	0.01905	140	0.01944
141	0.01966	141	0.01952	141	0.01934
142	0.01938	142	0.01939	142	0.01926
143	0.01917	143	0.01921	143	0.01926
144	0.01914	144	0.0186	144	0.01934
145	0.01904	145	0.01918	145	0.01903
146	0.01907	146	0.01918	146	0.01908
147	0.01896	147	0.01903	147	0.0191
148	0.01923	148	0.01825	148	0.01895
149	0.01867	149	0.0191	149	0.01903
150	0.01892	150	0.01876	150	0.01876
151	0.01864	151	0.01865	151	0.01931
152	0.01855	152	0.01879	152	0.01887
153	0.01866	153	0.01871	153	0.01828
154	0.01843	154	0.01844	154	0.01873
155	0.01837	155	0.01852	155	0.0186
156	0.01846	156	0.01873	156	0.01884
157	0.01808	157	0.01849	157	0.01895
158	0.01845	158	0.01844	158	0.01833
159	0.01821	159	0.01838	159	0.01838
160	0.01825	160	0.01841	160	0.01797
161	0.01836	161	0.01836	161	0.01825
162	0.01794	162	0.01792	162	0.01811
163	0.01786	163	0.0178	163	0.01803
164	0.01814	164	0.01797	164	0.01814
165	0.01793	165	0.01789	165	0.01819
166	0.0179	166	0.01769	166	0.01792
167	0.01809	167	0.01755	167	0.01808
168	0.01764	168	0.01755	168	0.01783
169	0.0179	169	0.01772	169	0.01789
170	0.01769	170	0.01744	170	0.01786
171	0.01759	171	0.01792	171	0.018
172	0.01778	172	0.01746	172	0.01775
173	0.01756	173	0.01766	173	0.0178
174	0.01731	174	0.01755	174	0.01741
175	0.01716	175	0.01715	175	0.01746
176	0.01727	176	0.01741	176	0.01766
177	0.01746	177	0.01729	177	0.01746
178	0.01742	178	0.01735	178	0.01764
179	0.01727	179	0.01735	179	0.01746
180	0.01697	180	0.0172	180	0.01744
181	0.01719	181	0.017	181	0.01752
182	0.01745	182	0.01685	182	0.01729
183	0.01684	183	0.01697	183	0.01709
184	0.01707	184	0.01715	184	0.01697
185	0.01725	185	0.01685	185	0.01735
186	0.01693	186	0.01723	186	0.01679
187	0.01684	187	0.0167	187	0.01715
188	0.01709	188	0.01676	188	0.01715
189	0.01679	189	0.01652	189	0.01655
190	0.01654	190	0.0167	190	0.01673
191	0.01698	191	0.01658	191	0.01658
192	0.01669	192	0.01649	192	0.01625
193	0.01669	193	0.01631	193	0.01667
194	0.01676	194	0.01676	194	0.01619
195	0.0165	195	0.0164	195	0.01664
196	0.01677	196	0.01603	196	0.01664
197	0.01644	197	0.01625	197	0.01673
198	0.0165	198	0.01649	198	0.01628
199	0.0166	199	0.01643	199	0.01631
200	0.01648	200	0.01655	200	0.01667
201	0.01626	201	0.01606	201	0.01619
202	0.01647	202	0.01597	202	0.01634
203	0.01608	203	0.01619	203	0.01649
204	0.01627	204	0.01581	204	0.01628
205	0.01632	205	0.01606	205	0.01646
206	0.01601	206	0.01658	206	0.01603
207	0.01611	207	0.01584	207	0.01628
208	0.01613	208	0.01581	208	0.01667
209	0.01586	209	0.01568	209	0.01634
210	0.01605	210	0.01575	210	0.01565
211	0.0159	211	0.01578	211	0.01587
212	0.01627	212	0.01552	212	0.01575
213	0.01591	213	0.01587	213	0.01568
214	0.01564	214	0.01603	214	0.01603
215	0.01577	215	0.016	215	0.01552
216	0.01575	216	0.01581	216	0.01562
217	0.01605	217	0.01565	217	0.01578
218	0.01569	218	0.01597	218	0.01572
219	0.01601	219	0.01568	219	0.01587
220	0.01574	220	0.01559	220	0.01568
221	0.01568	221	0.01556	221	0.01523
222	0.01542	222	0.01562	222	0.01591
223	0.01534	223	0.01526	223	0.01587
224	0.01544	224	0.01533	224	0.01533
225	0.01548	225	0.01536	225	0.01536
226	0.01522	226	0.01546	226	0.01526
227	0.01469	227	0.0151	227	0.01556
228	0.01525	228	0.01523	228	0.01552
229	0.0151	229	0.01533	229	0.01552
230	0.01533	230	0.0153	230	0.0153
231	0.01516	231	0.01526	231	0.0153
232	0.01544	232	0.01513	232	0.01539
233	0.01512	233	0.01523	233	0.01503
234	0.0151	234	0.0151	234	0.0153
235	0.01495	235	0.0152	235	0.01562
236	0.01537	236	0.0148	236	0.01543
237	0.0154	237	0.0148	237	0.015
238	0.01527	238	0.01466	238	0.01503
239	0.01478	239	0.01473	239	0.01552
240	0.01472	240	0.01473	240	0.01473
241	0.01479	241	0.01473	241	0.01539
242	0.01473	242	0.0152	242	0.01476
243	0.0149	243	0.0147	243	0.01513
244	0.01468	244	0.0148	244	0.0149
245	0.01496	245	0.0149	245	0.0148
246	0.01446	246	0.01456	246	0.01507
247	0.01476	247	0.0149	247	0.01463
248	0.01476	248	0.01459	248	0.015
249	0.01478	249	0.0149	249	0.01536
250	0.01468	250	0.01453	250	0.0149
251	0.01478	251	0.01453	251	0.0147
252	0.01468	252	0.01456	252	0.01476
253	0.01455	253	0.01473	253	0.01517
254	0.01432	254	0.01463	254	0.01497
255	0.01477	255	0.01442	255	0.01466
256	0.0143	256	0.01425	256	0.0152
257	0.01419	257	0.01439	257	0.0148
258	0.01433	258	0.01371	258	0.01446
259	0.01439	259	0.01446	259	0.01442
260	0.01429	260	0.01439	260	0.01428
261	0.01443	261	0.01414	261	0.01453
262	0.01429	262	0.01389	262	0.01425
263	0.01415	263	0.01382	263	0.01432
264	0.01404	264	0.01418	264	0.01418
265	0.01434	265	0.014	265	0.01414
266	0.01422	266	0.01411	266	0.01442
267	0.01432	267	0.01407	267	0.01428
268	0.01402	268	0.01389	268	0.01453
269	0.0146	269	0.01396	269	0.01425
270	0.01385	270	0.01371	270	0.01421
271	0.01419	271	0.01375	271	0.01456
272	0.01411	272	0.01407	272	0.01404
273	0.01424	273	0.01386	273	0.01442
274	0.01377	274	0.01421	274	0.01425
275	0.01427	275	0.01439	275	0.01428
276	0.0136	276	0.01439	276	0.01386
277	0.01369	277	0.01378	277	0.0136
278	0.01402	278	0.01353	278	0.01435
279	0.01362	279	0.01382	279	0.01389
280	0.01396	280	0.0136	280	0.01389
281	0.0136	281	0.01382	281	0.01418
282	0.01369	282	0.01375	282	0.01404
283	0.01386	283	0.01389	283	0.01439
284	0.01364	284	0.01396	284	0.01382
285	0.01381	285	0.01371	285	0.01414
286	0.01366	286	0.01393	286	0.01342
287	0.01376	287	0.01342	287	0.01411
288	0.0138	288	0.01349	288	0.01411
289	0.01357	289	0.01364	289	0.01315
290	0.01351	290	0.01311	290	0.01345
291	0.01353	291	0.01345	291	0.01371
292	0.01374	292	0.01367	292	0.01428
293	0.0135	293	0.01411	293	0.01404
294	0.01338	294	0.01334	294	0.01327
295	0.01322	295	0.01323	295	0.01353
296	0.01376	296	0.01304	296	0.01338
297	0.01309	297	0.01378	297	0.01367
298	0.01334	298	0.013	298	0.01356
299	0.0135	299	0.013	299	0.01375
300	0.01363	300	0.0136	300	0.013
301	0.01364	301	0.01296	301	0.01349
302	0.01325	302	0.013	302	0.01371
303	0.01293	303	0.01311	303	0.01327
304	0.01312	304	0.01315	304	0.01353
305	0.01329	305	0.01319	305	0.01334
306	0.01333	306	0.013	306	0.01345
307	0.01315	307	0.0133	307	0.01338
308	0.01284	308	0.01345	308	0.0136
309	0.01313	309	0.01378	309	0.01345
310	0.01307	310	0.01323	310	0.01308
311	0.01323	311	0.01334	311	0.01315
312	0.01288	312	0.01288	312	0.01378
313	0.0129	313	0.01269	313	0.0133
314	0.01323	314	0.01292	314	0.01356
315	0.0132	315	0.01311	315	0.01319
316	0.01307	316	0.01308	316	0.01349
317	0.0132	317	0.013	317	0.01319
318	0.01302	318	0.01338	318	0.0133
319	0.01327	319	0.01269	319	0.01304
320	0.01277	320	0.01285	320	0.01323
321	0.01304	321	0.01288	321	0.01334
322	0.01293	322	0.01285	322	0.01311
323	0.01271	323	0.01292	323	0.01308
324	0.01277	324	0.01269	324	0.01288
325	0.01247	325	0.01292	325	0.01304
326	0.01277	326	0.01304	326	0.01315
327	0.01279	327	0.01277	327	0.01292
328	0.01285	328	0.01288	328	0.01288
329	0.01263	329	0.01285	329	0.01288
330	0.01273	330	0.01257	330	0.01288
331	0.01259	331	0.01269	331	0.01296
332	0.01251	332	0.01265	332	0.01288
333	0.01292	333	0.01221	333	0.01261
334	0.01262	334	0.01249	334	0.01285
335	0.01243	335	0.01261	335	0.01241
336	0.0126	336	0.01265	336	0.013
337	0.01263	337	0.01253	337	0.01315
338	0.01279	338	0.01241	338	0.01304
339	0.01248	339	0.01261	339	0.01269
340	0.01252	340	0.01253	340	0.01257
341	0.01266	341	0.01217	341	0.01292
342	0.01259	342	0.01241	342	0.01304
343	0.01264	343	0.01212	343	0.01288
344	0.01243	344	0.01241	344	0.013
345	0.0124	345	0.01245	345	0.01261
346	0.0127	346	0.01245	346	0.01249
347	0.01276	347	0.01241	347	0.01269
348	0.01251	348	0.01253	348	0.01285
349	0.01245	349	0.01217	349	0.01269
350	0.01217	350	0.01204	350	0.01261
351	0.01218	351	0.01225	351	0.01269
352	0.01226	352	0.0117	352	0.01265
353	0.01221	353	0.01233	353	0.01253
354	0.01258	354	0.01212	354	0.01249
355	0.0128	355	0.01221	355	0.01245
356	0.0125	356	0.01204	356	0.01265
357	0.01261	357	0.01212	357	0.01204
358	0.01228	358	0.01204	358	0.01269
359	0.0124	359	0.01212	359	0.01208
360	0.01202	360	0.01217	360	0.01253
361	0.01246	361	0.01183	361	0.01225
362	0.01238	362	0.01241	362	0.01257
363	0.01205	363	0.01245	363	0.01217
364	0.01247	364	0.01158	364	0.01217
365	0.01222	365	0.01183	365	0.01237
366	0.01213	366	0.01204	366	0.01229
367	0.01219	367	0.01187	367	0.01217
368	0.0119	368	0.01192	368	0.01225
369	0.01207	369	0.01192	369	0.01229
370	0.01225	370	0.01183	370	0.01237
371	0.01219	371	0.01187	371	0.01212
372	0.01214	372	0.012	372	0.01187
373	0.0119	373	0.01212	373	0.012
374	0.01212	374	0.01179	374	0.01204
375	0.01189	375	0.01158	375	0.0117
376	0.01202	376	0.01175	376	0.01229
377	0.01214	377	0.01179	377	0.01229
378	0.01218	378	0.0117	378	0.01217
379	0.01186	379	0.012	379	0.01225
380	0.01184	380	0.01175	380	0.01241
381	0.01187	381	0.01183	381	0.01277
382	0.01192	382	0.01166	382	0.01179
383	0.01152	383	0.01162	383	0.01183
384	0.01186	384	0.012	384	0.01149
385	0.01214	385	0.01208	385	0.01229
386	0.01199	386	0.0117	386	0.012
387	0.01203	387	0.01158	387	0.01175
388	0.01178	388	0.012	388	0.01187
389	0.01191	389	0.01153	389	0.01217
390	0.01185	390	0.01162	390	0.012
391	0.01166	391	0.01136	391	0.0117
392	0.01191	392	0.01136	392	0.01127
393	0.01189	393	0.01109	393	0.01175
394	0.01157	394	0.01095	394	0.01175
395	0.01182	395	0.01153	395	0.01212
396	0.01164	396	0.01122	396	0.01179
397	0.01134	397	0.01153	397	0.01158
398	0.01203	398	0.0114	398	0.01187
399	0.01151	399	0.0114	399	0.01175
400	0.01155	400	0.01149	400	0.01145
401	0.01152	401	0.01122	401	0.01162
402	0.01157	402	0.01127	402	0.01158
403	0.01135	403	0.01131	403	0.0117
404	0.01156	404	0.01149	404	0.01187
405	0.01147	405	0.01127	405	0.01122
406	0.01142	406	0.01127	406	0.01175
407	0.01178	407	0.0114	407	0.01153
408	0.01127	408	0.01149	408	0.01162
409	0.01161	409	0.01145	409	0.01166
410	0.01158	410	0.01109	410	0.01131
411	0.0114	411	0.01153	411	0.01149
412	0.01133	412	0.01122	412	0.01175
413	0.01113	413	0.01082	413	0.01175
414	0.01126	414	0.01109	414	0.01192
415	0.01151	415	0.01131	415	0.01145
416	0.01153	416	0.01105	416	0.01187
417	0.01144	417	0.011	417	0.0117
418	0.01143	418	0.01118	418	0.01136
419	0.01128	419	0.01136	419	0.0117
420	0.01159	420	0.01095	420	0.01153
421	0.01146	421	0.01095	421	0.01136
422	0.01134	422	0.011	422	0.01145
423	0.0113	423	0.01077	423	0.01145
424	0.01113	424	0.01086	424	0.01118
425	0.01133	425	0.01082	425	0.01136
426	0.01125	426	0.01086	426	0.0117
427	0.01133	427	0.01077	427	0.01149
428	0.01129	428	0.01122	428	0.01162
429	0.01131	429	0.01127	429	0.01127
430	0.01126	430	0.011	430	0.01153
431	0.01132	431	0.01095	431	0.01166
432	0.01126	432	0.01068	432	0.01149
433	0.0112	433	0.01131	433	0.01158
434	0.0114	434	0.0102	434	0.01118
435	0.01138	435	0.01095	435	0.01114
436	0.01084	436	0.01072	436	0.01127
437	0.0107	437	0.01091	437	0.01131
438	0.01104	438	0.01086	438	0.01127
439	0.01113	439	0.0103	439	0.01131
440	0.01128	440	0.01077	440	0.01153
441	0.01094	441	0.011	441	0.01077
442	0.01097	442	0.01049	442	0.01114
443	0.01098	443	0.01039	443	0.01127
444	0.01129	444	0.01077	444	0.0114
445	0.01085	445	0.01049	445	0.01058
446	0.0109	446	0.01063	446	0.011
447	0.01069	447	0.01044	447	0.01072
448	0.01136	448	0.01082	448	0.011
449	0.01069	449	0.01068	449	0.01086
450	0.01083	450	0.01068	450	0.01091
451	0.0111	451	0.01077	451	0.01086
452	0.01097	452	0.01054	452	0.01086
453	0.01083	453	0.01058	453	0.01063
454	0.01073	454	0.01025	454	0.011
455	0.01074	455	0.01091	455	0.011
456	0.01086	456	0.01044	456	0.01063
457	0.01081	457	0.01077	457	0.011
458	0.01116	458	0.01072	458	0.01058
459	0.01092	459	0.01025	459	0.01068
460	0.01137	460	0.01044	460	0.01114
461	0.01074	461	0.01054	461	0.01086
462	0.01053	462	0.01058	462	0.01086
463	0.01074	463	0.0101	463	0.01109
464	0.01127	464	0.01063	464	0.01114
465	0.01082	465	0.01049	465	0.01095
466	0.01087	466	0.01058	466	0.01058
467	0.01091	467	0.01082	467	0.01095
468	0.01083	468	0.01025	468	0.01072
469	0.01084	469	0.01025	469	0.01058
470	0.01096	470	0.01039	470	0.011
471	0.01064	471	0.01054	471	0.01086
472	0.01066	472	0.01025	472	0.01095
473	0.01072	473	0.0101	473	0.01091
474	0.01082	474	0.01005	474	0.01077
475	0.01076	475	0.01005	475	0.01086
476	0.01068	476	0.01058	476	0.01039
477	0.01083	477	0.01049	477	0.01105
478	0.01059	478	0.0101	478	0.01095
479	0.01081	479	0.01015	479	0.01063
480	0.01067	480	0.0098	480	0.01063
481	0.01074	481	0.01025	481	0.01039
482	0.01037	482	0.01015	482	0.01034
483	0.01102	483	0.01039	483	0.01054
484	0.01026	484	0.01049	484	0.01068
485	0.01085	485	0.01044	485	0.01034
486	0.01069	486	0.00995	486	0.01063
487	0.01076	487	0.01	487	0.01077
488	0.01042	488	0.01044	488	0.01054
489	0.01056	489	0.01025	489	0.01072
490	0.01065	490	0.01025	490	0.01054
491	0.01049	491	0.0099	491	0.01049
492	0.01058	492	0.01044	492	0.01039
493	0.01058	493	0.01039	493	0.01072
494	0.01044	494	0.00995	494	0.01086
495	0.01032	495	0.01015	495	0.01095
496	0.01027	496	0.01005	496	0.01034
497	0.01078	497	0.01015	497	0.01039
498	0.01041	498	0.01039	498	0.01068
499	0.01057	499	0.00975	499	0.01068
500	0.01055	500	0.0101	500	0.01063
501	0.01075	501	0.01	501	0.01068
502	0.01065	502	0.01015	502	0.01058
503	0.01064	503	0.01005	503	0.01049
504	0.01069	504	0.01005	504	0.01054
505	0.01037	505	0.01	505	0.01034
506	0.01025	506	0.0102	506	0.01044
507	0.01064	507	0.00995	507	0.0102
508	0.01043	508	0.00975	508	0.01005
509	0.01047	509	0.01039	509	0.01054
510	0.01056	510	0.0098	510	0.01077
511	0.01019	511	0.0097	511	0.01054
512	0.01032	512	0.0097	512	0.0103
513	0.01059	513	0.00995	513	0.01049
514	0.01017	514	0.0098	514	0.01015
515	0.01014	515	0.0099	515	0.0102
516	0.0102	516	0.0097	516	0.01025
517	0.00991	517	0.00943	517	0.01049
518	0.01032	518	0.00985	518	0.0103
519	0.00993	519	0.00985	519	0.0102
520	0.00989	520	0.0098	520	0.0101
521	0.01006	521	0.0101	521	0.01068
522	0.01013	522	0.00964	522	0.01063
523	0.01032	523	0.0099	523	0.01
524	0.01026	524	0.00922	524	0.01034
525	0.01034	525	0.00959	525	0.01005
526	0.00979	526	0.00949	526	0.00985
527	0.01037	527	0.00985	527	0.01015
528	0.00999	528	0.00906	528	0.01044
529	0.01015	529	0.0099	529	0.0103
530	0.01027	530	0.00949	530	0.0102
531	0.00999	531	0.00943	531	0.0098
532	0.01025	532	0.00943	532	0.00995
533	0.01012	533	0.01005	533	0.01015
534	0.01015	534	0.00949	534	0.0103
535	0.01029	535	0.00959	535	0.01
536	0.01007	536	0.00964	536	0.01005
537	0.01005	537	0.0097	537	0.01039
538	0.01044	538	0.00938	538	0.0099
539	0.01002	539	0.00995	539	0.01034
540	0.00987	540	0.00954	540	0.0098
541	0.0099	541	0.00949	541	0.01034
542	0.00993	542	0.00964	542	0.0102
543	0.01026	543	0.00906	543	0.0099
544	0.00975	544	0.00964	544	0.01005
545	0.00993	545	0.00943	545	0.0101
546	0.01001	546	0.00949	546	0.01049
547	0.00999	547	0.00954	547	0.0101
548	0.00979	548	0.00959	548	0.00995
549	0.01006	549	0.0097	549	0.0099
550	0.01022	550	0.00975	550	0.01
551	0.0101	551	0.00949	551	0.01
552	0.01006	552	0.00985	552	0.0103
553	0.00965	553	0.00954	553	0.00985
554	0.01003	554	0.00933	554	0.0101
555	0.0099	555	0.00985	555	0.01005
556	0.00989	556	0.00917	556	0.0102
557	0.00979	557	0.00943	557	0.01
558	0.00999	558	0.00927	558	0.00975
559	0.00992	559	0.00985	559	0.0098
560	0.00964	560	0.00954	560	0.00985
561	0.00958	561	0.00954	561	0.0102
562	0.00978	562	0.00933	562	0.0102
563	0.00969	563	0.00933	563	0.01
564	0.00973	564	0.00927	564	0.0098
565	0.00985	565	0.00943	565	0.01005
566	0.00987	566	0.00922	566	0.01005
567	0.01013	567	0.00949	567	0.00938
568	0.00991	568	0.00933	568	0.00975
569	0.00972	569	0.00917	569	0.0098
570	0.00976	570	0.00943	570	0.00975
571	0.00964	571	0.00949	571	0.00959
572	0.00974	572	0.00911	572	0.0099
573	0.00946	573	0.00894	573	0.0099
574	0.00979	574	0.00922	574	0.00985
575	0.01011	575	0.00933	575	0.0099
576	0.00977	576	0.00911	576	0.01005
577	0.00993	577	0.00922	577	0.00975
578	0.0097	578	0.00938	578	0.00985
579	0.00989	579	0.009	579	0.00985
580	0.00965	580	0.00906	580	0.00949
581	0.00972	581	0.00938	581	0.0098
582	0.00977	582	0.00917	582	0.00964
583	0.00949	583	0.00917	583	0.0101
584	0.00939	584	0.00883	584	0.01005
585	0.00922	585	0.00927	585	0.01
586	0.00974	586	0.009	586	0.00938
587	0.00972	587	0.00849	587	0.00954
588	0.0095	588	0.00933	588	0.0097
589	0.00974	589	0.00883	589	0.0097
590	0.01002	590	0.00894	590	0.00975
591	0.00936	591	0.00917	591	0.00943
592	0.00962	592	0.00906	592	0.00933
593	0.00945	593	0.00883	593	0.0098
594	0.00944	594	0.00889	594	0.00943
595	0.00992	595	0.00922	595	0.00927
596	0.00983	596	0.00889	596	0.00943
597	0.00956	597	0.009	597	0.00964
598	0.00949	598	0.00854	598	0.01034
599	0.00931	599	0.00922	599	0.00959
600	0.00958	600	0.00922	600	0.00959
601	0.00946	601	0.00872	601	0.00959
602	0.00946	602	0.00843	602	0.00959
603	0.0092	603	0.00889	603	0.00938
604	0.00969	604	0.009	604	0.00938
605	0.00959	605	0.00883	605	0.00917
606	0.00941	606	0.00883	606	0.00911
607	0.00925	607	0.009	607	0.0097
608	0.00969	608	0.00877	608	0.00954
609	0.00964	609	0.00866	609	0.00975
610	0.00909	610	0.00877	610	0.00911
611	0.00961	611	0.00877	611	0.00938
612	0.00958	612	0.00894	612	0.00959
613	0.00927	613	0.00894	613	0.00943
614	0.00986	614	0.00894	614	0.00933
615	0.00939	615	0.00877	615	0.0097
616	0.0094	616	0.00843	616	0.00943
617	0.00969	617	0.00819	617	0.00917
618	0.0095	618	0.00906	618	0.00938
619	0.00936	619	0.00883	619	0.00943
620	0.00954	620	0.00883	620	0.00933
621	0.00901	621	0.00906	621	0.00949
622	0.00938	622	0.00866	622	0.00922
623	0.00921	623	0.00872	623	0.00954
624	0.00917	624	0.00889	624	0.00964
625	0.00972	625	0.00889	625	0.00927
626	0.00936	626	0.00877	626	0.00917
627	0.00919	627	0.00906	627	0.00917
628	0.0093	628	0.00889	628	0.00877
629	0.00921	629	0.00849	629	0.00911
630	0.00923	630	0.00872	630	0.00943
631	0.00896	631	0.00872	631	0.00943
632	0.0092	632	0.00872	632	0.00954
633	0.00925	633	0.00866	633	0.00927
634	0.00939	634	0.00883	634	0.009
635	0.00914	635	0.00849	635	0.00933
636	0.00917	636	0.00854	636	0.00889
637	0.00933	637	0.00854	637	0.00922
638	0.00954	638	0.00843	638	0.00906
639	0.00935	639	0.00889	639	0.00917
640	0.00946	640	0.00854	640	0.00938
641	0.00904	641	0.00854	641	0.00938
642	0.00909	642	0.00872	642	0.009
643	0.00921	643	0.0086	643	0.00894
644	0.00917	644	0.00849	644	0.00959
645	0.00926	645	0.00866	645	0.00889
646	0.00937	646	0.00889	646	0.00927
647	0.00914	647	0.00872	647	0.00927
648	0.00926	648	0.00837	648	0.00938
649	0.00934	649	0.00866	649	0.00938
650	0.00924	650	0.00843	650	0.00911
651	0.00908	651	0.00819	651	0.00911
652	0.00929	652	0.00894	652	0.00911
653	0.0093	653	0.00819	653	0.00922
654	0.00896	654	0.00843	654	0.0086
655	0.00938	655	0.00877	655	0.00938
656	0.00878	656	0.009	656	0.00894
657	0.0091	657	0.00837	657	0.009
658	0.00927	658	0.00831	658	0.00927
659	0.00898	659	0.00831	659	0.009
660	0.00924	660	0.00843	660	0.00906
661	0.00909	661	0.00843	661	0.0086
662	0.00888	662	0.00837	662	0.00894
663	0.00881	663	0.00843	663	0.00872
664	0.00948	664	0.00812	664	0.00933
665	0.00917	665	0.00831	665	0.00927
666	0.00893	666	0.00812	666	0.00906
667	0.00893	667	0.00866	667	0.00906
668	0.00895	668	0.0086	668	0.00922
669	0.00913	669	0.00831	669	0.00927
670	0.00878	670	0.00831	670	0.00877
671	0.00916	671	0.00837	671	0.00889
672	0.00903	672	0.00843	672	0.00933
673	0.00931	673	0.00854	673	0.00866
674	0.00911	674	0.00866	674	0.00917
675	0.00908	675	0.00825	675	0.00877
676	0.00882	676	0.00843	676	0.00877
677	0.00894	677	0.00819	677	0.00922
678	0.00868	678	0.00825	678	0.00877
679	0.00884	679	0.00794	679	0.00933
680	0.00873	680	0.00831	680	0.00906
681	0.0091	681	0.00812	681	0.00877
682	0.00911	682	0.008	682	0.00883
683	0.00893	683	0.00854	683	0.00883
684	0.00905	684	0.0086	684	0.00906
685	0.00923	685	0.00837	685	0.00927
686	0.00917	686	0.00843	686	0.009
687	0.00906	687	0.00825	687	0.0086
688	0.00901	688	0.00794	688	0.00872
689	0.00874	689	0.00825	689	0.00894
690	0.00883	690	0.008	690	0.00894
691	0.00866	691	0.00819	691	0.00872
692	0.00903	692	0.00831	692	0.00872
693	0.00904	693	0.00819	693	0.00866
694	0.00942	694	0.00843	694	0.00883
695	0.00887	695	0.00819	695	0.00877
696	0.00882	696	0.00812	696	0.00883
697	0.00868	697	0.00831	697	0.00849
698	0.00875	698	0.00849	698	0.00911
699	0.00869	699	0.00825	699	0.0086
700	0.00861	700	0.00806	700	0.00883
701	0.00878	701	0.00849	701	0.00894
702	0.00887	702	0.0086	702	0.00883
703	0.00864	703	0.00794	703	0.00917
704	0.00861	704	0.00812	704	0.00872
705	0.0087	705	0.00806	705	0.009
706	0.00924	706	0.00812	706	0.00917
707	0.00854	707	0.00849	707	0.00843
708	0.00867	708	0.00768	708	0.00877
709	0.0086	709	0.008	709	0.00894
710	0.00887	710	0.00854	710	0.00883
711	0.00903	711	0.00775	711	0.00849
712	0.00876	712	0.00837	712	0.00894
713	0.00892	713	0.00812	713	0.00917
714	0.00896	714	0.00794	714	0.00837
715	0.00864	715	0.008	715	0.0086
716	0.00869	716	0.00831	716	0.0086
717	0.00871	717	0.00831	717	0.00894
718	0.00869	718	0.00849	718	0.0086
719	0.00891	719	0.00812	719	0.00872
720	0.00848	720	0.00781	720	0.00877
721	0.00863	721	0.00825	721	0.00889
722	0.00882	722	0.00787	722	0.00866
723	0.00875	723	0.00831	723	0.00906
724	0.00845	724	0.00825	724	0.00894
725	0.00895	725	0.008	725	0.00872
726	0.00853	726	0.00831	726	0.0086
727	0.0085	727	0.00837	727	0.00843
728	0.00848	728	0.00819	728	0.00866
729	0.00876	729	0.00787	729	0.009
730	0.00853	730	0.00819	730	0.00831
731	0.00881	731	0.00794	731	0.0086
732	0.00893	732	0.00819	732	0.00877
733	0.008	733	0.00787	733	0.00854
734	0.00851	734	0.00806	734	0.00843
735	0.00875	735	0.00819	735	0.00866
736	0.00838	736	0.00806	736	0.00877
737	0.0087	737	0.00849	737	0.00849
738	0.00879	738	0.00806	738	0.0086
739	0.00896	739	0.00806	739	0.00843
740	0.00856	740	0.00794	740	0.00854
741	0.00868	741	0.00787	741	0.009
742	0.0085	742	0.00806	742	0.00837
743	0.0088	743	0.00794	743	0.00843
744	0.00847	744	0.00812	744	0.00872
745	0.00865	745	0.00787	745	0.00877
746	0.00839	746	0.00812	746	0.00831
747	0.00844	747	0.00812	747	0.00866
748	0.00901	748	0.00825	748	0.00812
749	0.0086	749	0.00806	749	0.0086
750	0.00836	750	0.00787	750	0.00819
751	0.0084	751	0.00762	751	0.00866
752	0.00857	752	0.00806	752	0.00837
753	0.00835	753	0.00812	753	0.00854
754	0.00854	754	0.008	754	0.00837
755	0.00851	755	0.00794	755	0.00866
756	0.00841	756	0.00812	756	0.00812
757	0.00892	757	0.00806	757	0.00843
758	0.00863	758	0.00794	758	0.00843
759	0.00869	759	0.00806	759	0.0086
760	0.00855	760	0.00762	760	0.00849
761	0.00864	761	0.00843	761	0.00872
762	0.0086	762	0.00775	762	0.00854
763	0.00861	763	0.00787	763	0.0086
764	0.00853	764	0.00787	764	0.00837
765	0.00815	765	0.00755	765	0.00854
766	0.00828	766	0.00781	766	0.00825
767	0.0083	767	0.00806	767	0.00883
768	0.00842	768	0.00794	768	0.0086
769	0.00848	769	0.008	769	0.0086
770	0.00852	770	0.00775	770	0.00837
771	0.00838	771	0.00812	771	0.00843
772	0.00835	772	0.008	772	0.00831
773	0.00866	773	0.00806	773	0.00849
774	0.0083	774	0.00748	774	0.00825
775	0.00867	775	0.00787	775	0.00837
776	0.00869	776	0.00794	776	0.00877
777	0.00868	777	0.00794	777	0.00854
778	0.00867	778	0.00819	778	0.00843
779	0.00852	779	0.00748	779	0.00825
780	0.00854	780	0.00768	780	0.00866
781	0.00825	781	0.008	781	0.00812
782	0.00876	782	0.00768	782	0.00849
783	0.00822	783	0.00787	783	0.00889
784	0.00878	784	0.00768	784	0.00819
785	0.0084	785	0.00768	785	0.00819
786	0.00856	786	0.00787	786	0.00849
787	0.00845	787	0.008	787	0.00849
788	0.00818	788	0.00787	788	0.00831
789	0.00832	789	0.00735	789	0.00831
790	0.00829	790	0.00781	790	0.00831
791	0.00821	791	0.00812	791	0.00849
792	0.00834	792	0.00735	792	0.00825
793	0.00836	793	0.00781	793	0.00825
794	0.00827	794	0.00768	794	0.00825
795	0.0083	795	0.00787	795	0.00812
796	0.00879	796	0.00748	796	0.00837
797	0.00864	797	0.008	797	0.00806
798	0.00818	798	0.00787	798	0.00831
799	0.00853	799	0.00794	799	0.00831
800	0.00831	800	0.00781	800	0.00794
801	0.00845	801	0.00762	801	0.00831
802	0.00848	802	0.00825	802	0.00825
803	0.00802	803	0.00775	803	0.00819
804	0.00824	804	0.00755	804	0.00825
805	0.00813	805	0.00768	805	0.00831
806	0.00843	806	0.00735	806	0.00819
807	0.00876	807	0.00768	807	0.00794
808	0.0084	808	0.00775	808	0.00843
809	0.0085	809	0.00787	809	0.00843
810	0.00841	810	0.00748	810	0.00825
811	0.00811	811	0.00762	811	0.00831
812	0.0082	812	0.00775	812	0.00843
813	0.00829	813	0.00787	813	0.00812
814	0.00852	814	0.00721	814	0.00812
815	0.00844	815	0.00787	815	0.00843
816	0.00771	816	0.00762	816	0.008
817	0.00818	817	0.00775	817	0.00825
818	0.00845	818	0.00742	818	0.00819
819	0.0078	819	0.00775	819	0.00825
820	0.00829	820	0.00762	820	0.008
821	0.00817	821	0.00781	821	0.00837
822	0.00813	822	0.00781	822	0.00825
823	0.00822	823	0.00748	823	0.00819
824	0.00829	824	0.00742	824	0.00854
825	0.00806	825	0.00775	825	0.00794
826	0.00831	826	0.00762	826	0.00819
827	0.00811	827	0.00735	827	0.00806
828	0.00793	828	0.00748	828	0.00831
829	0.00809	829	0.00775	829	0.00812
830	0.00818	830	0.00755	830	0.00831
831	0.00797	831	0.00755	831	0.00819
832	0.00812	832	0.00755	832	0.00825
833	0.0081	833	0.00787	833	0.00806
834	0.00804	834	0.00721	834	0.00787
835	0.008	835	0.00762	835	0.00787
836	0.00824	836	0.00768	836	0.00819
837	0.008	837	0.00748	837	0.00762
838	0.00802	838	0.00768	838	0.00781
839	0.0082	839	0.00735	839	0.00837
840	0.00841	840	0.00762	840	0.00781
841	0.00817	841	0.00742	841	0.00837
842	0.00795	842	0.00768	842	0.00831
843	0.00852	843	0.00748	843	0.00806
844	0.00807	844	0.00755	844	0.00825
845	0.00815	845	0.00768	845	0.00781
846	0.008	846	0.00787	846	0.00806
847	0.00785	847	0.00748	847	0.00794
848	0.00788	848	0.00768	848	0.00787
849	0.00843	849	0.00748	849	0.00819
850	0.00781	850	0.00755	850	0.00787
851	0.00806	851	0.00735	851	0.00843
852	0.00802	852	0.00714	852	0.00762
853	0.00815	853	0.00762	853	0.00806
854	0.00818	854	0.00755	854	0.00794
855	0.00803	855	0.00762	855	0.00794
856	0.00812	856	0.00768	856	0.0086
857	0.00801	857	0.00742	857	0.00775
858	0.00819	858	0.00775	858	0.00819
859	0.00821	859	0.00735	859	0.00837
860	0.00775	860	0.00742	860	0.008
861	0.00798	861	0.00735	861	0.00837
862	0.00786	862	0.00714	862	0.00775
863	0.00775	863	0.00748	863	0.00825
864	0.00821	864	0.00714	864	0.008
865	0.00815	865	0.00735	865	0.00787
866	0.00797	866	0.00755	866	0.00831
867	0.00829	867	0.00728	867	0.00781
868	0.00837	868	0.00728	868	0.00787
869	0.00759	869	0.00742	869	0.008
870	0.00813	870	0.00742	870	0.00781
871	0.0081	871	0.00762	871	0.00837
872	0.00785	872	0.00728	872	0.00806
873	0.00772	873	0.00735	873	0.00781
874	0.00807	874	0.00755	874	0.00812
875	0.00812	875	0.00742	875	0.00812
876	0.00817	876	0.00728	876	0.00837
877	0.00773	877	0.00742	877	0.00819
878	0.00786	878	0.00762	878	0.008
879	0.0081	879	0.00762	879	0.008
880	0.00816	880	0.00728	880	0.00762
881	0.00794	881	0.00768	881	0.00825
882	0.00778	882	0.00768	882	0.00768
883	0.00789	883	0.00728	883	0.00831
884	0.00792	884	0.00748	884	0.00775
885	0.00797	885	0.00707	885	0.00843
886	0.00779	886	0.00735	886	0.00755
887	0.00799	887	0.00748	887	0.00787
888	0.00748	888	0.00742	888	0.008
889	0.00791	889	0.00728	889	0.00762
890	0.00791	890	0.00748	890	0.00755
891	0.0078	891	0.00735	891	0.00812
892	0.008	892	0.00728	892	0.00768
893	0.00787	893	0.00714	893	0.00787
894	0.00764	894	0.00755	894	0.00768
895	0.00791	895	0.00728	895	0.00768
896	0.0078	896	0.00735	896	0.00748
897	0.00777	897	0.00707	897	0.00806
898	0.00778	898	0.00742	898	0.00755
899	0.00786	899	0.007	899	0.00806
900	0.00798	900	0.00721	900	0.00742
901	0.00809	901	0.00728	901	0.00812
902	0.00794	902	0.00721	902	0.00742
903	0.00806	903	0.00742	903	0.00787
904	0.00764	904	0.00768	904	0.00742
905	0.00788	905	0.00728	905	0.00812
906	0.00781	906	0.00707	906	0.00781
907	0.00787	907	0.00742	907	0.00794
908	0.00816	908	0.00707	908	0.00812
909	0.00796	909	0.00762	909	0.00812
910	0.00794	910	0.00714	910	0.00794
911	0.00809	911	0.00748	911	0.00794
912	0.00743	912	0.00728	912	0.00762
913	0.00769	913	0.00748	913	0.00794
914	0.00772	914	0.00748	914	0.00742
915	0.00802	915	0.00707	915	0.00748
916	0.00816	916	0.00728	916	0.00768
917	0.00767	917	0.00714	917	0.00775
918	0.00765	918	0.00721	918	0.00794
919	0.00764	919	0.00742	919	0.00748
920	0.00778	920	0.00721	920	0.00775
921	0.00776	921	0.00714	921	0.00775
922	0.0076	922	0.00735	922	0.00794
923	0.00771	923	0.00707	923	0.00775
924	0.00762	924	0.00755	924	0.00762
925	0.00776	925	0.00714	925	0.00775
926	0.00783	926	0.00742	926	0.008
927	0.00774	927	0.00755	927	0.00775
928	0.00819	928	0.00748	928	0.00775
929	0.00736	929	0.00707	929	0.00762
930	0.00779	930	0.00775	930	0.00735
931	0.0079	931	0.00714	931	0.00781
932	0.00773	932	0.00755	932	0.00775
933	0.00806	933	0.007	933	0.00794
934	0.00746	934	0.00762	934	0.00768
935	0.0077	935	0.00728	935	0.00781
936	0.00801	936	0.00735	936	0.00748
937	0.00784	937	0.00714	937	0.00781
938	0.00755	938	0.00721	938	0.00728
939	0.00762	939	0.00707	939	0.00735
940	0.00773	940	0.00728	940	0.00794
941	0.00786	941	0.00735	941	0.00762
942	0.00775	942	0.00714	942	0.00781
943	0.00796	943	0.00707	943	0.00775
944	0.00757	944	0.007	944	0.00781
945	0.008	945	0.00721	945	0.00742
946	0.00761	946	0.00742	946	0.00794
947	0.00767	947	0.00693	947	0.00707
948	0.00777	948	0.00714	948	0.00762
949	0.00777	949	0.00707	949	0.00755
950	0.00779	950	0.00714	950	0.00742
951	0.00736	951	0.007	951	0.00768
952	0.00756	952	0.00728	952	0.00755
953	0.00761	953	0.00714	953	0.00748
954	0.00749	954	0.00735	954	0.00748
955	0.00766	955	0.00735	955	0.00755
956	0.00751	956	0.00693	956	0.00781
957	0.00763	957	0.00714	957	0.00768
958	0.00757	958	0.00735	958	0.00742
959	0.0077	959	0.00693	959	0.00775
960	0.00737	960	0.00686	960	0.00721
961	0.00778	961	0.00678	961	0.00768
962	0.00719	962	0.00755	962	0.00775
963	0.00753	963	0.00742	963	0.00775
964	0.00754	964	0.00707	964	0.00742
965	0.0079	965	0.00693	965	0.00728
966	0.00765	966	0.00721	966	0.00755
967	0.00794	967	0.00671	967	0.00748
968	0.00744	968	0.00714	968	0.00755
969	0.00719	969	0.00693	969	0.00755
970	0.00721	970	0.00728	970	0.00742
971	0.00782	971	0.00707	971	0.00781
972	0.00702	972	0.00707	972	0.00735
973	0.00783	973	0.00742	973	0.00735
974	0.00776	974	0.007	974	0.00775
975	0.00757	975	0.007	975	0.00755
976	0.00807	976	0.00755	976	0.00755
977	0.00743	977	0.00693	977	0.00762
978	0.00765	978	0.00693	978	0.00787
979	0.00734	979	0.00728	979	0.00742
980	0.00788	980	0.00678	980	0.00714
981	0.00775	981	0.00671	981	0.00781
982	0.00751	982	0.00663	982	0.00714
983	0.00736	983	0.00678	983	0.00735
984	0.00747	984	0.00693	984	0.00728
985	0.00801	985	0.00707	985	0.00728
986	0.00785	986	0.00707	986	0.00755
987	0.00788	987	0.00714	987	0.00728
988	0.00753	988	0.00686	988	0.00768
989	0.00715	989	0.007	989	0.00755
990	0.00739	990	0.007	990	0.00728
991	0.00755	991	0.00728	991	0.00781
992	0.00732	992	0.007	992	0.00762
993	0.00735	993	0.00742	993	0.00735
994	0.00762	994	0.00721	994	0.00775
995	0.00765	995	0.007	995	0.00714
996	0.00729	996	0.00693	996	0.00728
997	0.00751	997	0.00663	997	0.00728
998	0.00784	998	0.00671	998	0.00735
999	0.00757	999	0.00663	999	0.00755
1000	0.00751	1000	0.00728	1000	0.00748
1001	0.00737	1001	0.00714	1001	0.00748
1002	0.0075	1002	0.00648	1002	0.00742
1003	0.00728	1003	0.00728	1003	0.00707
1004	0.00713	1004	0.00656	1004	0.00755
1005	0.00765	1005	0.00707	1005	0.00742
1006	0.00754	1006	0.00678	1006	0.00735
1007	0.00751	1007	0.00693	1007	0.00762
1008	0.00763	1008	0.00693	1008	0.00755
1009	0.00751	1009	0.00678	1009	0.00755
1010	0.00744	1010	0.00728	1010	0.00728
1011	0.00748	1011	0.00721	1011	0.00735
1012	0.00761	1012	0.00721	1012	0.007
1013	0.00757	1013	0.00693	1013	0.007
1014	0.00741	1014	0.00721	1014	0.00762
1015	0.00731	1015	0.00671	1015	0.00742
1016	0.00752	1016	0.00656	1016	0.00748
1017	0.00718	1017	0.00693	1017	0.00748
1018	0.00734	1018	0.00714	1018	0.00735
1019	0.00725	1019	0.00714	1019	0.00728
1020	0.00736	1020	0.00686	1020	0.00721
1021	0.00747	1021	0.007	1021	0.00742
1022	0.00736	1022	0.00693	1022	0.00735
1023	0.00756	1023	0.00648	1023	0.00742
1024	0.00742	1024	0.00671	1024	0.00748
1025	0.00723	1025	0.00707	1025	0.00748
1026	0.00772	1026	0.00663	1026	0.00735
1027	0.00757	1027	0.00693	1027	0.00728
1028	0.00739	1028	0.00707	1028	0.00735
1029	0.00749	1029	0.00678	1029	0.00748
1030	0.00786	1030	0.00671	1030	0.00728
1031	0.0075	1031	0.00678	1031	0.00714
1032	0.00763	1032	0.00714	1032	0.00755
1033	0.00725	1033	0.00686	1033	0.00755
1034	0.00731	1034	0.00686	1034	0.00721
1035	0.00719	1035	0.00671	1035	0.00714
1036	0.00719	1036	0.00656	1036	0.00748
1037	0.00743	1037	0.00693	1037	0.00714
1038	0.00732	1038	0.00671	1038	0.00735
1039	0.0074	1039	0.00663	1039	0.00721
1040	0.00759	1040	0.00678	1040	0.00742
1041	0.00753	1041	0.00663	1041	0.00768
1042	0.00768	1042	0.00714	1042	0.00742
1043	0.00722	1043	0.00714	1043	0.00735
1044	0.00731	1044	0.00686	1044	0.00742
1045	0.00718	1045	0.00728	1045	0.00693
1046	0.00737	1046	0.00693	1046	0.007
1047	0.00729	1047	0.00671	1047	0.00748
1048	0.00725	1048	0.00648	1048	0.00707
1049	0.00743	1049	0.00663	1049	0.00714
1050	0.00712	1050	0.00686	1050	0.00693
1051	0.00772	1051	0.00686	1051	0.00714
1052	0.00737	1052	0.00686	1052	0.00721
1053	0.00722	1053	0.00686	1053	0.00728
1054	0.00772	1054	0.00671	1054	0.00728
1055	0.00726	1055	0.00707	1055	0.00728
1056	0.00734	1056	0.00663	1056	0.00762
1057	0.00727	1057	0.00656	1057	0.00762
1058	0.00693	1058	0.00678	1058	0.00714
1059	0.00748	1059	0.00663	1059	0.00728
1060	0.00737	1060	0.00686	1060	0.00735
1061	0.00727	1061	0.007	1061	0.00721
1062	0.00716	1062	0.00656	1062	0.007
1063	0.00751	1063	0.007	1063	0.00721
1064	0.00713	1064	0.00686	1064	0.00748
1065	0.00751	1065	0.00678	1065	0.00721
1066	0.00727	1066	0.00721	1066	0.00721
1067	0.00752	1067	0.007	1067	0.00735
1068	0.00708	1068	0.00671	1068	0.00735
1069	0.0073	1069	0.00656	1069	0.00714
1070	0.00736	1070	0.00686	1070	0.00714
1071	0.00734	1071	0.00693	1071	0.00707
1072	0.00725	1072	0.007	1072	0.00748
1073	0.00735	1073	0.00678	1073	0.00693
1074	0.00718	1074	0.00707	1074	0.00714
1075	0.0072	1075	0.00671	1075	0.00714
1076	0.0075	1076	0.00678	1076	0.007
1077	0.00705	1077	0.007	1077	0.00721
1078	0.0073	1078	0.00671	1078	0.00728
1079	0.00734	1079	0.00663	1079	0.00721
1080	0.0073	1080	0.00678	1080	0.00714
1081	0.007	1081	0.00671	1081	0.00728
1082	0.00728	1082	0.00663	1082	0.00728
1083	0.00719	1083	0.00648	1083	0.00721
1084	0.00724	1084	0.00707	1084	0.00748
1085	0.00753	1085	0.00663	1085	0.00735
1086	0.00725	1086	0.00663	1086	0.00707
1087	0.00712	1087	0.00678	1087	0.00714
1088	0.00731	1088	0.0064	1088	0.00693
1089	0.00741	1089	0.00678	1089	0.00707
1090	0.00724	1090	0.007	1090	0.00728
1091	0.0072	1091	0.00663	1091	0.00707
1092	0.00748	1092	0.00648	1092	0.00714
1093	0.00732	1093	0.00663	1093	0.00728
1094	0.00701	1094	0.00678	1094	0.00755
1095	0.00683	1095	0.00648	1095	0.00686
1096	0.00725	1096	0.00686	1096	0.00686
1097	0.00736	1097	0.00663	1097	0.00742
1098	0.00702	1098	0.00656	1098	0.00707
1099	0.00757	1099	0.00686	1099	0.00707
1100	0.00715	1100	0.00678	1100	0.00728
1101	0.00744	1101	0.00656	1101	0.00686
1102	0.00738	1102	0.00648	1102	0.007
1103	0.00721	1103	0.00678	1103	0.00748
1104	0.00707	1104	0.00714	1104	0.00721
1105	0.00707	1105	0.00678	1105	0.00656
1106	0.0073	1106	0.00656	1106	0.00671
1107	0.00701	1107	0.00656	1107	0.00671
1108	0.007	1108	0.00671	1108	0.007
1109	0.00709	1109	0.00678	1109	0.00693
1110	0.00687	1110	0.00656	1110	0.00721
1111	0.00681	1111	0.0064	1111	0.007
1112	0.00702	1112	0.00686	1112	0.00686
1113	0.00727	1113	0.00671	1113	0.00656
1114	0.00719	1114	0.00648	1114	0.00707
1115	0.00735	1115	0.00663	1115	0.007
1116	0.00695	1116	0.0064	1116	0.007
1117	0.00718	1117	0.00671	1117	0.00714
1118	0.00684	1118	0.00678	1118	0.007
1119	0.00731	1119	0.00663	1119	0.00693
1120	0.00719	1120	0.00686	1120	0.00686
1121	0.00729	1121	0.0064	1121	0.00686
1122	0.00703	1122	0.00663	1122	0.00742
1123	0.00718	1123	0.00656	1123	0.00693
1124	0.00726	1124	0.00632	1124	0.00678
1125	0.00701	1125	0.00671	1125	0.00678
1126	0.00706	1126	0.00707	1126	0.007
1127	0.00741	1127	0.0064	1127	0.007
1128	0.007	1128	0.00671	1128	0.00678
1129	0.00739	1129	0.00707	1129	0.00714
1130	0.00731	1130	0.00671	1130	0.00728
1131	0.00713	1131	0.00648	1131	0.00678
1132	0.00734	1132	0.00656	1132	0.00714
1133	0.00688	1133	0.00686	1133	0.00728
1134	0.0073	1134	0.00663	1134	0.007
1135	0.00687	1135	0.00671	1135	0.007
1136	0.00678	1136	0.00648	1136	0.00735
1137	0.00735	1137	0.00678	1137	0.00686
1138	0.00715	1138	0.00671	1138	0.00648
1139	0.0069	1139	0.0064	1139	0.00671
1140	0.00717	1140	0.00656	1140	0.00686
1141	0.00707	1141	0.00678	1141	0.00678
1142	0.00745	1142	0.00671	1142	0.00721
1143	0.00704	1143	0.0064	1143	0.00663
1144	0.00693	1144	0.00624	1144	0.007
1145	0.0069	1145	0.00656	1145	0.00721
1146	0.00713	1146	0.00648	1146	0.00671
1147	0.00709	1147	0.00648	1147	0.007
1148	0.00716	1148	0.00671	1148	0.00686
1149	0.00691	1149	0.00686	1149	0.00686
1150	0.0072	1150	0.00648	1150	0.00714
1151	0.00709	1151	0.00656	1151	0.00714
1152	0.00713	1152	0.00663	1152	0.00686
1153	0.00703	1153	0.00624	1153	0.00707
1154	0.00708	1154	0.00656	1154	0.00678
1155	0.00718	1155	0.00648	1155	0.007
1156	0.00681	1156	0.00624	1156	0.00671
1157	0.00729	1157	0.00656	1157	0.00678
1158	0.00713	1158	0.00663	1158	0.00686
1159	0.00688	1159	0.00663	1159	0.00707
1160	0.00742	1160	0.00686	1160	0.00693
1161	0.00714	1161	0.00663	1161	0.00693
1162	0.0069	1162	0.0064	1162	0.007
1163	0.0071	1163	0.0064	1163	0.00686
1164	0.00701	1164	0.00671	1164	0.00686
1165	0.00668	1165	0.00663	1165	0.00663
1166	0.00702	1166	0.0064	1166	0.007
1167	0.00701	1167	0.00663	1167	0.00721
1168	0.00656	1168	0.00693	1168	0.00728
1169	0.00725	1169	0.00671	1169	0.00721
1170	0.00701	1170	0.00656	1170	0.00742
1171	0.00704	1171	0.00648	1171	0.007
1172	0.00741	1172	0.00648	1172	0.00686
1173	0.00687	1173	0.00707	1173	0.007
1174	0.00723	1174	0.00624	1174	0.00721
1175	0.00697	1175	0.00608	1175	0.00714
1176	0.007	1176	0.0064	1176	0.00693
1177	0.00698	1177	0.00671	1177	0.00693
1178	0.00678	1178	0.00678	1178	0.00693
1179	0.00693	1179	0.0064	1179	0.00686
1180	0.0071	1180	0.00616	1180	0.00707
1181	0.00679	1181	0.00592	1181	0.00686
1182	0.00661	1182	0.0064	1182	0.007
1183	0.00707	1183	0.00608	1183	0.00721
1184	0.00714	1184	0.00663	1184	0.00686
1185	0.00721	1185	0.00624	1185	0.00663
1186	0.00693	1186	0.0064	1186	0.00656
1187	0.00711	1187	0.00663	1187	0.00671
1188	0.00663	1188	0.00592	1188	0.00671
1189	0.00714	1189	0.00616	1189	0.00648
1190	0.00711	1190	0.00663	1190	0.00663
1191	0.00698	1191	0.00678	1191	0.00671
1192	0.00693	1192	0.00648	1192	0.00671
1193	0.00695	1193	0.00671	1193	0.00656
1194	0.00715	1194	0.00648	1194	0.00656
1195	0.00697	1195	0.00663	1195	0.00671
1196	0.00693	1196	0.00624	1196	0.00693
1197	0.00651	1197	0.00648	1197	0.00663
1198	0.00664	1198	0.00624	1198	0.00671
1199	0.00705	1199	0.00616	1199	0.00671
1200	0.00684	1200	0.00624	1200	0.00671
1201	0.00695	1201	0.0064	1201	0.00693
1202	0.00683	1202	0.00624	1202	0.00728
1203	0.00648	1203	0.00632	1203	0.007
1204	0.00689	1204	0.0064	1204	0.00663
1205	0.00721	1205	0.00656	1205	0.00671
1206	0.00662	1206	0.00648	1206	0.00678
1207	0.00668	1207	0.00656	1207	0.00678
1208	0.00667	1208	0.00616	1208	0.0064
1209	0.00713	1209	0.00616	1209	0.00671
1210	0.00702	1210	0.00656	1210	0.00678
1211	0.00658	1211	0.00663	1211	0.00686
1212	0.00706	1212	0.00632	1212	0.00678
1213	0.00731	1213	0.0064	1213	0.00671
1214	0.00686	1214	0.00624	1214	0.00686
1215	0.00704	1215	0.00616	1215	0.00686
1216	0.00679	1216	0.00648	1216	0.00663
1217	0.00658	1217	0.0064	1217	0.00678
1218	0.00664	1218	0.00592	1218	0.00663
1219	0.00703	1219	0.006	1219	0.00678
1220	0.00663	1220	0.00671	1220	0.00678
1221	0.0067	1221	0.00671	1221	0.00707
1222	0.00688	1222	0.00608	1222	0.00678
1223	0.00662	1223	0.00616	1223	0.00656
1224	0.00681	1224	0.0064	1224	0.00686
1225	0.0068	1225	0.00583	1225	0.00678
1226	0.00676	1226	0.0064	1226	0.00671
1227	0.00695	1227	0.00608	1227	0.00686
1228	0.00698	1228	0.00608	1228	0.007
1229	0.00648	1229	0.006	1229	0.00663
1230	0.00698	1230	0.006	1230	0.00648
1231	0.0069	1231	0.00656	1231	0.00656
1232	0.00655	1232	0.00632	1232	0.00693
1233	0.00678	1233	0.00632	1233	0.007
1234	0.00712	1234	0.00592	1234	0.00648
1235	0.00721	1235	0.00632	1235	0.00648
1236	0.00663	1236	0.0064	1236	0.00671
1237	0.00652	1237	0.00608	1237	0.00671
1238	0.00686	1238	0.00624	1238	0.00656
1239	0.00659	1239	0.00656	1239	0.00671
1240	0.00672	1240	0.0064	1240	0.00663
1241	0.00651	1241	0.00624	1241	0.00671
1242	0.00689	1242	0.00592	1242	0.00656
1243	0.00679	1243	0.00592	1243	0.00678
1244	0.00676	1244	0.00608	1244	0.00678
1245	0.00675	1245	0.00624	1245	0.00656
1246	0.00712	1246	0.00616	1246	0.00656
1247	0.00709	1247	0.00624	1247	0.00656
1248	0.00664	1248	0.00624	1248	0.0064
1249	0.00729	1249	0.00583	1249	0.00656
1250	0.00689	1250	0.00624	1250	0.00663
1251	0.00644	1251	0.00616	1251	0.00678
1252	0.00714	1252	0.00648	1252	0.00686
1253	0.00689	1253	0.00624	1253	0.00663
1254	0.00658	1254	0.00608	1254	0.00663
1255	0.00664	1255	0.00616	1255	0.00624
1256	0.00709	1256	0.00616	1256	0.00632
1257	0.00689	1257	0.00624	1257	0.00632
1258	0.00655	1258	0.006	1258	0.00648
1259	0.00659	1259	0.006	1259	0.00721
1260	0.00655	1260	0.00583	1260	0.00693
1261	0.00681	1261	0.00624	1261	0.00656
1262	0.00683	1262	0.0064	1262	0.00663
1263	0.00669	1263	0.00632	1263	0.00678
1264	0.00677	1264	0.00616	1264	0.00678
1265	0.00694	1265	0.00671	1265	0.00648
1266	0.00704	1266	0.00648	1266	0.00648
1267	0.0068	1267	0.00624	1267	0.0064
1268	0.00693	1268	0.00616	1268	0.00656
1269	0.0066	1269	0.0064	1269	0.00656
1270	0.00667	1270	0.00624	1270	0.0064
1271	0.00689	1271	0.00616	1271	0.00663
1272	0.00634	1272	0.0064	1272	0.00678
1273	0.00659	1273	0.00671	1273	0.00707
1274	0.00714	1274	0.006	1274	0.00648
1275	0.00657	1275	0.00574	1275	0.00656
1276	0.0066	1276	0.00608	1276	0.00648
1277	0.00673	1277	0.00624	1277	0.00728
1278	0.00677	1278	0.00608	1278	0.00663
1279	0.00689	1279	0.00583	1279	0.00648
1280	0.00655	1280	0.00616	1280	0.00656
1281	0.00703	1281	0.00608	1281	0.00663
1282	0.00675	1282	0.00616	1282	0.00671
1283	0.00652	1283	0.00608	1283	0.00671
1284	0.00669	1284	0.0064	1284	0.00648
1285	0.00663	1285	0.00616	1285	0.0064
1286	0.00655	1286	0.00616	1286	0.00648
1287	0.00676	1287	0.00624	1287	0.00671
1288	0.00678	1288	0.00632	1288	0.00686
1289	0.00695	1289	0.00656	1289	0.00678
1290	0.00663	1290	0.00583	1290	0.00671
1291	0.00664	1291	0.00616	1291	0.00648
1292	0.00697	1292	0.00632	1292	0.00648
1293	0.00683	1293	0.00632	1293	0.00663
1294	0.00646	1294	0.00624	1294	0.00648
1295	0.00618	1295	0.006	1295	0.00648
1296	0.00655	1296	0.00616	1296	0.00671
1297	0.0064	1297	0.00592	1297	0.00671
1298	0.00672	1298	0.00608	1298	0.00671
1299	0.00675	1299	0.00616	1299	0.007
1300	0.0067	1300	0.006	1300	0.00648
1301	0.0069	1301	0.00616	1301	0.00656
1302	0.00675	1302	0.00616	1302	0.00632
1303	0.00666	1303	0.00624	1303	0.00648
1304	0.00674	1304	0.00624	1304	0.00648
1305	0.00651	1305	0.00574	1305	0.00648
1306	0.00692	1306	0.00608	1306	0.00678
1307	0.00672	1307	0.00583	1307	0.00632
1308	0.00673	1308	0.00592	1308	0.00632
1309	0.00659	1309	0.00624	1309	0.00656
1310	0.00639	1310	0.00616	1310	0.00656
1311	0.00625	1311	0.00592	1311	0.00656
1312	0.00641	1312	0.00624	1312	0.00632
1313	0.00642	1313	0.00624	1313	0.00632
1314	0.00666	1314	0.0064	1314	0.00624
1315	0.00658	1315	0.00592	1315	0.00632
1316	0.00677	1316	0.00592	1316	0.00671
1317	0.00665	1317	0.00574	1317	0.00663
1318	0.00673	1318	0.00583	1318	0.00616
1319	0.00679	1319	0.00592	1319	0.00616
1320	0.00664	1320	0.00632	1320	0.00624
1321	0.0066	1321	0.00592	1321	0.0064
1322	0.00664	1322	0.00592	1322	0.00608
1323	0.00685	1323	0.00608	1323	0.00616
1324	0.00659	1324	0.00624	1324	0.00648
1325	0.00642	1325	0.0064	1325	0.00616
1326	0.00638	1326	0.00583	1326	0.0064
1327	0.00688	1327	0.00608	1327	0.00671
1328	0.00677	1328	0.006	1328	0.00671
1329	0.00671	1329	0.00566	1329	0.00656
1330	0.00681	1330	0.00583	1330	0.00648
1331	0.00648	1331	0.00616	1331	0.00671
1332	0.00629	1332	0.00583	1332	0.00648
1333	0.00654	1333	0.00574	1333	0.00616
1334	0.00681	1334	0.006	1334	0.00671
1335	0.0065	1335	0.00616	1335	0.00656
1336	0.00681	1336	0.00632	1336	0.00678
1337	0.0066	1337	0.00616	1337	0.00678
1338	0.00661	1338	0.00566	1338	0.00686
1339	0.00688	1339	0.00574	1339	0.0064
1340	0.00673	1340	0.00539	1340	0.00663
1341	0.00671	1341	0.00624	1341	0.00648
1342	0.00667	1342	0.00608	1342	0.00648
1343	0.00624	1343	0.00574	1343	0.00656
1344	0.00667	1344	0.00608	1344	0.00656
1345	0.00673	1345	0.00592	1345	0.00671
1346	0.00663	1346	0.00592	1346	0.00663
1347	0.00666	1347	0.00608	1347	0.00671
1348	0.00679	1348	0.00608	1348	0.00686
1349	0.00667	1349	0.00592	1349	0.00686
1350	0.00646	1350	0.006	1350	0.00624
1351	0.00638	1351	0.00566	1351	0.00656
1352	0.00658	1352	0.00557	1352	0.00663
1353	0.00651	1353	0.00616	1353	0.00656
1354	0.00644	1354	0.00557	1354	0.00608
1355	0.00649	1355	0.00592	1355	0.00616
1356	0.00632	1356	0.00592	1356	0.00616
1357	0.00642	1357	0.006	1357	0.00663
1358	0.00643	1358	0.006	1358	0.00656
1359	0.00667	1359	0.00616	1359	0.00624
1360	0.00668	1360	0.00583	1360	0.00632
1361	0.00667	1361	0.00566	1361	0.00686
1362	0.00676	1362	0.00557	1362	0.00663
1363	0.00653	1363	0.00616	1363	0.00648
1364	0.00637	1364	0.00632	1364	0.00648
1365	0.0064	1365	0.00608	1365	0.00656
1366	0.00624	1366	0.006	1366	0.00671
1367	0.00693	1367	0.006	1367	0.00656
1368	0.00639	1368	0.00574	1368	0.00678
1369	0.00622	1369	0.00583	1369	0.00624
1370	0.00661	1370	0.00624	1370	0.0064
1371	0.00648	1371	0.00608	1371	0.00608
1372	0.00643	1372	0.00592	1372	0.0064
1373	0.00618	1373	0.00566	1373	0.00632
1374	0.00649	1374	0.00583	1374	0.00616
1375	0.00633	1375	0.00616	1375	0.0064
1376	0.00635	1376	0.00583	1376	0.00624
1377	0.00657	1377	0.00608	1377	0.00624
1378	0.0066	1378	0.00616	1378	0.00678
1379	0.00629	1379	0.006	1379	0.00624
1380	0.00626	1380	0.00574	1380	0.00656
1381	0.0067	1381	0.00566	1381	0.00592
1382	0.00651	1382	0.006	1382	0.00592
1383	0.00652	1383	0.00624	1383	0.00608
1384	0.00634	1384	0.00574	1384	0.006
1385	0.00624	1385	0.00557	1385	0.00592
1386	0.00627	1386	0.00616	1386	0.00648
1387	0.00656	1387	0.00608	1387	0.00678
1388	0.00636	1388	0.00608	1388	0.00648
1389	0.00652	1389	0.00592	1389	0.00648
1390	0.00634	1390	0.006	1390	0.00624
1391	0.00658	1391	0.006	1391	0.0064
1392	0.00646	1392	0.00616	1392	0.00632
1393	0.0064	1393	0.00583	1393	0.00608
1394	0.00611	1394	0.00592	1394	0.00608
1395	0.00658	1395	0.00616	1395	0.00583
1396	0.00659	1396	0.00608	1396	0.00632
1397	0.0066	1397	0.00583	1397	0.00624
1398	0.00668	1398	0.00592	1398	0.00656
1399	0.00651	1399	0.00583	1399	0.00656
1400	0.00614	1400	0.00608	1400	0.00693
1401	0.00668	1401	0.00624	1401	0.00648
1402	0.00645	1402	0.006	1402	0.0064
1403	0.00641	1403	0.00583	1403	0.00592
1404	0.00634	1404	0.00583	1404	0.00592
1405	0.00624	1405	0.00574	1405	0.006
1406	0.00668	1406	0.006	1406	0.00608
1407	0.00661	1407	0.00632	1407	0.00624
1408	0.0064	1408	0.00574	1408	0.00616
1409	0.00619	1409	0.00557	1409	0.00616
1410	0.00653	1410	0.00592	1410	0.00616
1411	0.00686	1411	0.00616	1411	0.00648
1412	0.00652	1412	0.00592	1412	0.00678
1413	0.00658	1413	0.00574	1413	0.00632
1414	0.0063	1414	0.00574	1414	0.0064
1415	0.00642	1415	0.00592	1415	0.00632
1416	0.00668	1416	0.00566	1416	0.00616
1417	0.00637	1417	0.00574	1417	0.00624
1418	0.00593	1418	0.00539	1418	0.00632
1419	0.00638	1419	0.00608	1419	0.006
1420	0.00661	1420	0.006	1420	0.00608
1421	0.00629	1421	0.00592	1421	0.00616
1422	0.00648	1422	0.00574	1422	0.00632
1423	0.00625	1423	0.00574	1423	0.00671
1424	0.00623	1424	0.00592	1424	0.00678
1425	0.00658	1425	0.00574	1425	0.00656
1426	0.00699	1426	0.00574	1426	0.00656
1427	0.00653	1427	0.00583	1427	0.00616
1428	0.00626	1428	0.00566	1428	0.00616
1429	0.00624	1429	0.00548	1429	0.0064
1430	0.00619	1430	0.00583	1430	0.00648
1431	0.00623	1431	0.00583	1431	0.00592
1432	0.00685	1432	0.00583	1432	0.00608
1433	0.00674	1433	0.00574	1433	0.00592
1434	0.00628	1434	0.00574	1434	0.00656
1435	0.00641	1435	0.00566	1435	0.00678
1436	0.00642	1436	0.00592	1436	0.0064
1437	0.00645	1437	0.00592	1437	0.00616
1438	0.00651	1438	0.00616	1438	0.00608
1439	0.00648	1439	0.00592	1439	0.00632
1440	0.00624	1440	0.00557	1440	0.00624
1441	0.0062	1441	0.00548	1441	0.00624
1442	0.00639	1442	0.00548	1442	0.0064
1443	0.00647	1443	0.00583	1443	0.00616
1444	0.00658	1444	0.006	1444	0.0064
1445	0.00638	1445	0.00583	1445	0.00624
1446	0.00655	1446	0.00583	1446	0.00624
1447	0.0063	1447	0.00557	1447	0.00592
1448	0.00627	1448	0.00566	1448	0.006
1449	0.00634	1449	0.00592	1449	0.00624
1450	0.00612	1450	0.00566	1450	0.00616
1451	0.00626	1451	0.00592	1451	0.00632
1452	0.00648	1452	0.00574	1452	0.00616
1453	0.00625	1453	0.00583	1453	0.00583
1454	0.00598	1454	0.00557	1454	0.00583
1455	0.00638	1455	0.00566	1455	0.00616
1456	0.00643	1456	0.00548	1456	0.00616
1457	0.00623	1457	0.00583	1457	0.00616
1458	0.00614	1458	0.006	1458	0.00608
1459	0.00644	1459	0.006	1459	0.00616
1460	0.006	1460	0.00608	1460	0.00574
1461	0.00608	1461	0.00592	1461	0.00574
1462	0.00657	1462	0.006	1462	0.00583
1463	0.00639	1463	0.00592	1463	0.006
1464	0.00625	1464	0.00566	1464	0.0064
1465	0.00633	1465	0.00557	1465	0.00592
1466	0.00618	1466	0.00539	1466	0.00608
1467	0.00619	1467	0.006	1467	0.00608
1468	0.00607	1468	0.006	1468	0.00566
1469	0.0064	1469	0.00583	1469	0.00608
1470	0.00609	1470	0.00539	1470	0.00608
1471	0.00618	1471	0.00557	1471	0.006
1472	0.00626	1472	0.00574	1472	0.00592
1473	0.0065	1473	0.00616	1473	0.00616
1474	0.00624	1474	0.00608	1474	0.00616
1475	0.006	1475	0.00583	1475	0.00608
1476	0.00589	1476	0.00574	1476	0.00592
1477	0.00599	1477	0.00566	1477	0.00632
1478	0.00628	1478	0.006	1478	0.00608
1479	0.00647	1479	0.00566	1479	0.00608
1480	0.00626	1480	0.00574	1480	0.00592
1481	0.00598	1481	0.00566	1481	0.006
1482	0.00616	1482	0.00574	1482	0.00632
1483	0.00627	1483	0.00574	1483	0.00616
1484	0.00608	1484	0.00548	1484	0.00592
1485	0.00624	1485	0.00566	1485	0.00624
1486	0.00661	1486	0.00548	1486	0.0064
1487	0.00601	1487	0.00616	1487	0.00616
1488	0.006	1488	0.00616	1488	0.00616
1489	0.00616	1489	0.00608	1489	0.00624
1490	0.0064	1490	0.00592	1490	0.006
1491	0.00624	1491	0.00583	1491	0.00616
1492	0.00613	1492	0.00557	1492	0.00648
1493	0.00623	1493	0.00548	1493	0.00632
1494	0.00584	1494	0.00592	1494	0.00616
1495	0.00601	1495	0.00574	1495	0.00663
1496	0.0061	1496	0.00574	1496	0.00656
1497	0.00628	1497	0.006	1497	0.0064
1498	0.00594	1498	0.006	1498	0.00632
1499	0.00642	1499	0.00566	1499	0.006
1500	0.00646	1500	0.00574	1500	0.00583
1501	0.00601	1501	0.00583	1501	0.00608
1502	0.00578	1502	0.00566	1502	0.00608
1503	0.00584	1503	0.00592	1503	0.00616
1504	0.00631	1504	0.00574	1504	0.00574
1505	0.0063	1505	0.00566	1505	0.00592
1506	0.00625	1506	0.00548	1506	0.00624
1507	0.00621	1507	0.00539	1507	0.00616
1508	0.00624	1508	0.00548	1508	0.00632
1509	0.00573	1509	0.00566	1509	0.0064
1510	0.00592	1510	0.00548	1510	0.00616
1511	0.00636	1511	0.00566	1511	0.00592
1512	0.00615	1512	0.00566	1512	0.00566
1513	0.00609	1513	0.00566	1513	0.00557
1514	0.00626	1514	0.00583	1514	0.00566
1515	0.00618	1515	0.00583	1515	0.006
1516	0.00605	1516	0.00592	1516	0.006
1517	0.00628	1517	0.00566	1517	0.006
1518	0.0062	1518	0.00592	1518	0.00592
1519	0.00612	1519	0.00592	1519	0.00608
1520	0.00605	1520	0.00566	1520	0.00608
1521	0.00646	1521	0.00539	1521	0.006
1522	0.00646	1522	0.00574	1522	0.006
1523	0.00634	1523	0.00566	1523	0.00583
1524	0.0061	1524	0.00548	1524	0.00616
1525	0.00625	1525	0.00566	1525	0.006
1526	0.00588	1526	0.00539	1526	0.00583
1527	0.006	1527	0.00574	1527	0.00566
1528	0.00613	1528	0.00566	1528	0.00566
1529	0.00635	1529	0.006	1529	0.00574
1530	0.00609	1530	0.00583	1530	0.00583
1531	0.00637	1531	0.00583	1531	0.00574
1532	0.00625	1532	0.00574	1532	0.00557
1533	0.00638	1533	0.00592	1533	0.00566
1534	0.00625	1534	0.00583	1534	0.00592
1535	0.00621	1535	0.00539	1535	0.00624
1536	0.00626	1536	0.00557	1536	0.006
1537	0.00625	1537	0.00557	1537	0.00557
1538	0.00601	1538	0.00539	1538	0.00592
1539	0.00629	1539	0.00539	1539	0.006
1540	0.00638	1540	0.00557	1540	0.00616
1541	0.00601	1541	0.00583	1541	0.00574
1542	0.00617	1542	0.00574	1542	0.00557
1543	0.0064	1543	0.00583	1543	0.00566
1544	0.00665	1544	0.00574	1544	0.00539
1545	0.00643	1545	0.00592	1545	0.00608
1546	0.00636	1546	0.00566	1546	0.00624
1547	0.00628	1547	0.00548	1547	0.00608
1548	0.00574	1548	0.00529	1548	0.006
1549	0.00587	1549	0.00557	1549	0.00608
1550	0.00592	1550	0.00557	1550	0.00592
1551	0.00606	1551	0.00574	1551	0.00616
1552	0.00645	1552	0.00574	1552	0.00608
1553	0.00628	1553	0.00566	1553	0.006
1554	0.00602	1554	0.00548	1554	0.006
1555	0.00611	1555	0.00566	1555	0.00583
1556	0.00625	1556	0.00566	1556	0.00608
1557	0.00619	1557	0.006	1557	0.00608
1558	0.00637	1558	0.00566	1558	0.00592
1559	0.00629	1559	0.00539	1559	0.00574
1560	0.00602	1560	0.00557	1560	0.00608
1561	0.00612	1561	0.00574	1561	0.00624
1562	0.00576	1562	0.00574	1562	0.00616
1563	0.00596	1563	0.00566	1563	0.0064
1564	0.00603	1564	0.00548	1564	0.00608
1565	0.00593	1565	0.00548	1565	0.00583
1566	0.00612	1566	0.00539	1566	0.006
1567	0.00589	1567	0.00529	1567	0.00574
1568	0.00574	1568	0.00566	1568	0.00583
1569	0.00588	1569	0.00566	1569	0.006
1570	0.00606	1570	0.00557	1570	0.006
1571	0.00637	1571	0.00539	1571	0.00608
1572	0.00607	1572	0.00548	1572	0.00592
1573	0.00591	1573	0.00574	1573	0.00592
1574	0.0061	1574	0.00574	1574	0.00574
1575	0.00645	1575	0.00557	1575	0.00574
1576	0.00608	1576	0.00557	1576	0.00583
1577	0.006	1577	0.0052	1577	0.00608
1578	0.00594	1578	0.00529	1578	0.00592
1579	0.00611	1579	0.00557	1579	0.00574
1580	0.00568	1580	0.00566	1580	0.00566
1581	0.006	1581	0.00529	1581	0.00574
1582	0.00621	1582	0.00539	1582	0.00608
1583	0.00623	1583	0.00557	1583	0.0064
1584	0.00587	1584	0.00529	1584	0.00616
1585	0.00592	1585	0.00574	1585	0.00592
1586	0.00603	1586	0.00574	1586	0.00608
1587	0.00605	1587	0.00574	1587	0.0064
1588	0.00601	1588	0.00574	1588	0.00608
1589	0.00597	1589	0.00566	1589	0.006
1590	0.00595	1590	0.00574	1590	0.006
1591	0.00608	1591	0.00574	1591	0.00583
1592	0.00602	1592	0.00539	1592	0.00592
1593	0.00591	1593	0.00548	1593	0.00566
1594	0.0061	1594	0.00529	1594	0.00583
1595	0.00596	1595	0.0052	1595	0.00566
1596	0.00604	1596	0.00539	1596	0.00574
1597	0.00602	1597	0.00548	1597	0.00592
1598	0.00593	1598	0.00566	1598	0.006
1599	0.00607	1599	0.00574	1599	0.00574
1600	0.00568	1600	0.00557	1600	0.00583
1601	0.00586	1601	0.00574	1601	0.00574
1602	0.00607	1602	0.00583	1602	0.00616
1603	0.00605	1603	0.00566	1603	0.00616
1604	0.00591	1604	0.00557	1604	0.00592
1605	0.00596	1605	0.00548	1605	0.00592
1606	0.00598	1606	0.00529	1606	0.006
1607	0.00597	1607	0.00539	1607	0.00574
1608	0.00553	1608	0.00529	1608	0.00608
1609	0.00585	1609	0.00548	1609	0.00566
1610	0.00599	1610	0.00574	1610	0.00548
1611	0.006	1611	0.00548	1611	0.00574
1612	0.00605	1612	0.00529	1612	0.00592
1613	0.00589	1613	0.00548	1613	0.00583
1614	0.00626	1614	0.00592	1614	0.00574
1615	0.00618	1615	0.00592	1615	0.00574
1616	0.00612	1616	0.006	1616	0.00566
1617	0.00577	1617	0.00566	1617	0.00548
1618	0.00576	1618	0.0052	1618	0.00583
1619	0.00594	1619	0.005	1619	0.00616
1620	0.00609	1620	0.00539	1620	0.00624
1621	0.00621	1621	0.00539	1621	0.00608
1622	0.006	1622	0.00566	1622	0.00592
1623	0.00577	1623	0.00539	1623	0.00592
1624	0.00581	1624	0.00539	1624	0.00574
1625	0.00582	1625	0.00529	1625	0.00574
1626	0.00568	1626	0.00557	1626	0.00557
1627	0.00602	1627	0.00557	1627	0.00557
1628	0.00592	1628	0.0052	1628	0.00548
1629	0.00589	1629	0.0049	1629	0.00557
1630	0.00588	1630	0.0051	1630	0.00557
1631	0.00595	1631	0.00529	1631	0.00557
1632	0.00586	1632	0.00566	1632	0.00529
1633	0.00587	1633	0.00592	1633	0.00566
1634	0.00545	1634	0.006	1634	0.00548
1635	0.00563	1635	0.00566	1635	0.00574
1636	0.00587	1636	0.00548	1636	0.00608
1637	0.00563	1637	0.0052	1637	0.00583
1638	0.00576	1638	0.00539	1638	0.00592
1639	0.00611	1639	0.00548	1639	0.00616
1640	0.00608	1640	0.00557	1640	0.00583
1641	0.00593	1641	0.00566	1641	0.00592
1642	0.00552	1642	0.00557	1642	0.00583
1643	0.00514	1643	0.00529	1643	0.00583
1644	0.00561	1644	0.00529	1644	0.00566
1645	0.00602	1645	0.0051	1645	0.00539
1646	0.00605	1646	0.00529	1646	0.00566
1647	0.00612	1647	0.00557	1647	0.00557
1648	0.00581	1648	0.00539	1648	0.00592
1649	0.00556	1649	0.00539	1649	0.00557
1650	0.00576	1650	0.00548	1650	0.00548
1651	0.00592	1651	0.00539	1651	0.00592
1652	0.00585	1652	0.00539	1652	0.006
1653	0.00599	1653	0.00529	1653	0.00583
1654	0.00575	1654	0.0051	1654	0.00608
1655	0.0056	1655	0.00529	1655	0.00592
1656	0.00567	1656	0.0052	1656	0.00608
1657	0.00587	1657	0.0052	1657	0.00624
1658	0.00606	1658	0.00539	1658	0.00592
1659	0.00575	1659	0.00529	1659	0.00608
1660	0.00611	1660	0.00557	1660	0.006
1661	0.00613	1661	0.00539	1661	0.00583
1662	0.00586	1662	0.0052	1662	0.00574
1663	0.00579	1663	0.0051	1663	0.00548
1664	0.00564	1664	0.00529	1664	0.00592
1665	0.00591	1665	0.00548	1665	0.00592
1666	0.00607	1666	0.0052	1666	0.00574
1667	0.00591	1667	0.0049	1667	0.00592
1668	0.00575	1668	0.005	1668	0.00592
1669	0.00585	1669	0.00529	1669	0.00566
1670	0.0059	1670	0.00548	1670	0.00557
1671	0.00611	1671	0.00529	1671	0.00557
1672	0.00587	1672	0.00557	1672	0.00592
1673	0.00602	1673	0.0052	1673	0.00566
1674	0.00628	1674	0.0049	1674	0.00539
1675	0.00636	1675	0.0049	1675	0.00548
1676	0.006	1676	0.0051	1676	0.00566
1677	0.00549	1677	0.00548	1677	0.00539
1678	0.00564	1678	0.00548	1678	0.00574
1679	0.00585	1679	0.00539	1679	0.00616
1680	0.00597	1680	0.00548	1680	0.00557
1681	0.00607	1681	0.00529	1681	0.00574
1682	0.00585	1682	0.00529	1682	0.00592
1683	0.00583	1683	0.00557	1683	0.00616
1684	0.00572	1684	0.0051	1684	0.00574
1685	0.00573	1685	0.00539	1685	0.00583
1686	0.00569	1686	0.0052	1686	0.00566
1687	0.00621	1687	0.0051	1687	0.00574
1688	0.0064	1688	0.0052	1688	0.00566
1689	0.00596	1689	0.00548	1689	0.00566
1690	0.00578	1690	0.00529	1690	0.00566
1691	0.00564	1691	0.00529	1691	0.00557
1692	0.00587	1692	0.0048	1692	0.00583
1693	0.00595	1693	0.0049	1693	0.00557
1694	0.0058	1694	0.0052	1694	0.00557
1695	0.00577	1695	0.00539	1695	0.00548
1696	0.00569	1696	0.00539	1696	0.00548
1697	0.00599	1697	0.0052	1697	0.00557
1698	0.00606	1698	0.00566	1698	0.00583
1699	0.00593	1699	0.00539	1699	0.00566
1700	0.00581	1700	0.00548	1700	0.00566
1701	0.00584	1701	0.00557	1701	0.00592
1702	0.00593	1702	0.00539	1702	0.00592
1703	0.00584	1703	0.00539	1703	0.00583
1704	0.00552	1704	0.00529	1704	0.00592
1705	0.00561	1705	0.00529	1705	0.00566
1706	0.00574	1706	0.00529	1706	0.00539
1707	0.00576	1707	0.0052	1707	0.00557
1708	0.00581	1708	0.00529	1708	0.00557
1709	0.00578	1709	0.00548	1709	0.00548
1710	0.00581	1710	0.0049	1710	0.00548
1711	0.00593	1711	0.005	1711	0.00566
1712	0.0058	1712	0.0051	1712	0.00566
1713	0.00571	1713	0.0051	1713	0.00557
1714	0.00548	1714	0.0051	1714	0.00566
1715	0.00554	1715	0.00539	1715	0.00548
1716	0.00581	1716	0.00539	1716	0.00566
1717	0.00561	1717	0.00539	1717	0.00574
1718	0.00558	1718	0.00529	1718	0.00592
1719	0.00572	1719	0.0051	1719	0.00566
1720	0.00605	1720	0.0049	1720	0.00574
1721	0.0057	1721	0.005	1721	0.00583
1722	0.0056	1722	0.005	1722	0.00548
1723	0.00556	1723	0.005	1723	0.00529
1724	0.00564	1724	0.0052	1724	0.0052
1725	0.00582	1725	0.0052	1725	0.00539
1726	0.00565	1726	0.00539	1726	0.00548
1727	0.00567	1727	0.00529	1727	0.00548
1728	0.00563	1728	0.00539	1728	0.00548
1729	0.00555	1729	0.00539	1729	0.00539
1730	0.00602	1730	0.0052	1730	0.00574
1731	0.00572	1731	0.00548	1731	0.00566
1732	0.00563	1732	0.00583	1732	0.00583
1733	0.00581	1733	0.00539	1733	0.00566
1734	0.0058	1734	0.00539	1734	0.00583
1735	0.00591	1735	0.00529	1735	0.00566
1736	0.0059	1736	0.0051	1736	0.00557
1737	0.00557	1737	0.00529	1737	0.00566
1738	0.00565	1738	0.0052	1738	0.00539
1739	0.00601	1739	0.005	1739	0.00548
1740	0.00616	1740	0.0052	1740	0.00548
1741	0.00583	1741	0.00529	1741	0.00539
1742	0.00556	1742	0.00529	1742	0.00557
1743	0.0058	1743	0.0052	1743	0.00548
1744	0.00574	1744	0.00529	1744	0.00529
1745	0.00574	1745	0.00539	1745	0.0051
1746	0.00555	1746	0.00529	1746	0.00529
1747	0.00564	1747	0.00548	1747	0.00539
1748	0.00588	1748	0.00566	1748	0.00557
1749	0.00585	1749	0.00566	1749	0.00548
1750	0.00553	1750	0.00574	1750	0.00548
1751	0.0055	1751	0.00566	1751	0.00548
1752	0.00547	1752	0.00548	1752	0.00574
1753	0.00579	1753	0.00539	1753	0.00574
1754	0.00614	1754	0.00529	1754	0.00548
1755	0.00568	1755	0.0052	1755	0.00557
1756	0.00556	1756	0.0051	1756	0.00574
1757	0.00553	1757	0.00529	1757	0.00566
1758	0.00569	1758	0.00548	1758	0.00566
1759	0.00572	1759	0.00529	1759	0.00566
1760	0.0056	1760	0.00539	1760	0.00557
1761	0.00572	1761	0.0052	1761	0.00566
1762	0.00596	1762	0.00529	1762	0.00583
1763	0.00595	1763	0.00548	1763	0.00592
1764	0.00575	1764	0.0052	1764	0.00574
1765	0.00545	1765	0.0052	1765	0.00574
1766	0.00564	1766	0.0052	1766	0.00557
1767	0.00595	1767	0.00548	1767	0.00529
1768	0.00566	1768	0.00548	1768	0.00548
1769	0.00551	1769	0.00566	1769	0.00539
1770	0.0054	1770	0.00548	1770	0.00574
1771	0.00538	1771	0.00529	1771	0.00592
1772	0.00571	1772	0.0052	1772	0.00566
1773	0.00571	1773	0.00529	1773	0.00583
1774	0.0055	1774	0.0048	1774	0.00566
1775	0.00541	1775	0.0049	1775	0.00574
1776	0.00538	1776	0.005	1776	0.00574
1777	0.00579	1777	0.00529	1777	0.00574
1778	0.00599	1778	0.0052	1778	0.00574
1779	0.00566	1779	0.0051	1779	0.00566
1780	0.00547	1780	0.0052	1780	0.00566
1781	0.00551	1781	0.0052	1781	0.00566
1782	0.00556	1782	0.0052	1782	0.00574
1783	0.00582	1783	0.00548	1783	0.00574
1784	0.00568	1784	0.00548	1784	0.00583
1785	0.00544	1785	0.00566	1785	0.00548
1786	0.00523	1786	0.00566	1786	0.00529
1787	0.00554	1787	0.00548	1787	0.00539
1788	0.00555	1788	0.00566	1788	0.005
1789	0.00544	1789	0.00548	1789	0.00529
1790	0.0056	1790	0.00539	1790	0.00539
1791	0.00555	1791	0.0051	1791	0.00583
1792	0.00588	1792	0.00529	1792	0.00566
1793	0.00566	1793	0.0049	1793	0.00539
1794	0.00552	1794	0.00447	1794	0.00566
1795	0.00541	1795	0.0051	1795	0.00529
1796	0.00556	1796	0.005	1796	0.0051
1797	0.00571	1797	0.0049	1797	0.00548
1798	0.00567	1798	0.0049	1798	0.00548
1799	0.00537	1799	0.0049	1799	0.00548
1800	0.00539	1800	0.0049	1800	0.00548
1801	0.0059	1801	0.0049	1801	0.00557
1802	0.00603	1802	0.0048	1802	0.00557
1803	0.006	1803	0.005	1803	0.00574
1804	0.00573	1804	0.00529	1804	0.00566
1805	0.00554	1805	0.005	1805	0.00557
1806	0.0055	1806	0.00529	1806	0.00529
1807	0.0057	1807	0.00557	1807	0.00529
1808	0.00564	1808	0.00548	1808	0.005
1809	0.00558	1809	0.00529	1809	0.00548
1810	0.00556	1810	0.00529	1810	0.00548
1811	0.00531	1811	0.00539	1811	0.0052
1812	0.0055	1812	0.00529	1812	0.005
1813	0.00551	1813	0.0052	1813	0.0052
1814	0.00572	1814	0.00529	1814	0.00529
1815	0.00556	1815	0.0052	1815	0.0049
1816	0.00569	1816	0.005	1816	0.00539
1817	0.00602	1817	0.0051	1817	0.00529
1818	0.00582	1818	0.0052	1818	0.00539
1819	0.0056	1819	0.0052	1819	0.00548
1820	0.00551	1820	0.005	1820	0.00529
1821	0.00565	1821	0.005	1821	0.00557
1822	0.00604	1822	0.0051	1822	0.00557
1823	0.00565	1823	0.0049	1823	0.00557
1824	0.00554	1824	0.005	1824	0.00548
1825	0.00584	1825	0.0051	1825	0.00583
1826	0.00554	1826	0.0052	1826	0.00592
1827	0.0058	1827	0.0052	1827	0.00557
1828	0.00589	1828	0.00539	1828	0.00539
1829	0.00566	1829	0.00557	1829	0.00539
1830	0.00563	1830	0.0052	1830	0.0052
1831	0.00556	1831	0.0052	1831	0.00539
1832	0.00552	1832	0.0052	1832	0.00539
1833	0.00564	1833	0.0052	1833	0.00539
1834	0.00571	1834	0.0051	1834	0.00557
1835	0.00562	1835	0.00539	1835	0.00539
1836	0.00599	1836	0.005	1836	0.00548
1837	0.00596	1837	0.0049	1837	0.00548
1838	0.0059	1838	0.0051	1838	0.00539
1839	0.00587	1839	0.005	1839	0.0052
1840	0.00553	1840	0.005	1840	0.00548
1841	0.00534	1841	0.0052	1841	0.00548
1842	0.00561	1842	0.0051	1842	0.00548
1843	0.00559	1843	0.005	1843	0.00557
1844	0.00559	1844	0.0052	1844	0.00557
1845	0.00587	1845	0.0051	1845	0.00548
1846	0.00571	1846	0.0049	1846	0.00548
1847	0.00575	1847	0.0052	1847	0.00548
1848	0.00561	1848	0.0051	1848	0.00548
1849	0.00544	1849	0.0052	1849	0.00557
1850	0.00575	1850	0.0052	1850	0.00557
1851	0.00562	1851	0.00529	1851	0.00548
1852	0.00557	1852	0.0052	1852	0.00529
1853	0.00565	1853	0.0052	1853	0.00529
1854	0.00578	1854	0.0051	1854	0.00529
1855	0.00573	1855	0.005	1855	0.0052
1856	0.00545	1856	0.0051	1856	0.00529
1857	0.00556	1857	0.0049	1857	0.00529
1858	0.00546	1858	0.005	1858	0.00557
1859	0.00578	1859	0.0049	1859	0.0052
1860	0.00596	1860	0.0052	1860	0.0051
1861	0.0055	1861	0.0049	1861	0.00529
1862	0.00549	1862	0.0048	1862	0.00539
1863	0.00543	1863	0.0051	1863	0.00529
1864	0.00537	1864	0.0051	1864	0.0052
1865	0.00542	1865	0.005	1865	0.00539
1866	0.00583	1866	0.005	1866	0.00548
1867	0.00574	1867	0.0051	1867	0.00566
1868	0.00572	1868	0.0051	1868	0.00529
1869	0.00559	1869	0.0052	1869	0.00548
1870	0.00527	1870	0.0052	1870	0.00574
1871	0.00535	1871	0.0052	1871	0.00566
1872	0.0055	1872	0.00548	1872	0.00539
1873	0.00571	1873	0.00548	1873	0.00548
1874	0.00559	1874	0.00529	1874	0.0051
1875	0.00539	1875	0.0051	1875	0.00557
1876	0.00512	1876	0.0051	1876	0.00548
1877	0.00533	1877	0.0051	1877	0.00529
1878	0.00557	1878	0.0049	1878	0.00548
1879	0.00545	1879	0.0049	1879	0.00566
1880	0.00544	1880	0.005	1880	0.00548
1881	0.00544	1881	0.0049	1881	0.00548
1882	0.00529	1882	0.0051	1882	0.00529
1883	0.00542	1883	0.0049	1883	0.00539
1884	0.00575	1884	0.0048	1884	0.0051
1885	0.00571	1885	0.0051	1885	0.0051
1886	0.00562	1886	0.0051	1886	0.00529
1887	0.00558	1887	0.0049	1887	0.00539
1888	0.00562	1888	0.00529	1888	0.00529
1889	0.00555	1889	0.00529	1889	0.0051
1890	0.00553	1890	0.0052	1890	0.005
1891	0.00538	1891	0.00539	1891	0.0049
1892	0.00555	1892	0.00539	1892	0.005
1893	0.00562	1893	0.0052	1893	0.0049
1894	0.00543	1894	0.0049	1894	0.0049
1895	0.00564	1895	0.0049	1895	0.005
1896	0.00517	1896	0.005	1896	0.00548
1897	0.00515	1897	0.00539	1897	0.0052
1898	0.0052	1898	0.005	1898	0.0051
1899	0.00533	1899	0.005	1899	0.00529
1900	0.00568	1900	0.0051	1900	0.0052
1901	0.00562	1901	0.005	1901	0.0052
1902	0.00548	1902	0.0048	1902	0.0051
1903	0.0054	1903	0.0048	1903	0.0052
1904	0.00549	1904	0.0048	1904	0.00539
1905	0.00543	1905	0.0051	1905	0.00566
1906	0.00557	1906	0.0052	1906	0.00548
1907	0.0053	1907	0.005	1907	0.00566
1908	0.0053	1908	0.0049	1908	0.00548
1909	0.00535	1909	0.005	1909	0.0052
1910	0.00553	1910	0.005	1910	0.0052
1911	0.00538	1911	0.005	1911	0.0052
1912	0.00553	1912	0.0051	1912	0.00529
1913	0.00553	1913	0.0051	1913	0.0051
1914	0.00556	1914	0.005	1914	0.0049
1915	0.00555	1915	0.0049	1915	0.00529
1916	0.00547	1916	0.0051	1916	0.00529
1917	0.00554	1917	0.005	1917	0.0052
1918	0.0054	1918	0.0049	1918	0.005
1919	0.0051	1919	0.0048	1919	0.0051
1920	0.00541	1920	0.005	1920	0.0051
1921	0.00571	1921	0.0051	1921	0.0051
1922	0.00578	1922	0.0049	1922	0.00548
1923	0.0057	1923	0.005	1923	0.00557
1924	0.00553	1924	0.0051	1924	0.00548
1925	0.0054	1925	0.0052	1925	0.00529
1926	0.00528	1926	0.0051	1926	0.00539
1927	0.00537	1927	0.005	1927	0.00539
1928	0.00545	1928	0.0052	1928	0.00539
1929	0.00555	1929	0.0051	1929	0.00557
1930	0.00581	1930	0.0052	1930	0.00548
1931	0.00552	1931	0.0051	1931	0.00539
1932	0.00527	1932	0.00529	1932	0.00529
1933	0.00528	1933	0.005	1933	0.0051
1934	0.00543	1934	0.005	1934	0.0051
1935	0.00528	1935	0.005	1935	0.0052
1936	0.00522	1936	0.00529	1936	0.00548
1937	0.005	1937	0.0051	1937	0.00539
1938	0.00506	1938	0.005	1938	0.00529
1939	0.0052	1939	0.0051	1939	0.00529
1940	0.00541	1940	0.00529	1940	0.0052
1941	0.00544	1941	0.0051	1941	0.0051
1942	0.00553	1942	0.0049	1942	0.00529
1943	0.00545	1943	0.0049	1943	0.00529
1944	0.00523	1944	0.00469	1944	0.0052
1945	0.00528	1945	0.00469	1945	0.0051
1946	0.00565	1946	0.0048	1946	0.0051
1947	0.00576	1947	0.00469	1947	0.005
1948	0.00564	1948	0.005	1948	0.00529
1949	0.00595	1949	0.0048	1949	0.00539
1950	0.00565	1950	0.0051	1950	0.00529
1951	0.0056	1951	0.00539	1951	0.0051
1952	0.00541	1952	0.00557	1952	0.0049
1953	0.00503	1953	0.0051	1953	0.005
1954	0.00508	1954	0.005	1954	0.005
1955	0.00492	1955	0.005	1955	0.0051
1956	0.00509	1956	0.0051	1956	0.00529
1957	0.00508	1957	0.005	1957	0.005
1958	0.00514	1958	0.0051	1958	0.0051
1959	0.00534	1959	0.005	1959	0.0052
1960	0.00567	1960	0.0051	1960	0.005
1961	0.00536	1961	0.0049	1961	0.0049
1962	0.00559	1962	0.0049	1962	0.005
1963	0.00529	1963	0.0051	1963	0.0052
1964	0.00515	1964	0.0048	1964	0.0052
1965	0.00499	1965	0.0049	1965	0.0052
1966	0.00471	1966	0.0049	1966	0.0052
1967	0.00508	1967	0.0048	1967	0.00539
1968	0.00521	1968	0.005	1968	0.00529
1969	0.00553	1969	0.0048	1969	0.0051
1970	0.00567	1970	0.0048	1970	0.00548
1971	0.00585	1971	0.00469	1971	0.00529
1972	0.00557	1972	0.0048	1972	0.0051
1973	0.0055	1973	0.0051	1973	0.0049
1974	0.00526	1974	0.00529	1974	0.0052
1975	0.00505	1975	0.0052	1975	0.00548
1976	0.00497	1976	0.0051	1976	0.00566
1977	0.00485	1977	0.005	1977	0.00539
1978	0.00552	1978	0.0049	1978	0.00529
1979	0.00551	1979	0.0049	1979	0.0052
1980	0.00545	1980	0.0048	1980	0.0051
1981	0.00534	1981	0.0049	1981	0.005
1982	0.00517	1982	0.0051	1982	0.0048
1983	0.00531	1983	0.00529	1983	0.0048
1984	0.0053	1984	0.0052	1984	0.0052
1985	0.00538	1985	0.0052	1985	0.0048
1986	0.00544	1986	0.0052	1986	0.0048
1987	0.00516	1987	0.0052	1987	0.0049
1988	0.00522	1988	0.005	1988	0.0048
1989	0.00512	1989	0.0048	1989	0.0049
1990	0.00517	1990	0.0048	1990	0.0049
1991	0.00494	1991	0.00447	1991	0.005
1992	0.00519	1992	0.0049	1992	0.0051
1993	0.00545	1993	0.005	1993	0.00529
1994	0.00539	1994	0.005	1994	0.00539
1995	0.00531	1995	0.0049	1995	0.00539
1996	0.00542	1996	0.0048	1996	0.005
1997	0.00565	1997	0.005	1997	0.0052
1998	0.0055	1998	0.0051	1998	0.0052
1999	0.00551	1999	0.0052	1999	0.0051
2000	0.0054	2000	0.00539	2000	0.0051
[truncated: 64,611 more rows]
